# Supplementary material for: Copper‐Catalyzed Triboration of Terminal Alkynes Using B2pin2: Efficient Synthesis of 1,1,2‐Triborylalkenes
Source: PubMed Central journal article supplement — Angew Chem Int Ed Engl. 2019 Nov 19;59(1):304–9. doi: 10.1002/anie.201908466 (PMC6972586; doi:10.1002/anie.201908466), 2019-11-19
Supplement: ANIE-59-304-s001.pdf [file ANIE-59-304-s001.pdf]

Supporting Information

**Copper-Catalyzed Triboration of Terminal Alkynes Using  $B_2pin_2$ :  
Efficient Synthesis of 1,1,2-Triborylalkenes**

*Xiaocui Liu, Wenbo Ming, Alexandra Friedrich, Florian Kerner, and Todd B. Marder\**

anie\_201908466\_sm\_miscellaneous\_information.pdf

# SUPPORTING INFORMATION

## Table of Contents

|                                                              |    |
|--------------------------------------------------------------|----|
| I. General Information.....                                  | 2  |
| II. Optimization of the Reaction Conditions.....             | 3  |
| III. Substrate Scope .....                                   | 9  |
| Experimental procedures .....                                | 9  |
| Characterization data for products .....                     | 9  |
| IV. Synthetic Applications of Triborylalkenes .....          | 20 |
| Selective monoarylation of <b>2a</b> yielding <b>6</b> ..... | 20 |
| Difluorination of <b>2d</b> yielding <b>7a</b> .....         | 21 |
| Monobromination of <b>2d</b> yielding <b>8a</b> .....        | 22 |
| Dibromination of <b>2d</b> yielding <b>9a</b> .....          | 22 |
| Monobromination of <b>2</b> yielding <b>10</b> .....         | 23 |
| Dibromination of <b>2d</b> yielding <b>11a</b> .....         | 24 |
| V. Investigations Concerning the Reaction Mechanism.....     | 25 |
| Evidence for an alkynylboronate intermediate.....            | 25 |
| Deuterium labeling studies .....                             | 30 |
| VI. NMR Spectra.....                                         | 32 |
| VII. Single-crystal X-ray Diffraction .....                  | 78 |
| VIII. References.....                                        | 82 |

## I. General Information

All reagents were purchased from Alfa-Aesar, Aldrich, ABCR or VWR, and were checked for purity by GC-MS and/or  $^1\text{H}$  NMR spectroscopy and used as received.  $\text{B}_2\text{pin}_2$  was kindly provided by AllyChem Co. Ltd. (Dalian, China). HPLC grade solvents were argon saturated, dried using an Innovative Technology Inc. Pure-Solv Solvent Purification System, and further deoxygenated by using the freeze-pump-thaw method.  $\text{CDCl}_3$  was purchased from Cambridge Isotope Laboratories. All manipulations in this paper were performed in an argon-filled glove box.

Products were purified on silica gel columns using  $\text{B(OH)}_3$ -impregnated  $\text{SiO}_2$  to suppress over-adsorption on the silica gel. Commercially available, precoated TLC plates (Polygram<sup>®</sup> Sil G/UV254) were purchased from Machery-Nagel. The removal of solvent was performed on a rotary evaporator *in vacuo* at a maximum temperature of 40 °C.

GC-MS analyses were performed using an Agilent 7890A gas chromatograph (column: HP-5MS 5% phenyl methyl siloxane, 30 m,  $\phi$  0.25 mm, film 0.25  $\mu\text{m}$ ; injector: 250 °C; oven: 80 °C (2 min), 80 °C to 180 °C (20 °C  $\text{min}^{-1}$ ), 180 °C to 280 °C (50 °C  $\text{min}^{-1}$ ), 280 °C (5 min); carrier gas: He (1.2  $\text{mL min}^{-1}$ )) equipped with an Agilent 5975C inert MSD with triple-axis detector operating in EI mode and an Agilent 7693A series auto sampler/injector. Elemental analysis was performed on a Leco CHNS-932 Elemental Analyzer. High-resolution mass spectra were recorded using a Thermo Fischer Scientific Exactive Plus Orbitrap MS system (ASAP, ESI or HESI probe).

All NMR spectra were recorded at ambient temperature using Bruker DRX-300 ( $^1\text{H}$ , 300 MHz;  $^{13}\text{C}\{^1\text{H}\}$ , 75 MHz;  $^{11}\text{B}$ , 96 MHz), or Bruker Avance 500 NMR ( $^1\text{H}$ , 500 MHz;  $^{13}\text{C}\{^1\text{H}\}$ , 125 MHz;  $^{11}\text{B}$ , 160 MHz;  $^{19}\text{F}$ , 471 MHz) spectrometers.  $^1\text{H}$  NMR chemical shifts are reported relative to TMS and were referenced *via* residual proton resonance of the corresponding deuterated solvent ( $\text{CDCl}_3$ : 7.26 ppm) whereas  $^{13}\text{C}\{^1\text{H}\}$  NMR spectra are reported relative to TMS *via* the carbon signal of the deuterated solvent ( $\text{CDCl}_3$ : 77.00 ppm).  $^{11}\text{B}$  NMR chemical shifts are quoted relative to  $\text{BF}_3\cdot\text{Et}_2\text{O}$  as the external standard.  $^{19}\text{F}$  NMR chemical shifts are quoted relative to  $\text{CFCl}_3$  as the external standard.

## II. Optimization of the Reaction Conditions

**Table S1:** Screening of bases for the triboration of alkynes.<sup>a</sup>

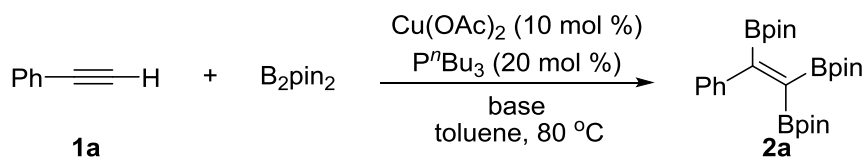

| Entry | Base (1 equiv)                                     | Product Yield <b>2a</b> <sup>b</sup> |
|-------|----------------------------------------------------|--------------------------------------|
| 1     | 4-picoline                                         | 21%                                  |
| 2     | N,N-dimethylaniline                                | 37%                                  |
| 3     | DABCO                                              | 33%                                  |
| 4     | LDA                                                | -                                    |
| 5     | -                                                  | 28% (16%)                            |
| 6     | <i>i</i> Pr <sub>2</sub> EtN                       | 45% (38%)                            |
| 7     | 2,6-lutidine                                       | 32% (15%)                            |
| 8     | Et <sub>3</sub> N                                  | 24%                                  |
| 9     | <i>n</i> Pr <sub>3</sub> N                         | 29%                                  |
| 10    | <i>i</i> Pr <sub>2</sub> EtN + N,N-dimethylaniline | 36% (31%)                            |
| 11    | NaOAc                                              | <10%                                 |
| 12    | Na <sub>2</sub> CO <sub>3</sub>                    | <10%                                 |
| 13    | Cs <sub>2</sub> CO <sub>3</sub>                    | 0                                    |
| 14    | NaOH                                               | 0                                    |
| 15    | KOH                                                | 0                                    |
| 16    | K <sub>3</sub> PO <sub>4</sub>                     | <10%                                 |

<sup>a</sup> Standard conditions: In an argon-filled glove box, **1a** (0.2 mmol, 1 equiv), Cu(OAc)<sub>2</sub> (10 mol %), P<sup>n</sup>Bu<sub>3</sub> (20 mol %), base (1 equiv), B<sub>2</sub>pin<sub>2</sub> (3 equiv), toluene (1 mL), at 80 °C for 24 h. <sup>b</sup> The product yield was determined by GC-MS using *n*-dodecane as the internal calibration standard. Isolated yields are given in parentheses. DABCO: 1,4-diazabicyclo[2.2.2]octane; LDA: lithium diisopropylamide.

**Table S2:** Screening of Cu-catalysts for the triboration of alkynes.<sup>a</sup>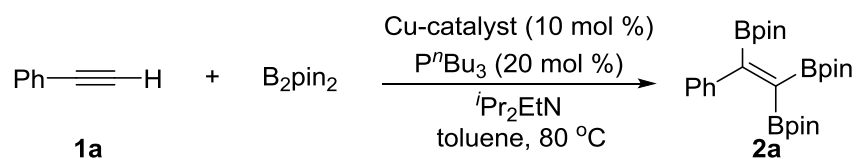

| Entry          | Catalyst (10 mol %)                                  | Product Yield <b>2a</b> <sup>b</sup> |
|----------------|------------------------------------------------------|--------------------------------------|
| 1              | CuBr <sub>2</sub>                                    | 0                                    |
| 2              | Cu(OTf) <sub>2</sub>                                 | 0                                    |
| 3              | Cu(NO <sub>3</sub> ) <sub>2</sub> ·3H <sub>2</sub> O | 0                                    |
| 4              | CuSO <sub>4</sub>                                    | 0                                    |
| 5              | Cu(acac) <sub>2</sub>                                | 0                                    |
| 6              | CuCl <sub>2</sub>                                    | 0                                    |
| 7 <sup>c</sup> | CuCl <sub>2</sub>                                    | 42%                                  |
| 8 <sup>d</sup> | CuCl <sub>2</sub>                                    | <10%                                 |
| 9              | CuOAc                                                | 29% (31%)                            |
| 10             | CuI                                                  | 0                                    |
| 11             | CuCl                                                 | 0                                    |
| 12             | Cu <sub>2</sub> O                                    | 0                                    |

<sup>a</sup> Standard conditions: In an argon-filled glove box, **1a** (0.2 mmol, 1 equiv), Cu-catalyst (10 mol %),  $P^nBu_3$  (20 mol %), DIPEA (1 equiv),  $B_2pin_2$  (3 equiv), toluene (1 mL), at 80 °C for 24 h. <sup>b</sup> The product yield was determined by GC-MS using *n*-dodecane as the internal calibration standard. Isolated yields are given in parentheses. <sup>c</sup> 20 mol % of KOAc added. <sup>d</sup> 20 mol % of KOAc and 20 mol % of 18-Crown-6 added.

**Table S3:** Screening of ligands for the triboration of alkynes.<sup>a</sup>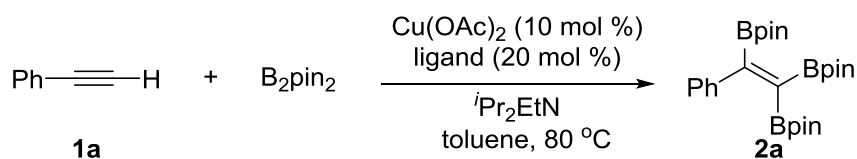

| Entry | Ligand (20 mol %)         | Product Yield <b>2a</b> <sup>b</sup> |
|-------|---------------------------|--------------------------------------|
| 1     | $PPh_3$                   | 18%                                  |
| 2     | Phen                      | < 10%                                |
| 3     | BPY                       | 0                                    |
| 4     | TFP                       | 25%                                  |
| 5     | $P(p\text{-tolyl})_3$     | 14%                                  |
| 6     | $P(o\text{-tolyl})_3$     | 0                                    |
| 7     | $P(1\text{-naphthyl})_3$  | 0                                    |
| 8     | $P^tBu_3$ (1M in toluene) | < 10%                                |
| 9     | DPPP                      | 13%                                  |
| 10    | Xantphos                  | 0                                    |
| 11    | DPPF                      | 17%                                  |
| 12    | TBP                       | 0                                    |
| 13    | Xphos                     | 0                                    |
| 14    | $PCy_3$                   | 33%                                  |

<sup>a</sup> Standard conditions: In an argon-filled glove box, **1a** (0.2 mmol, 1 equiv),  $Cu(OAc)_2$  (10 mol %), ligand (20 mol %), DIPEA (1 equiv),  $B_2pin_2$  (3 equiv), toluene (1 mL), at 80 °C for 24 h. <sup>b</sup> The product yield was determined by GC-MS using *n*-dodecane as the internal calibration standard. Phen: 1,10-phenanthroline; BPY: 2,2'-bipyridine; TFP: tri(2-furyl)phosphine; DPPP: 1,3-bis(diphenylphosphino)propane; DPPF: 1,1'-bis(diphenylphosphiniferrocene); TBP: tris(hydroxymethyl)propane bicyclic phosphite.

**Table S4:** Screening of solvents for the triboration of alkynes.<sup>a</sup>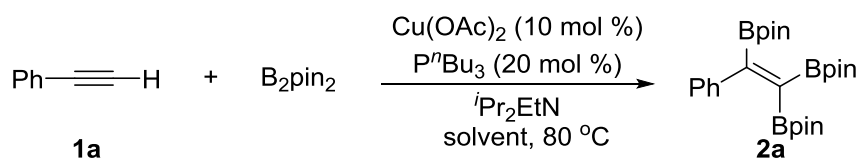

| Entry | Solvent (1 mL) | Product Yield <b>2a</b> <sup>b</sup> |
|-------|----------------|--------------------------------------|
| 1     | ethyl acetate  | 15%                                  |
| 2     | MeCN           | < 10%                                |
| 3     | MTBE           | 35%                                  |
| 4     | THF            | 10%                                  |
| 5     | hexane         | 16%                                  |
| 6     | 1,2-dioxane    | 14%                                  |
| 7     | diethyl ether  | 30%                                  |
| 8     | acetone        | 0                                    |

<sup>a</sup> Standard conditions: In an argon-filled glove box, **1a** (0.2 mmol, 1 equiv),  $Cu(OAc)_2$  (10 mol %),  $P^nBu_3$  (20 mol %), DIPEA (1 equiv),  $B_2pin_2$  (3 equiv), solvent (1 mL), at  $80\text{ }^\circ C$  for 24 h. <sup>b</sup> The product yield was determined by GC-MS using *n*-dodecane as the internal calibration standard. MTBE: methyl tert-butyl ether; THF: tetrahydrofuran

**Table S5:** Screening of temperatures for the triboration of alkynes.<sup>a</sup>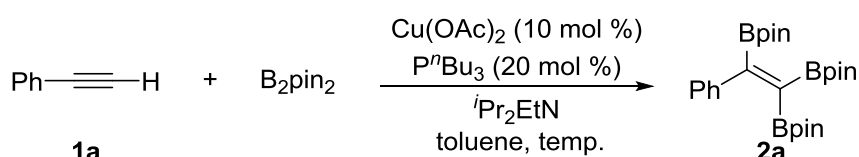

| Entry | T/ $^\circ C$ | Product Yield <b>2a</b> <sup>b</sup> |
|-------|---------------|--------------------------------------|
| 1     | 40            | < 10%                                |
| 2     | 60            | 14%                                  |
| 3     | 90            | 31%                                  |
| 4     | 100           | 31%                                  |
| 5     | 110           | 26%                                  |

<sup>a</sup> Standard conditions: In an argon-filled glove box, **1a** (0.2 mmol, 1 equiv),  $Cu(OAc)_2$  (10 mol %),  $P^nBu_3$  (20 mol %), DIPEA (1 equiv),  $B_2pin_2$  (3 equiv), toluene (1 mL), 24 h. <sup>b</sup> The product yield was determined by GC-MS using *n*-dodecane as the internal calibration standard.

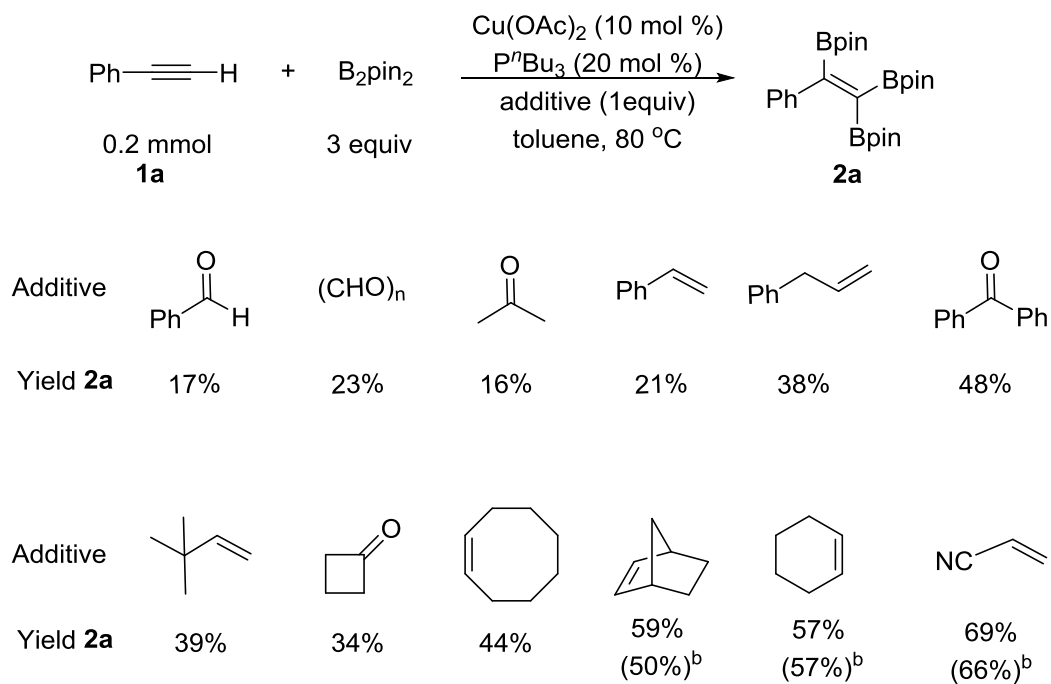

<sup>a</sup> Standard conditions: In an argon-filled glove box, **1a** (0.2 mmol, 1 equiv),  $\text{Cu(OAc)}_2$  (10 mol %),  $\text{P}^n\text{Bu}_3$  (20 mol %),  $\text{B}_2\text{pin}_2$  (3 equiv), additives (1 equiv), toluene (1 mL), at 80 °C for 24 h. <sup>b</sup>The product yield was determined by GC-MS using *n*-dodecane as the internal calibration standard. Isolated yields are given in parentheses.

**Scheme S1:** Screening of additives for the triboration of alkynes.



**Table S6:** Screening of other conditions for the triboration of alkynes.<sup>a</sup>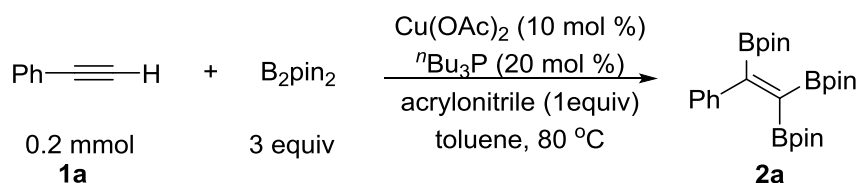

| Entry           | Catalyst    | Ligand    | Time/ h | T/ °C | Product Yield <b>2a</b> <sup>b</sup> |
|-----------------|-------------|-----------|---------|-------|--------------------------------------|
| 1 <sup>c</sup>  | $Cu(OAc)_2$ | $P^nBu_3$ | 24      | 80    | 42% (37%)                            |
| 2               | $Cu(OAc)_2$ | $P^nBu_3$ | 14      | 80    | 49%                                  |
| 3               | $Cu(OAc)_2$ | $P^nBu_3$ | 14      | r.t   | 0                                    |
| 4               | $Cu(OAc)_2$ | $P^nBu_3$ | 14      | 60    | 22%                                  |
| 5               | $Cu(OAc)_2$ | $P^nBu_3$ | 12      | 80    | 47% (44%)                            |
| 6               | $Cu(OAc)_2$ | $P^nBu_3$ | 12      | 90    | 38%                                  |
| 7               | $Cu(OAc)_2$ | $P^nBu_3$ | 12      | 100   | 42%                                  |
| 8               | $Cu(OAc)_2$ | --        | 12      | 80    | 0                                    |
| 9               | --          | $P^nBu_3$ | 12      | 80    | 0                                    |
| 10              | $Cu(OAc)_2$ | $P^nBu_3$ | 10      | 80    | (60%)                                |
| 11              | $Cu(OAc)_2$ | $P^nBu_3$ | 8       | 80    | (51%)                                |
| 12              | $Cu(OAc)_2$ | $P^nBu_3$ | 6       | 80    | (52%)                                |
| 13              | $Cu(OAc)_2$ | $P^nBu_3$ | 5       | 80    | (52%)                                |
| 14              | $Cu(OAc)_2$ | $P^nBu_3$ | 4       | 80    | 78% (73%)                            |
| 15              | $Cu(OAc)_2$ | $P^nBu_3$ | 3       | 80    | (39%)                                |
| 16              | $Cu(OAc)_2$ | $P^nBu_3$ | 2       | 80    | (60%)                                |
| 17 <sup>d</sup> | $Cu(OAc)_2$ | $P^nBu_3$ | 4       | 80    | (31%)                                |
| 18 <sup>e</sup> | $Cu(OAc)_2$ | $P^nBu_3$ | 4       | 80    | 67% (59%)                            |

<sup>a</sup> Standard conditions: In an Ar-filled glove box, **1a** (0.2 mmol, 1 equiv),  $Cu(OAc)_2$  (10 mol %),  $P^nBu_3$  (20 mol %),  $B_2pin_2$  (3 equiv), acrylonitrile (1 equiv), toluene (1 mL). <sup>b</sup> The product yield was determined by GC-MS using *n*-dodecane as the internal calibration standard. Isolated yields are given in parentheses. <sup>c</sup>  $iPr_2EtN$  (1 equiv). <sup>d</sup> Without acrylonitrile. <sup>e</sup>  $P^nBu_3$  (10 mol %)

### III. Substrate Scope

#### Experimental procedures

**General procedure:** In a glove box, to a 10 mL thick-walled reaction tube equipped with a magnetic stirring bar, Cu(OAc)<sub>2</sub> (10 mol %, 3.6 mg, 0.02 mmol), B<sub>2</sub>pin<sub>2</sub> (3 equiv, 152.4 mg, 0.6 mmol) and toluene (1 mL) were added. Then, phenylacetylene **1a** (20.4 mg, 22 μL, 0.2 mmol), acrylonitrile (10.6 mg, 13 μL, 0.2 mmol) and P<sup>n</sup>Bu<sub>3</sub> (8.1 mg, 9.9 μL, 0.04 mmol) were added in that order and the tube was sealed with a crimped septum cap. The reaction was heated at 80 °C under argon for the indicated amount of time. The reaction mixture was then diluted with Et<sub>2</sub>O (4 mL) and filtered through a plug of celite (∅ 3 mm × 8 mm) in air with copious washing (Et<sub>2</sub>O). The solvents were removed *in vacuo*, and the residue was purified by column chromatography on silica gel (pentane: ethyl acetate = 25:1).

#### Characterization data for products

##### 2,2',2''-(2-phenylethene-1,1,2-triyl)tris(4,4,5,5-tetramethyl-1,3,2-dioxaborolane) (2a)

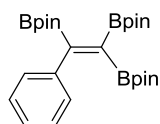

**Isolated yield:** 73%

White solid, m.p: 244.8 °C. Its spectroscopic data are consistent with a literature report.<sup>[1]</sup>

**<sup>1</sup>H NMR** (500 MHz, CDCl<sub>3</sub>) δ 7.29 – 7.26 (m, 2H), 7.24 – 7.20 (m, 2H), 7.19 – 7.15 (m, 1H), 1.30 (s, 12H), 1.27 (s, 12H), 1.08 (s, 12H).

**<sup>13</sup>C{<sup>1</sup>H} NMR** (126 MHz, CDCl<sub>3</sub>) δ 145.2, 127.7, 127.6, 126.6, 83.8, 83.4, 83.1, 24.9, 24.8, 24.5. The carbon atoms directly attached to boron were not detected, likely due to quadrupolar broadening.

**<sup>11</sup>B NMR** (160 MHz, CDCl<sub>3</sub>) δ 30.9.

**HRMS** (ASAP): m/z for C<sub>26</sub>H<sub>42</sub>B<sub>3</sub>O<sub>6</sub> [M+H<sup>+</sup>] calcd: 483.3255, found: 483.3245

**2,2',2''-(2-(p-tolyl)ethene-1,1,2-triyl)tris(4,4,5,5-tetramethyl-1,3,2-dioxaborolane)  
(2b)**

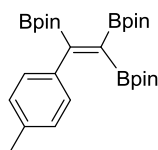

**Isolated yield:** 72%

White solid, m.p: 230.9 °C. Its spectroscopic data are consistent with a literature report.<sup>[1]</sup>

**<sup>1</sup>H NMR** (500 MHz, CDCl<sub>3</sub>) δ 7.18 (d, *J* = 8 Hz, 2H), 7.03 (d, *J* = 8 Hz, 2H), 2.29 (s, 3H), 1.30 (s, 12H), 1.27 (s, 12H), 1.10 (s, 12H).

**<sup>13</sup>C{<sup>1</sup>H} NMR** (126 MHz, CDCl<sub>3</sub>) δ 142.3, 136.3, 128.3, 127.6, 83.8, 83.4, 83.1, 24.9, 24.8, 24.5, 21.2. The carbon atoms directly attached to boron were not detected, likely due to quadrupolar broadening.

**<sup>11</sup>B NMR** (160 MHz, CDCl<sub>3</sub>) δ 30.8.

**HRMS** (ASAP): *m/z* for C<sub>27</sub>H<sub>44</sub>B<sub>3</sub>O<sub>6</sub> [M+H<sup>+</sup>] calcd: 497.3412, found: 497.3402

**2,2',2''-(2-(m-tolyl)ethene-1,1,2-triyl)tris(4,4,5,5-tetramethyl-1,3,2-dioxaborolane)  
(2c)**

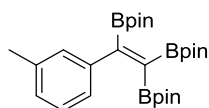

**Isolated yield:** 58%

White solid, m.p: 230.6 °C.

**<sup>1</sup>H NMR** (500 MHz, CDCl<sub>3</sub>) δ 7.1 – 7.1 (m, 1H), 7.1 – 7.1 (m, 2H), 7.0 – 7.0 (m, 1H), 2.28 (s, 3H), 1.30 (s, 12H), 1.27 (s, 12H), 1.09 (s, 12H).

**<sup>13</sup>C{<sup>1</sup>H} NMR** (126 MHz, CDCl<sub>3</sub>) δ 145.1, 136.8, 128.5, 127.5, 127.5, 124.7, 83.8, 83.4, 83.1, 24.9, 24.8, 24.5, 21.4. The carbon atoms directly attached to boron were not detected, likely due to quadrupolar broadening.

**<sup>11</sup>B NMR** (160 MHz, CDCl<sub>3</sub>) δ 30.6.

**HRMS** (ASAP): *m/z* for C<sub>27</sub>H<sub>44</sub>B<sub>3</sub>O<sub>6</sub> [M+H<sup>+</sup>] calcd: 497.3412, found: 497.3414.

**Anal. Calcd** for C<sub>27</sub>H<sub>43</sub>B<sub>3</sub>O<sub>7</sub>: C, 65.37; H, 8.74; Found: C, 65.28; H, 8.54.

**2,2',2''-(2-(4-methoxyphenyl)ethene-1,1,2-triyl)tris(4,4,5,5-tetramethyl-1,3,2-dioxaborolane) (2d)**

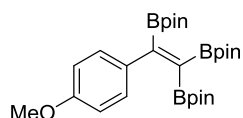

**Isolated yield:** 70%

White solid, m.p: 137.1 °C. Its spectroscopic data are consistent with a literature report.<sup>[1]</sup>

**<sup>1</sup>H NMR** (500 MHz, CDCl<sub>3</sub>) δ 7.23 (d, *J* = 9 Hz, 2H), 6.78 (d, *J* = 9 Hz, 2H), 3.77 (s, 3H), 1.30 (s, 12H), 1.27 (s, 12H), 1.11 (s, 12H).

**<sup>13</sup>C{<sup>1</sup>H} NMR** (126 MHz, CDCl<sub>3</sub>) δ 158.7, 137.9, 129.0, 113.1, 83.8, 83.3, 83.1, 55.2, 24.9, 24.8, 24.6. The carbon atoms directly attached to boron were not detected, likely due to quadrupolar broadening.

**<sup>11</sup>B NMR** (160 MHz, CDCl<sub>3</sub>) δ 30.4.

**HRMS** (ASAP): *m/z* for C<sub>27</sub>H<sub>44</sub>B<sub>3</sub>O<sub>7</sub> [M+H<sup>+</sup>] calcd: 513.3361, found: 513.3353.

**2,2',2''-(2-(3-methoxyphenyl)ethene-1,1,2-triyl)tris(4,4,5,5-tetramethyl-1,3,2-dioxaborolane) (2e)**

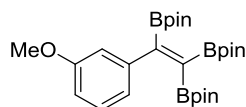

**Isolated yield:** 58%

White solid, m.p: 217.5 °C.

**<sup>1</sup>H NMR** (500 MHz, CDCl<sub>3</sub>) δ 7.2 – 7.1 (m, 1H), 6.9 (ddd, *J* = 8, 2, 1 Hz, 1H), 6.8 (dd, *J* = 3, 2 Hz, 1H), 6.7 (ddd, *J* = 8, 3, 1 Hz, 1H), 3.77 (s, 3H), 1.30 (s, 12H), 1.27 (s, 12H), 1.08 (s, 12H).

**<sup>13</sup>C{<sup>1</sup>H} NMR** (126 MHz, CDCl<sub>3</sub>) δ 158.9, 146.7, 128.6, 120.1, 113.0, 112.7, 83.8, 83.4, 83.2, 55.0, 24.9, 24.8, 24.5. The carbon atoms directly attached to boron were not detected, likely due to quadrupolar broadening.

**<sup>11</sup>B NMR** (160 MHz, CDCl<sub>3</sub>) δ 30.7.

**HRMS** (ASAP): *m/z* for C<sub>27</sub>H<sub>44</sub>B<sub>3</sub>O<sub>7</sub> [M+H<sup>+</sup>] calcd: 513.3361, found: 513.3362.

**Anal. Calcd** for C<sub>27</sub>H<sub>43</sub>B<sub>3</sub>O<sub>7</sub>: C, 63.33; H, 8.46; Found: C, 63.45; H, 8.71.

**2,2',2''-(2-(2-methoxyphenyl)ethene-1,1,2-triyl)tris(4,4,5,5-tetramethyl-1,3,2-dioxaborolane) (2f)**

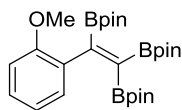

**Isolated yield:** 49%

White solid, m.p: 166.2 °C.

**<sup>1</sup>H NMR** (500 MHz, CDCl<sub>3</sub>) δ 7.17 – 7.09 (m, 2H), 6.80 (apparent td, *J* = 7, 1 Hz, 1H), 6.75 (dd, *J* = 8, 1 Hz, 1H), 3.73 (s, 3H), 1.31 (s, 12H), 1.25 (s, 12H), 1.06 (s, 12H).

**<sup>13</sup>C{<sup>1</sup>H} NMR** (126 MHz, CDCl<sub>3</sub>) δ 156.4, 135.2, 129.8, 128.1, 120.3, 109.8, 83.5, 83.3, 83.0, 55.1, 24.9, 24.7, 24.5. The carbon atoms directly attached to boron were not detected, likely due to quadrupolar broadening.

**<sup>11</sup>B NMR** (160 MHz, CDCl<sub>3</sub>) δ 31.0.

**HRMS** (ASAP): *m/z* for C<sub>27</sub>H<sub>44</sub>B<sub>3</sub>O<sub>7</sub> [M+H<sup>+</sup>] calcd: 513.3361, found: 513.3357.

**Anal. Calcd** for C<sub>27</sub>H<sub>43</sub>B<sub>3</sub>O<sub>7</sub>: C, 63.33; H, 8.46; Found: C, 63.05; H, 8.56.

**N,N-dimethyl-4-(1,2,2-tris(4,4,5,5-tetramethyl-1,3,2-dioxaborolan-2-yl)vinyl)aniline (2g)**

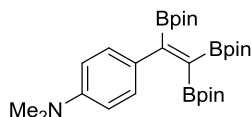

**Isolated yield:** 35%

White solid, m.p: 220.3 °C.

**<sup>1</sup>H NMR** (500 MHz, CDCl<sub>3</sub>) δ 7.22 (d, *J* = 9 Hz, 2H), 6.62 (d, *J* = 9 Hz, 2H), 2.91 (s, 6H), 1.29 (s, 12H), 1.28 (s, 12H), 1.14 (s, 12H).

**<sup>13</sup>C{<sup>1</sup>H} NMR** (126 MHz, CDCl<sub>3</sub>) δ 149.8, 134.0, 128.7, 112.0, 83.6, 83.1, 82.9, 40.7, 24.9 (2C), 24.6. The carbon atoms directly attached to boron were not detected, likely due to quadrupolar broadening.

**<sup>11</sup>B NMR** (160 MHz, CDCl<sub>3</sub>) δ 30.4.

**HRMS** (ASAP): *m/z* for C<sub>28</sub>H<sub>47</sub>B<sub>3</sub>NO<sub>6</sub> [M+H<sup>+</sup>] calcd: 526.3677, found: 526.3672.

**Anal. Calcd** for C<sub>28</sub>H<sub>46</sub>B<sub>3</sub>NO<sub>6</sub>: C, 64.05; H, 8.83; N, 2.67; Found: C, 63.91; H, 9.03; N, 2.63.

**2,2',2''-(2-(4-fluorophenyl)ethene-1,1,2-triyl)tris(4,4,5,5-tetramethyl-1,3,2-dioxaborolane) (2j)**

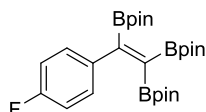

**Isolated yield:** 72%

White solid, m.p: 235.6 °C.

**<sup>1</sup>H NMR** (500 MHz, CDCl<sub>3</sub>) δ 7.26-7.21 (m, 2H), 6.95-6.88 (m, 2H), 1.30 (s, 12H), 1.26 (s, 12H), 1.09 (s, 12H).

**<sup>13</sup>C{<sup>1</sup>H} NMR** (126 MHz, CDCl<sub>3</sub>) δ 162.0 (d, *J* = 245 Hz), 141.2 (d, *J* = 4 Hz), 129.4 (d, *J* = 8 Hz), 114.3 (d, *J* = 21 Hz), 84.0, 83.5, 83.2, 24.9, 24.8, 24.5. The carbon atoms directly attached to boron were not detected, likely due to quadrupolar broadening.

**<sup>11</sup>B NMR** (160 MHz, CDCl<sub>3</sub>) δ 30.7.

**<sup>19</sup>F NMR** (471 MHz, CDCl<sub>3</sub>) δ -116.7 (tt, *J* = 9, 6 Hz).

**HRMS** (ASAP): *m/z* for C<sub>26</sub>H<sub>41</sub>B<sub>3</sub>F<sub>1</sub>O<sub>6</sub> [M+H<sup>+</sup>] calcd: 501.3161, found: 501.3156.

**Anal. Calcd** for C<sub>26</sub>H<sub>40</sub>B<sub>3</sub>F<sub>1</sub>O<sub>6</sub>: C, 62.45; H, 8.06; Found: C, 62.96; H, 8.19.

**2,2',2''-(2-(3-fluorophenyl)ethene-1,1,2-triyl)tris(4,4,5,5-tetramethyl-1,3,2-dioxaborolane) (2k)**

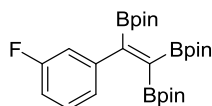

**Isolated yield:** 59%

White solid, m.p: 196.0 °C.

**<sup>1</sup>H NMR** (500 MHz, CDCl<sub>3</sub>) δ 7.19 (td, *J* = 8, 6 Hz, 1H), 7.04 (ddd, *J* = 8, 2, 1 Hz, 1H), 6.99 (ddd, *J* = 10, 3, 2 Hz, 1H), 6.87 (dddd, *J* = 9, 8, 3, 1 Hz, 1H), 1.31 (s, 12H), 1.27 (s, 12H), 1.10 (s, 12H).

**<sup>13</sup>C{<sup>1</sup>H} NMR** (126 MHz, CDCl<sub>3</sub>) δ 162.3 (d, *J* = 245 Hz), 147.4 (d, *J* = 7 Hz), 129.0 (d, *J* = 8 Hz), 123.5 (d, *J* = 3 Hz), 114.7 (d, *J* = 21 Hz), 113.4 (d, *J* = 21 Hz), 84.0, 83.5, 83.3, 24.9, 24.8, 24.5. The carbon atoms directly attached to boron were not detected, likely due to quadrupolar broadening.

**<sup>11</sup>B NMR** (160 MHz, CDCl<sub>3</sub>) δ 30.7.

**<sup>19</sup>F NMR** (471 MHz, CDCl<sub>3</sub>) δ -114.6 (dddd, *J* = 10, 9, 6, 1 Hz).

**HRMS** (ASAP): *m/z* for C<sub>26</sub>H<sub>41</sub>B<sub>3</sub>FO<sub>6</sub> [M+H<sup>+</sup>] calcd: 501.3161, found: 501.3162.

**Anal. Calcd** for C<sub>26</sub>H<sub>40</sub>B<sub>3</sub>FO<sub>6</sub>: C, 62.45; H, 8.06; Found: C, 62.80; H, 8.37.

**2,2',2''-(2-(3-chlorophenyl)ethene-1,1,2-triyl)tris(4,4,5,5-tetramethyl-1,3,2-dioxaborolane) (2l)**

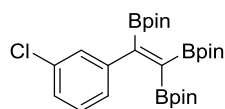

**Isolated yield:** 56%

White solid, m.p: 186.2 °C.

**<sup>1</sup>H NMR** (500 MHz, CDCl<sub>3</sub>) δ 7.27 – 7.26 (m, 1H), 7.17 – 7.14 (m, 3H), 1.31 (s, 12H), 1.27 (s, 12H), 1.10 (s, 12H).

**<sup>13</sup>C{<sup>1</sup>H} NMR** (126 MHz, CDCl<sub>3</sub>) δ 146.9, 133.4, 128.8, 127.9, 126.6, 125.9, 84.0, 83.6, 83.4, 24.9, 24.8, 24.5. The carbon atoms directly attached to boron were not detected, likely due to quadrupolar broadening.

**<sup>11</sup>B NMR** (160 MHz, CDCl<sub>3</sub>) δ 30.6.

**HRMS** (ASAP): m/z for C<sub>26</sub>H<sub>41</sub>B<sub>3</sub>Cl<sub>1</sub>O<sub>6</sub> [M+H<sup>+</sup>] calcd: 517.2865, found: 517.2870.

**Anal. Calcd** for C<sub>26</sub>H<sub>40</sub>B<sub>3</sub>ClO<sub>6</sub>: C, 60.46; H, 7.81; Found: C, 60.48; H, 7.95.

**2,2',2''-(2-(4-(trifluoromethyl)phenyl)ethene-1,1,2-triyl)tris(4,4,5,5-tetramethyl-1,3,2-dioxaborolane) (2m)**

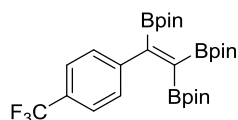

**Isolated yield:** 47%

White solid, m.p: 201.0 °C. Its spectroscopic data are consistent with a literature report.<sup>[1]</sup>

**<sup>1</sup>H NMR** (500 MHz, CDCl<sub>3</sub>) δ 7.49 (d, *J* = 8 Hz, 2H), 7.35 (d, *J* = 8 Hz, 2H), 1.32 (s, 12H), 1.27 (s, 12H), 1.06 (s, 12H).

**<sup>13</sup>C{<sup>1</sup>H} NMR** (126 MHz, CDCl<sub>3</sub>) δ 148.9, 128.5 (q, *J* = 32 Hz), 128.0, 124.5 (q, *J* = 272 Hz), 124.5 (q, *J* = 4 Hz), 84.1, 83.7, 83.4, 24.9, 24.7, 24.4. The carbon atoms directly attached to boron were not detected, likely due to quadrupolar broadening.

**<sup>11</sup>B NMR** (160 MHz, CDCl<sub>3</sub>) δ 30.8.

**<sup>19</sup>F NMR** (471 MHz, CDCl<sub>3</sub>) δ -62.3.

**HRMS** (ASAP): m/z for C<sub>27</sub>H<sub>41</sub>B<sub>3</sub>F<sub>3</sub>O<sub>6</sub> [M+H<sup>+</sup>] calcd: 551.3129, found: 551.3124.

**Anal. Calcd** for C<sub>27</sub>H<sub>40</sub>B<sub>3</sub>F<sub>3</sub>O<sub>6</sub>: C, 58.96; H, 7.33; Found: C, 59.31; H, 7.64.

**2,2',2''-(2-(6-methoxynaphthalen-2-yl)ethene-1,1,2-triyl)tris(4,4,5,5-tetramethyl-1,3,2-dioxaborolane) (2n)**

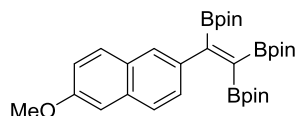

**Isolated yield:** 49%

White solid, m.p: 190.3 °C.

**<sup>1</sup>H NMR** (500 MHz, CDCl<sub>3</sub>) δ 7.69 – 7.59 (m, 3H), 7.43 (dd, *J* = 8, 2 Hz, 1H), 7.11 – 7.04 (m, 2H), 3.90 (s, 3H), 1.32 (s, 12H), 1.29 (s, 12H), 1.02 (s, 12H).

**<sup>13</sup>C{<sup>1</sup>H} NMR** (126 MHz, CDCl<sub>3</sub>) δ 157.2, 141.0, 133.6, 129.6, 128.7, 127.0, 126.2, 125.9, 118.3, 105.6, 83.9, 83.4, 83.1, 55.2, 24.9, 24.8, 24.5. The carbon atoms directly attached to boron were not detected, likely due to quadrupolar broadening.

**<sup>11</sup>B NMR** (160 MHz, CDCl<sub>3</sub>) δ 30.7.

**HRMS** (ASAP): *m/z* for C<sub>31</sub>H<sub>46</sub>B<sub>3</sub>O<sub>7</sub> [M+H<sup>+</sup>] calcd: 563.3517, found: 563.3514.

**Anal. Calcd** for C<sub>31</sub>H<sub>45</sub>B<sub>3</sub>O<sub>7</sub>: C, 66.24; H, 8.07; Found: C, 66.46; H, 8.11.

**2,2',2''-(2-(thiophen-3-yl)ethene-1,1,2-triyl)tris(4,4,5,5-tetramethyl-1,3,2-dioxaborolane) (2o)**

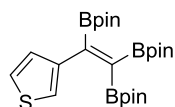

**Isolated yield:** 61%

White solid, m.p: 170.4 °C.

**<sup>1</sup>H NMR** (500 MHz, CDCl<sub>3</sub>) δ 7.22 (dd, *J* = 3, 1 Hz, 1H), 7.15 (dd, *J* = 5, 3 Hz, 1H), 7.10 (dd, *J* = 5, 1 Hz, 1H), 1.29 (s, 12H), 1.27 (s, 12H), 1.15 (s, 12H).

**<sup>13</sup>C{<sup>1</sup>H} NMR** (126 MHz, CDCl<sub>3</sub>) δ 146.2, 128.2, 124.2, 122.1, 83.8, 83.4, 83.3, 24.9, 24.8, 24.6. The carbon atoms directly attached to boron were not detected, likely due to quadrupolar broadening.

**<sup>11</sup>B NMR** (160 MHz, CDCl<sub>3</sub>) δ 30.7.

**HRMS** (ASAP): *m/z* for C<sub>24</sub>H<sub>40</sub>B<sub>3</sub>O<sub>6</sub>S<sub>1</sub> [M+H<sup>+</sup>] calcd: 489.2819, found: 489.2811.

**Anal. Calcd** for C<sub>24</sub>H<sub>39</sub>B<sub>3</sub>O<sub>6</sub>S: C, 59.06; H, 8.05; S, 6.57; Found: C, 59.27; H, 8.36; S, 6.01.



**2,2',2''-(3-phenylprop-1-ene-1,1,2-triyl)tris(4,4,5,5-tetramethyl-1,3,2-dioxaborolane) (2p)**

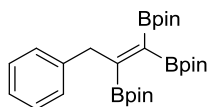

**Isolated yield:** 69%

White solid, m.p: 167.2 °C. Its spectroscopic data are consistent with a literature report.<sup>[1]</sup>

**<sup>1</sup>H NMR** (500 MHz, CDCl<sub>3</sub>) δ 7.32 – 7.29 (m, 2H), 7.21 – 7.16 (m, 2H), 7.12 – 7.07 (m, 1H), 3.76 (s, 2H), 1.29 (s, 12H), 1.25 (s, 12H), 1.07 (s, 12H).

**<sup>13</sup>C{<sup>1</sup>H} NMR** (126 MHz, CDCl<sub>3</sub>) δ 140.8, 129.7, 127.8, 125.4, 83.5, 83.3, 83.1, 43.6, 24.9, 24.8, 24.6. The carbon atoms directly attached to boron were not detected, likely due to quadrupolar broadening.

**<sup>11</sup>B NMR** (160 MHz, CDCl<sub>3</sub>) δ 30.7.

**HRMS** (ASAP): m/z for C<sub>27</sub>H<sub>44</sub>B<sub>3</sub>O<sub>7</sub> [M+H<sup>+</sup>] calcd: 497.3412, found: 497.3412.

**2,2',2''-(4-phenylbut-1-ene-1,1,2-triyl)tris(4,4,5,5-tetramethyl-1,3,2-dioxaborolane) (2q)**

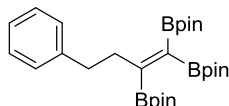

**Isolated yield:** 74%

White solid, m.p: 226.8 °C. Its spectroscopic data are consistent with a literature report.<sup>[1]</sup>

**<sup>1</sup>H NMR** (500 MHz, CDCl<sub>3</sub>) δ 7.26 (d, *J* = 1 Hz, 2H), 7.25 (s, 2H), 7.17 – 7.12 (m, 1H), 2.66 (s, 4H), 1.31 (s, 12H), 1.27 (s, 12H), 1.25 (s, 12H).

**<sup>13</sup>C{<sup>1</sup>H} NMR** (126 MHz, CDCl<sub>3</sub>) δ 143.5, 128.5, 128.1, 125.3, 83.7, 83.3, 83.0, 40.2, 37.2, 24.9, 24.9, 24.8. The carbon atoms directly attached to boron were not detected, likely due to quadrupolar broadening.

**<sup>11</sup>B NMR** (160 MHz, CDCl<sub>3</sub>) δ 30.6.

**HRMS** (ASAP): m/z for C<sub>28</sub>H<sub>46</sub>B<sub>3</sub>O<sub>6</sub> [M+H<sup>+</sup>] calcd: 511.3568, found: 511.3571.

## 2,2',2''-(hex-1-ene-1,1,2-triyl)tris(4,4,5,5-tetramethyl-1,3,2-dioxaborolane) (2r)

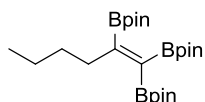

**Isolated yield:** 58%

White solid, m.p: 216.2 °C. Its spectroscopic data are consistent with a literature report.<sup>[1]</sup>

**<sup>1</sup>H NMR** (500 MHz, CDCl<sub>3</sub>) δ 2.36 (t, *J* = 7 Hz, 2H), 1.38 – 1.29 (m, 4H), 1.28 (s, 12H), 1.24 (s, 12H), 1.23 (s, 12H), 0.86 (t, *J* = 7 Hz, 3H).

**<sup>13</sup>C{<sup>1</sup>H} NMR** (126 MHz, CDCl<sub>3</sub>) δ 83.5, 83.1, 82.8, 37.5, 32.7, 24.9, 24.8, 24.7, 22.8, 14.1. The carbon atoms directly attached to boron were not detected, likely due to quadrupolar broadening.

**<sup>11</sup>B NMR** (160 MHz, CDCl<sub>3</sub>) δ 30.8.

**HRMS** (ASAP): *m/z* for C<sub>24</sub>H<sub>46</sub>B<sub>3</sub>O<sub>6</sub> [M+H<sup>+</sup>] calcd: 463.3568, found: 463.3569.

## 2,2',2''-(2-cyclohexylethene-1,1,2-triyl)tris(4,4,5,5-tetramethyl-1,3,2-dioxaborolane) (2s)

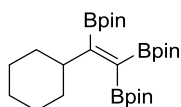

**Isolated yield:** 71%

White solid, m.p: 278.6 °C.

**<sup>1</sup>H NMR** (500 MHz, CDCl<sub>3</sub>) δ 2.32 (tt, *J* = 12, 4 Hz, 1H), 1.76 – 1.58 (m, 6H), 1.48 – 1.34 (m, 2H), 1.27 (s, 12H), 1.25 (s, 12H), 1.23 (s, 12H), 1.22 – 1.06 (m, 2H).

**<sup>13</sup>C{<sup>1</sup>H} NMR** (126 MHz, CDCl<sub>3</sub>) δ 83.3, 83.0, 82.9, 49.9, 32.2, 26.6, 26.1, 25.1, 24.9, 24.7. The carbon atoms directly attached to boron were not detected, likely due to quadrupolar broadening.

**<sup>11</sup>B NMR** (160 MHz, CDCl<sub>3</sub>) δ 30.7.

**HRMS** (ASAP): *m/z* for C<sub>26</sub>H<sub>48</sub>B<sub>3</sub>O<sub>6</sub> [M+H<sup>+</sup>] calcd: 489.3725, found: 489.3726.

**Anal. Calcd** for C<sub>26</sub>H<sub>47</sub>B<sub>3</sub>O<sub>6</sub>: C, 63.98; H, 9.71; Found: C, 64.38; H, 9.90.

**2,2',2''-(2-cyclopentylethene-1,1,2-triyl)tris(4,4,5,5-tetramethyl-1,3,2-dioxaborolane) (2t)**

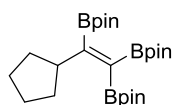

**Isolated yield:** 64%

White solid, m.p: 278.6 °C. Its spectroscopic data are consistent with a literature report.<sup>[1]</sup>

**<sup>1</sup>H NMR** (500 MHz, CDCl<sub>3</sub>) δ 2.87 – 2.75 (apparent quintet, *J* = 9 Hz, 1H), 1.77 – 1.44 (m, 8H), 1.26 (s, 12H), 1.24 (s, 12H), 1.23 (s, 12H).

**<sup>13</sup>C{<sup>1</sup>H} NMR** (126 MHz, CDCl<sub>3</sub>) δ 83.3, 83.0, 82.9, 50.6, 32.6, 26.1, 25.1, 24.9, 24.7.

The carbon atoms directly attached to boron were not detected, likely due to quadrupolar broadening.

**<sup>11</sup>B NMR** (160 MHz, CDCl<sub>3</sub>) δ 30.6.

**HRMS** (ASAP): m/z for C<sub>26</sub>H<sub>46</sub>B<sub>3</sub>O<sub>6</sub> [M+H<sup>+</sup>] calcd: 487.3568, found: 487.3565.

**2,2',2''-(2-cyclopropylethene-1,1,2-triyl)tris(4,4,5,5-tetramethyl-1,3,2-dioxaborolane) (2u)**

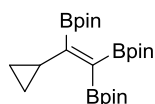

**Isolated yield:** 54%

White solid, m.p: 233.4 °C.

**<sup>1</sup>H NMR** (500 MHz, CDCl<sub>3</sub>) δ 1.94 (tt, *J* = 8, 5 Hz, 1H), 1.24 (s, 12H), 1.24 (s, 24H), 0.77 (m, 2H), 0.71 – 0.63 (m, 2H).

**<sup>13</sup>C{<sup>1</sup>H} NMR** (126 MHz, CDCl<sub>3</sub>) δ 83.4, 82.9, 82.8, 25.0, 24.9, 24.7, 20.2, 7.5. The carbon atoms directly attached to boron were not detected, likely due to quadrupolar broadening.

**<sup>11</sup>B NMR** (160 MHz, CDCl<sub>3</sub>) δ 30.6.

**HRMS** (ASAP): m/z for C<sub>23</sub>H<sub>42</sub>B<sub>3</sub>O<sub>6</sub> [M+H<sup>+</sup>] calcd: 447.3255, found: 447.3258.

**Anal. Calcd** for C<sub>23</sub>H<sub>41</sub>B<sub>3</sub>O<sub>6</sub>: C, 61.94; H, 9.27; Found: C, 62.12; H, 9.42.

**2,2',2''-(2-(cyclohex-1-en-1-yl)ethene-1,1,2-triyl)tris(4,4,5,5-tetramethyl-1,3,2-dioxaborolane) (2v)**

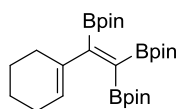

**Isolated yield:** 52%

White solid, m.p: 235 °C. Its spectroscopic data are consistent with a literature report.<sup>[1]</sup>

**<sup>1</sup>H NMR** (500 MHz, CDCl<sub>3</sub>) δ 5.48 (tt, *J* = 4, 2 Hz, 1H), 2.10 (m, 2H), 2.05 – 1.97 (m, 2H), 1.65 – 1.56 (m, 2H), 1.53 (m, 2H), 1.25 (s, 12H), 1.25 (s, 12H), 1.20 (s, 12H).

**<sup>13</sup>C{<sup>1</sup>H} NMR** (126 MHz, CDCl<sub>3</sub>) δ 145.4, 122.4, 83.5, 83.1, 82.8, 28.0, 25.4, 24.9, 24.8, 24.7, 22.6, 22.1. The carbon atoms directly attached to boron were not detected, likely due to quadrupolar broadening.

**<sup>11</sup>B NMR** (160 MHz, CDCl<sub>3</sub>) δ 30.7.

**HRMS** (ASAP): m/z for C<sub>26</sub>H<sub>46</sub>B<sub>3</sub>O<sub>6</sub> [M+H<sup>+</sup>] calcd: 487.3568, found: 487.3565.

## IV. Synthetic Applications of Triborylalkenes

### Selective monoarylation of **2a** yielding **6**

In a glove box, a tube (20 mL) containing Pd(PPh<sub>3</sub>)<sub>4</sub> (30 mg, 0.026 mol), **2a** (129 mg, 0.26 mmol), and 4-iodoanisole (61 mg, 0.26 mmol) was capped with a septum, and the system was evacuated and purged with argon three times. Dried THF (3 mL) and degassed aqueous K<sub>3</sub>PO<sub>4</sub> (520 μL, 1.5 M, 0.78 mmol) were transferred to the system via syringes, and the mixture was stirred at 70 °C for 24 h. After cooling to room temperature, the mixture was filtered through a pad of Celite and washed through with Et<sub>2</sub>O (25 mL). The filtrate was concentrated under vacuum, the residue was purified by flash column chromatography (ethyl acetate: hexanes = 1:10) to yield a white solid.

### (*E*)-2,2'-(1-phenyl-2-(*p*-tolyl)ethene-1,2-diyl)bis(4,4,5,5-tetramethyl-1,3,2-dioxaborolane) (**6a**)

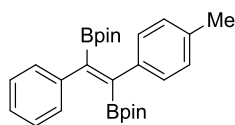

Isolated yield: 78%; White solid, m.p: 137.4 °C.

<sup>1</sup>H NMR (300 MHz, CDCl<sub>3</sub>) δ 7.39 – 7.32 (m, 2H), 7.31 – 7.19 (m, 5H), 7.12 – 7.06 (m, 2H), 2.33 (s, 3H), 1.10 (s, 12H), 1.08 (s, 12H).

<sup>13</sup>C{<sup>1</sup>H} NMR (75 MHz, CDCl<sub>3</sub>) δ 143.4, 140.2, 136.2, 128.6, 128.1, 128.0, 127.9, 126.5, 83.5, 24.6, 21.2. The carbon atoms directly attached to boron were not detected, likely due to quadrupolar broadening.

<sup>11</sup>B NMR (96 MHz, CDCl<sub>3</sub>) δ 30.3.

HRMS (ASAP): m/z for C<sub>27</sub>H<sub>37</sub>B<sub>2</sub>O<sub>4</sub> [M+H<sup>+</sup>] calcd: 447.2872, found: 447.2866

Anal. Calcd for C<sub>27</sub>H<sub>37</sub>B<sub>2</sub>O<sub>4</sub>: C, 72.68; H, 8.73; Found: C, 72.52; H, 8.15.

**(E)-2,2'-(1-(4-methoxyphenyl)-2-phenylethene-1,2-diyl)bis(4,4,5,5-tetramethyl-1,3,2-dioxaborolane) (6b)**

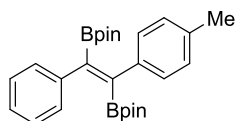

Isolated yield: 68%, White solid, m.p: 179.0 °C.

**<sup>1</sup>H NMR** (500 MHz, CDCl<sub>3</sub>) δ 7.36 – 7.32 (m, 2H), 7.31 – 7.25 (m, 4H), 7.23 – 7.17 (m, 1H), 6.87 – 6.80 (m, 2H), 3.80 (s, 3H), 1.11 (s, 12H), 1.08 (s, 12H).

**<sup>13</sup>C{<sup>1</sup>H} NMR** (126 MHz, CDCl<sub>3</sub>) δ 158.7, 143.4, 135.9, 129.3, 128.1, 127.9, 126.5, 113.4, 83.5, 83.5, 55.3, 24.6, 24.6. The carbon atoms directly attached to boron were not detected, likely due to quadrupolar broadening.

**<sup>11</sup>B NMR** (160 MHz, CDCl<sub>3</sub>) δ 30.8.

**HRMS** (ASAP): m/z for C<sub>27</sub>H<sub>37</sub>B<sub>2</sub>O<sub>5</sub> [M+H<sup>+</sup>] calcd: 463.2822, found: 463.2812

**Difluorination of 2d yielding 7a**

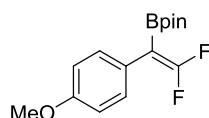

To a solution of **2d** (102.4 mg, 0.2 mmol) in MeCN (2 mL), under argon, Selectfluor (212.6 mg, 3 equiv) and NaHCO<sub>3</sub> (38.2 mg, 2.2 equiv) were added and the reaction mixture was stirred at r.t. for 7 h. The mixture was filtered through a pad of celite and washed through with CH<sub>2</sub>Cl<sub>2</sub> (25 mL). Then the solvent was removed under reduced pressure at room temperature. The residue was purified by column chromatography on silica gel (*n*-pentane: ethyl acetate = 100:1) to yield 55 mg (93%) of a colorless liquid **7a**.

**<sup>1</sup>H NMR** (500 MHz, CDCl<sub>3</sub>) δ 7.22 (m, 2H), 6.87 (m, 2H), 3.80 (s, 3H), 1.31 (s, 12H).

**<sup>13</sup>C{<sup>1</sup>H} NMR** (126 MHz, CDCl<sub>3</sub>) δ 159.5 (dd, *J* = 306, 299 Hz), 158.3, 130.6 (t, *J* = 3 Hz), 124.7 (dd, *J* = 8, 1 Hz), 113.7, 83.9, 55.2, 24.7. The carbon atom directly attached to boron was not detected, likely due to quadrupolar broadening.

**<sup>11</sup>B NMR** (160 MHz, CDCl<sub>3</sub>) δ 30.6.

**<sup>19</sup>F NMR** (471 MHz, CDCl<sub>3</sub>) δ -70.0 (s, br), -72.0 (d, *J* = 5 Hz).

**HRMS** (ASAP): m/z for C<sub>15</sub>H<sub>20</sub>B<sub>1</sub>F<sub>2</sub>O<sub>3</sub> [M+H<sup>+</sup>] calcd: 297.1468, found: 297.1457

## Monochlorination of **2d** yielding **8a**

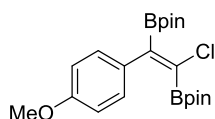

To a solution of **2d** (102.4 mg, 0.2 mmol) in MeCN (1 mL) under argon and protected from light was added NCS (35 mg, 1.3 equiv). The reaction mixture was stirred at 60 °C for 12 h. The mixture was filtered through a pad of celite and washed through with CH<sub>2</sub>Cl<sub>2</sub> (25 mL). Then the solvent was removed under reduced pressure at room temperature. The residue was purified quickly by column chromatography on silica gel (*n*-pentane: ethyl acetate = 50:1) to give the product **8a** as a white solid (59 mg, 70%).

White solid, m.p: 157.4 °C.

**<sup>1</sup>H NMR** (300 MHz, CDCl<sub>3</sub>) δ 7.17 (d, *J* = 9 Hz, 2H), 6.81 (d, *J* = 9 Hz, 2H), 3.79 (s, 3H), 1.31 (s, 12H), 1.17 (s, 12H).

**<sup>13</sup>C{<sup>1</sup>H} NMR** (75 MHz, CDCl<sub>3</sub>) δ 159.2, 131.8, 129.2, 113.5, 84.3, 84.3, 55.2, 24.7, 24.4. The carbon atoms directly attached to boron were not detected, likely due to quadrupolar broadening.

**<sup>11</sup>B NMR** (96 MHz, CDCl<sub>3</sub>) δ 28.2.

**HRMS** (ASAP): *m/z* for C<sub>21</sub>H<sub>32</sub>B<sub>2</sub>Cl<sub>1</sub>O<sub>5</sub> [M+H<sup>+</sup>] calcd: 421.2119, found: 421.2112

**Anal. Calcd** for C<sub>21</sub>H<sub>32</sub>B<sub>2</sub>Cl<sub>1</sub>O<sub>5</sub>: C, 59.98; H, 7.43; Found: C, 59.67; H, 7.58.

## Dibromination of **2d** yielding **9a**

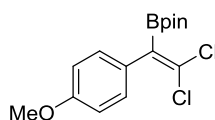

To a solution of **2d** (102.4 mg, 0.2 mmol) in MeCN (1 mL) under argon and protected from light was added NCS (53.4 mg, 2 equiv). The reaction mixture was stirred at 60 °C for 48 h. The mixture was filtered through a pad of celite and washed through with CH<sub>2</sub>Cl<sub>2</sub> (25 mL). Then the solvent was removed under reduced pressure at room temperature. The residue was purified quickly by column chromatography on silica gel (*n*-pentane: diethyl ether = 100:1) to yield 34 mg (53%) of a colorless liquid **9a**.

**<sup>1</sup>H NMR** (300 MHz, CDCl<sub>3</sub>) δ 7.24 (d, *J* = 9 Hz, 2H), 6.88 (d, *J* = 9 Hz, 2H), 3.81 (s, 3H), 1.30 (s, 12H).

**<sup>13</sup>C{<sup>1</sup>H} NMR** (75 MHz, CDCl<sub>3</sub>) δ 158.9, 129.6, 129.5, 125.2, 113.7, 84.6, 55.2, 24.6. The carbon atoms directly attached to boron were not detected, likely due to quadrupolar broadening.

**<sup>11</sup>B NMR** (96 MHz, CDCl<sub>3</sub>) δ 29.4.

**HRMS** (ASAP): *m/z* for C<sub>15</sub>H<sub>20</sub>B<sub>1</sub>Cl<sub>2</sub>O<sub>3</sub> [M+H<sup>+</sup>] calcd: 329.0877, found: 329.0867.

### Monobromination of **2** yielding **10**

To a solution of **2** (0.2 mmol) in MeCN (1 mL) under argon and protected from light was added N-bromosuccinimide (46.3 mg, 1.3 equiv). The reaction mixture was stirred at r.t. for 72 h, and then washed with a saturated solution of Na<sub>2</sub>S<sub>2</sub>O<sub>3</sub> (10 mL). The organic phase was extracted with CH<sub>2</sub>Cl<sub>2</sub> (3 x 10 mL), dried over MgSO<sub>4</sub> and filtered. The solvent was removed under vacuum and the residue was purified by column chromatography on silica gel (*n*-pentane: ethyl acetate = 50:1) to give the product **10a** as a white solid (67 mg, 75%).

### (*E*)-2,2'-(1-bromo-2-(*p*-tolyl)ethene-1,2-diyl)bis(4,4,5,5-tetramethyl-1,3,2-dioxaborolane) (**10a**)

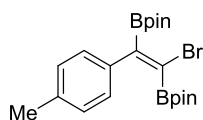

Isolated yield: 75%; White solid, m.p: 200.7 °C.

**<sup>1</sup>H NMR** (300 MHz, CDCl<sub>3</sub>) δ 7.14 (d, *J* = 8 Hz, 2H), 7.07 (d, *J* = 8 Hz, 2H), 2.31 (s, 3H), 1.32 (s, 12H), 1.16 (s, 12H).

**<sup>13</sup>C{<sup>1</sup>H} NMR** (75 MHz, CDCl<sub>3</sub>) δ 137.8, 137.2, 128.8, 127.4, 84.3, 84.3, 24.7, 24.3, 21.2. The carbon atoms directly attached to boron were not detected, likely due to quadrupolar broadening.

**<sup>11</sup>B NMR** (96 MHz, CDCl<sub>3</sub>) δ 28.5.

**HRMS** (ASAP): *m/z* for C<sub>21</sub>H<sub>32</sub>B<sub>2</sub>Br<sub>1</sub>O<sub>4</sub> [M+H<sup>+</sup>] calcd: 449.1665, found: 449.1661

**Anal. Calcd** for C<sub>21</sub>H<sub>31</sub>B<sub>2</sub>BrO<sub>4</sub>: C, 56.18; H, 6.96; Found: C, 56.83; H, 7.13.



**(E)-2,2'-(1-bromo-2-(4-methoxyphenyl)ethene-1,2-diyl)bis(4,4,5,5-tetramethyl-1,3,2-dioxaborolane) (10b)**

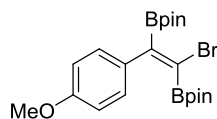

Reaction time: 2 h; Isolated yield: 70%; White solid, m.p: 249.0 °C.

**<sup>1</sup>H NMR** (500 MHz, CDCl<sub>3</sub>) δ 7.19 (d, *J* = 9 Hz, 2H), 6.80 (d, *J* = 9 Hz, 2H), 3.78 (s, 3H), 1.32 (s, 12H), 1.17 (s, 12H).

**<sup>13</sup>C{<sup>1</sup>H} NMR** (126 MHz, CDCl<sub>3</sub>) δ 159.2, 133.3, 128.8, 113.6, 84.3, 84.3, 55.2, 24.8, 24.3. The carbon atoms directly attached to boron were not detected, likely due to quadrupolar broadening.

**<sup>11</sup>B NMR** (160 MHz, CDCl<sub>3</sub>) δ 28.1.

**HRMS** (ASAP): *m/z* for C<sub>21</sub>H<sub>32</sub>B<sub>2</sub>Br<sub>1</sub>O<sub>5</sub> [M+H<sup>+</sup>] calcd: 465.1614, found: 465.1613

**Anal. Calcd** for C<sub>21</sub>H<sub>31</sub>B<sub>2</sub>BrO<sub>5</sub>: C, 54.24; H, 6.72; Found: C, 54.87; H, 6.79.

**Dibromination of 2d yielding 11a**

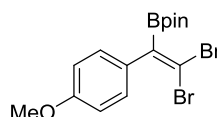

To a solution of **2d** (102.4 mg, 0.2 mmol) in MeCN (1 mL) under argon and protected from light was added N-bromosuccinimide (71.2 mg, 2 equiv). The reaction mixture was stirred at r.t. for 72 h. The mixture was filtered through a pad of celite and washed through with CH<sub>2</sub>Cl<sub>2</sub> (25 mL). Then the solvent was removed under reduced pressure at room temperature. The residue was purified quickly by column chromatography on silica gel (*n*-pentane: diethyl ether = 20:1) to yield 74 mg (86%) of a colorless liquid **11a**.

**<sup>1</sup>H NMR** (300 MHz, CDCl<sub>3</sub>) δ 7.22 (m, 2H), 6.88 (m, 2H), 3.81 (s, 3H), 1.29 (s, 12H).

**<sup>13</sup>C{<sup>1</sup>H} NMR** (75 MHz, CDCl<sub>3</sub>) δ 158.9, 132.1, 129.0, 113.8, 94.2, 84.7, 55.2, 24.6.

The carbon atoms directly attached to boron were not detected, likely due to quadrupolar broadening.

**<sup>11</sup>B NMR** (96 MHz, CDCl<sub>3</sub>) δ 29.6.

**HRMS** (ASAP): *m/z* for C<sub>15</sub>H<sub>20</sub>B<sub>1</sub>Br<sub>2</sub>O<sub>3</sub> [M+H<sup>+</sup>] calcd: 418.9846, found: 418.9841.

## V. Investigations Concerning the Reaction Mechanism

### Evidence for an alkynylboronate intermediate

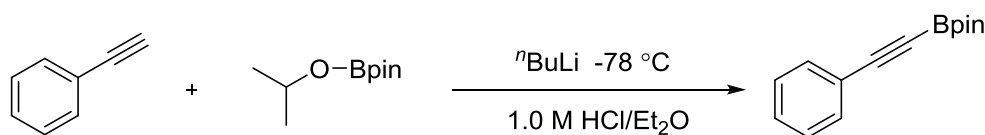

**Synthesis of 4,4,5,5-tetramethyl-2-(phenylethynyl)-1,3,2-dioxaborolane (4a):**<sup>[2]</sup> A solution of phenylacetylene (1.32 mL, 12 mmol) in THF (30 mL) in a 50 mL of Schlenk tube was cooled to  $-78\text{ }^\circ\text{C}$  and, under an argon atmosphere  $n\text{BuLi}$  (7.5 mL, 1.6 M hexane solution, 12 mmol) was added dropwise. The reaction mixture was stirred for 1 h at  $-78\text{ }^\circ\text{C}$ . The resulting reaction mixture was then added to a solution of 4,4,5,5-tetramethyl-2-(isopropoxy)-1,3,2-dioxaborolane (2.04 mL, 10 mmol) in THF (30 mL) at  $-78\text{ }^\circ\text{C}$ . After being stirred for 2 h at  $-78\text{ }^\circ\text{C}$ , the reaction mixture was quenched with 1.0 M HCl/Et<sub>2</sub>O (12.6 mL, 12.6 mmol), and the mixture was warmed to room temperature with additional stirring for 1 h. Filtration and evaporation afforded a pale yellow oil. Bulb to bulb distillation ( $160\text{ }^\circ\text{C}/2\text{ Torr}$ ) gave **4a** (1.98 g, 8.7 mmol, 87% yield) as a white solid.

$^1\text{H NMR}$  (300 MHz,  $\text{CDCl}_3$ )  $\delta$  7.63 – 7.46 (m, 2H), 7.39 – 7.28 (m, 3H), 1.32 (s, 12H).

$^{13}\text{C}\{^1\text{H}\}\text{NMR}$  (75 MHz,  $\text{CDCl}_3$ )  $\delta$  132.5, 129.4, 128.3, 121.8, 84.4, 24.7.

$^{11}\text{B NMR}$  (96 MHz,  $\text{CDCl}_3$ )  $\delta$  24.2.

Its spectroscopic data are consistent with a literature report.<sup>[2]</sup>

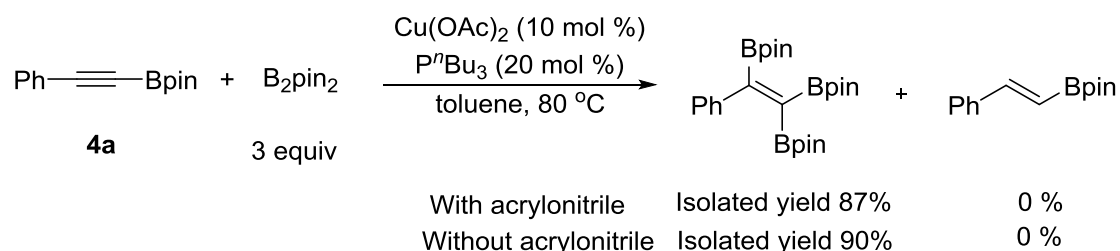

### Scheme S2: Diboration of alkynylboronate.

In a 10 mL thick-walled reaction tube equipped with a magnetic stirring bar,  $\text{Cu}(\text{OAc})_2$  (10 mol %, 3.6 mg, 0.02 mmol),  $\text{B}_2\text{pin}_2$  (3 equiv, 152.4 mg, 0.6 mmol) and toluene (1 mL) were added. Then, 1-alkynyl-dioxaborolane **4a** (45.6 mg, 0.2 mmol), acrylonitrile

(10.6 mg, 13  $\mu$ L, 0.2 mmol) (or without acrylonitrile) and  $P^nBu_3$  (8.1 mg, 9.9  $\mu$ L, 0.04 mmol) were added in this order. The reaction was heated at 80  $^{\circ}C$  under argon for 4 h, and then diluted with  $Et_2O$  (4 mL) and filtered through a plug of celite ( $\varnothing$  3 mm  $\times$  8 mm) with copious washing ( $Et_2O$ ). The solvents were removed *in vacuo*, and the residue was purified by column chromatography on silica gel (pentane: ethyl acetate = 25:1).

#### **Evidence for the formation of R-C<sub>6</sub>H<sub>4</sub>-C $\equiv$ C-Bpin (4j, R = F) as a reaction intermediate**

In a Young's tap NMR tube,  $Cu(OAc)_2$  (10 mol %, 1.8 mg, 0.01 mmol),  $B_2pin_2$  (3 equiv, 76.2 mg, 0.3 mmol) and toluene (0.7 mL) were added. Then, alkyne **1j** (12 mg, 0.1 mmol), acrylonitrile (5.3 mg, 6.5  $\mu$ L, 0.1 mmol) and  $P^nBu_3$  (4 mg, 4.5  $\mu$ L, 0.02 mmol) were added in this order. The mixture was kept under argon at 80  $^{\circ}C$ . The formation of **4j** was detected by *in situ*  $^{19}F$  NMR spectroscopy and GC/MS (Figure S1).

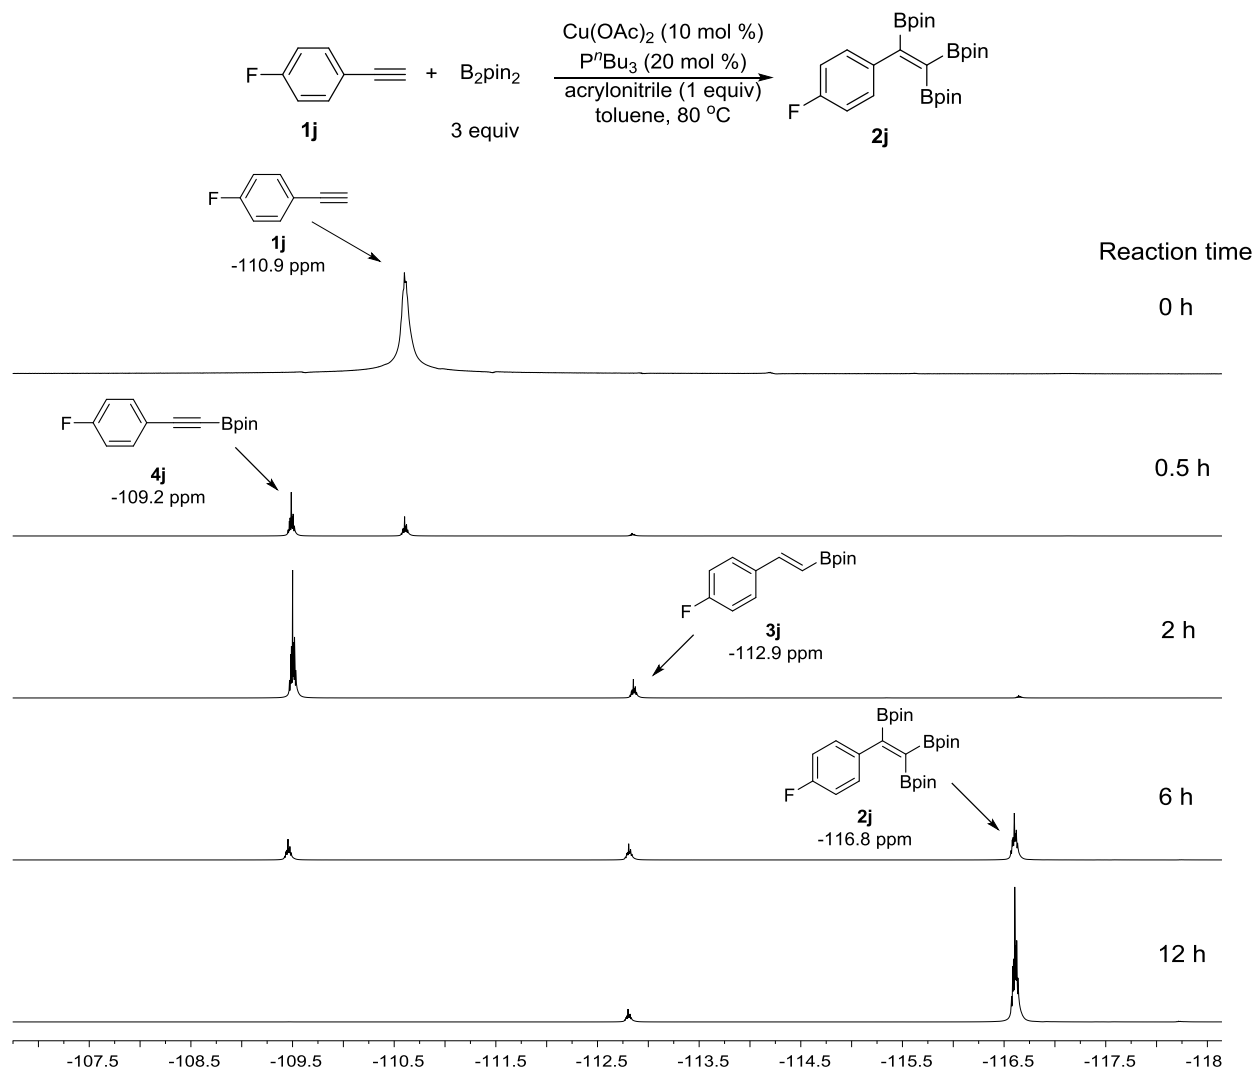

**Figure S1 (a).** Reaction progress monitored by *in situ*  $^{19}\text{F}$  NMR spectroscopy (471 MHz)

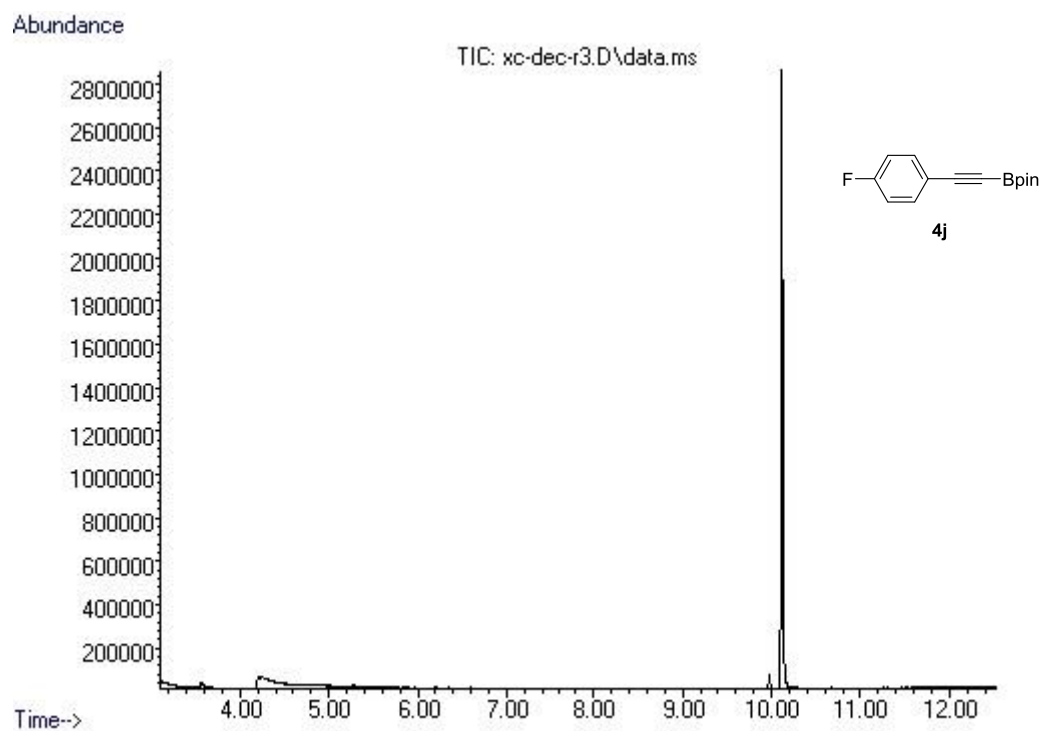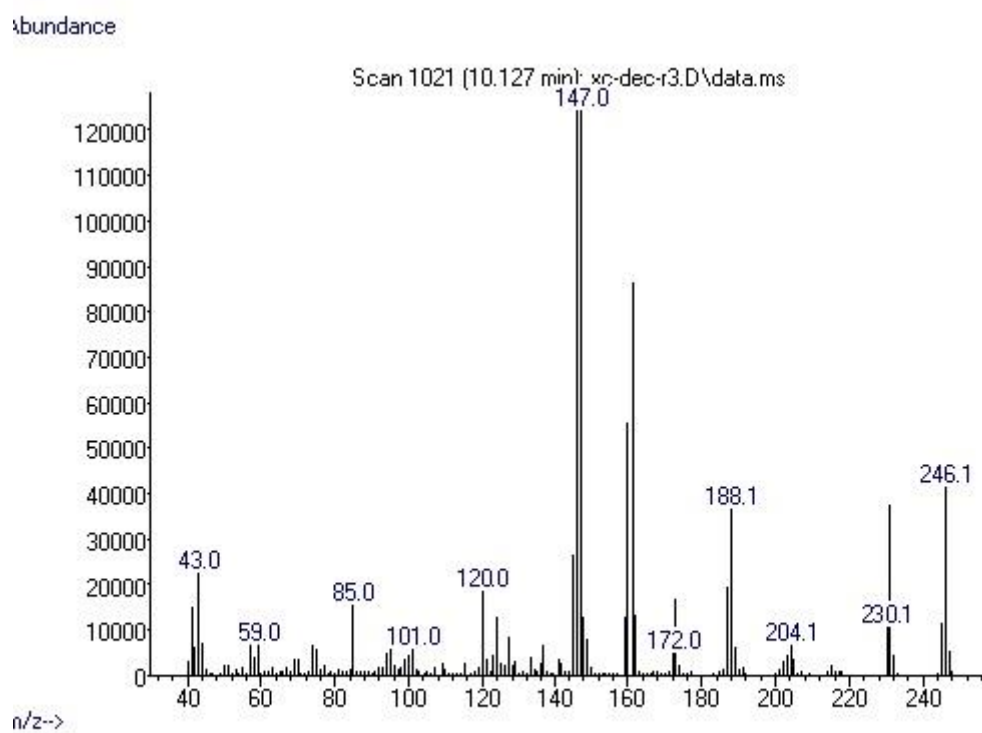

**Figure S1 (b).** GC/MS of an authentic sample of **4j** ( $m/z$  for  $C_{14}H_{16}BFO_2$   $[M]^+$  calcd: 246, found: 246) prepared using the method described in: E. A. Romero, R. Jazzar, G. Bertrand, *Chem. Sci.* **2017**, *8*, 165-168.

-108.99  
-109.00  
-109.00  
-109.01  
-109.01  
-109.02  
-109.02  
-109.03  
-109.04

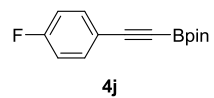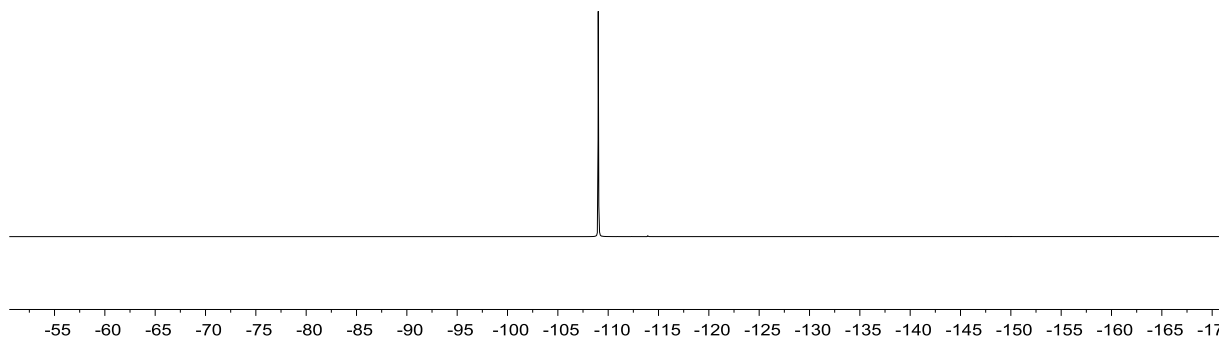

**Figure S1 (c).**  $^{19}\text{F}$  NMR (471 MHz, toluene) spectrum of authentic **4j** ( $\delta$  -109.0; td,  $J$  = 9, 5 Hz).

## Deuterium labeling studies

Deuterium labeling studies were conducted using 1-deutero-2-phenylethyne **1a-d** as the substrate (the level of deuterium content was 90%, as shown below in **Figure S2**) under the standard reaction conditions.<sup>[3]</sup> The reaction gave **3a-d<sub>1</sub>**, **3a-d<sub>2</sub>**, **3a-d<sub>3</sub>**, and **3a** in a 2:1:5:2 ratio (see NMR spectrum in **Figure S3**). HRMS analysis indicated the formation of **5-d** (see **Figure S4**).

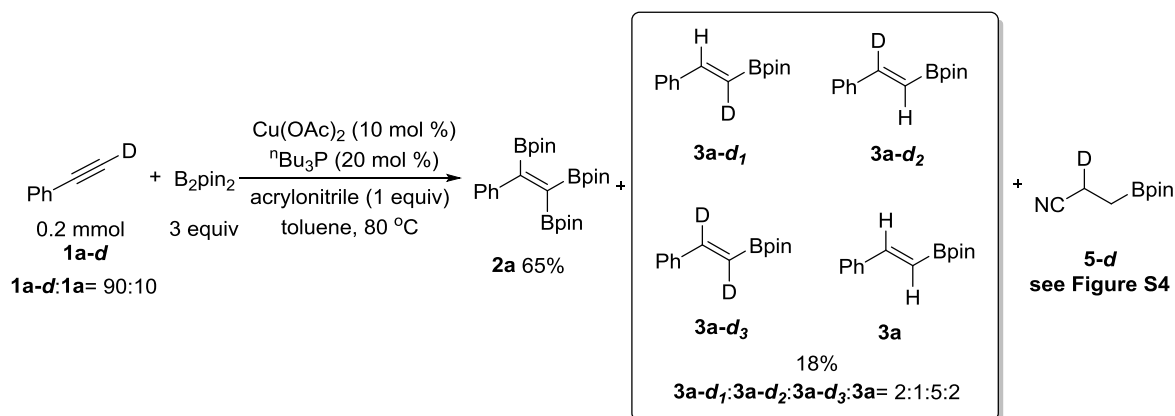

**Scheme S3.** Deuterium labeling studies

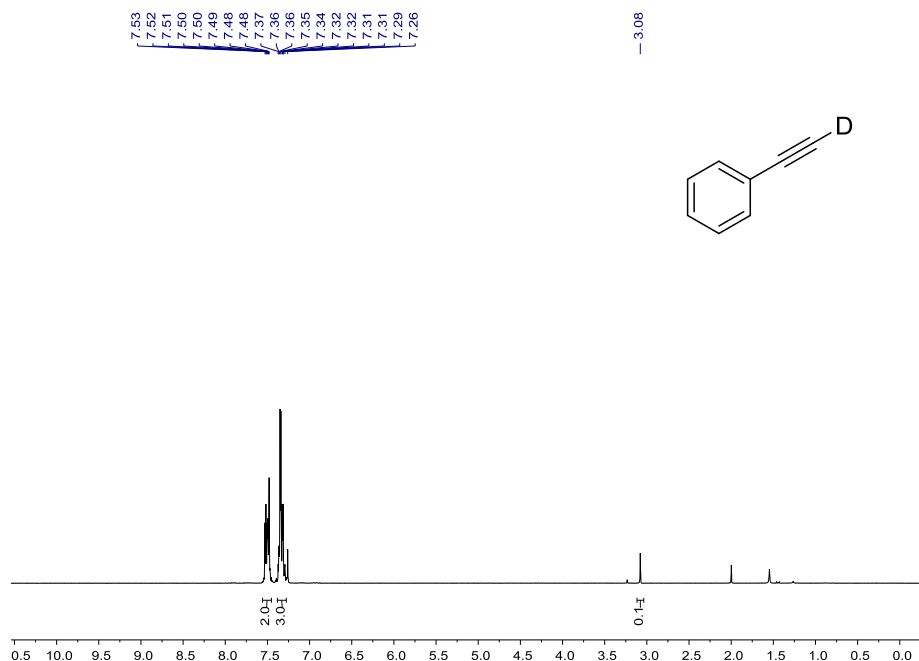

**Figure S2.** <sup>1</sup>H NMR spectrum of **1a-d**. <sup>1</sup>H NMR (200 MHz, CDCl<sub>3</sub>)  $\delta$  7.6 – 7.4 (m, 2H), 7.4 – 7.3 (m, 3H), 3.1 (s, 0.1H).

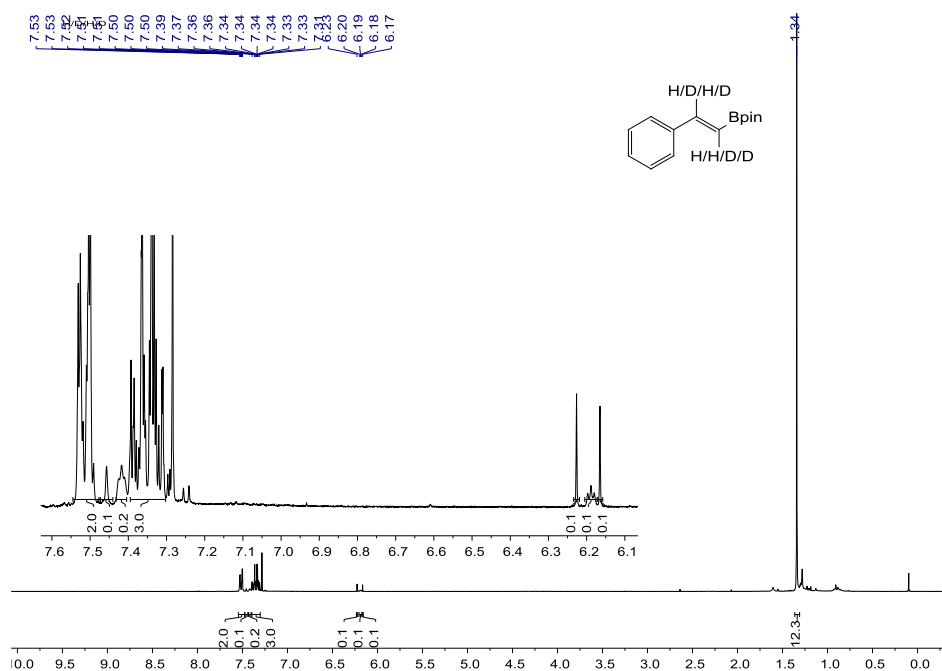

Figure S3. <sup>1</sup>H NMR spectrum of 3a (300 MHz, CDCl<sub>3</sub>).

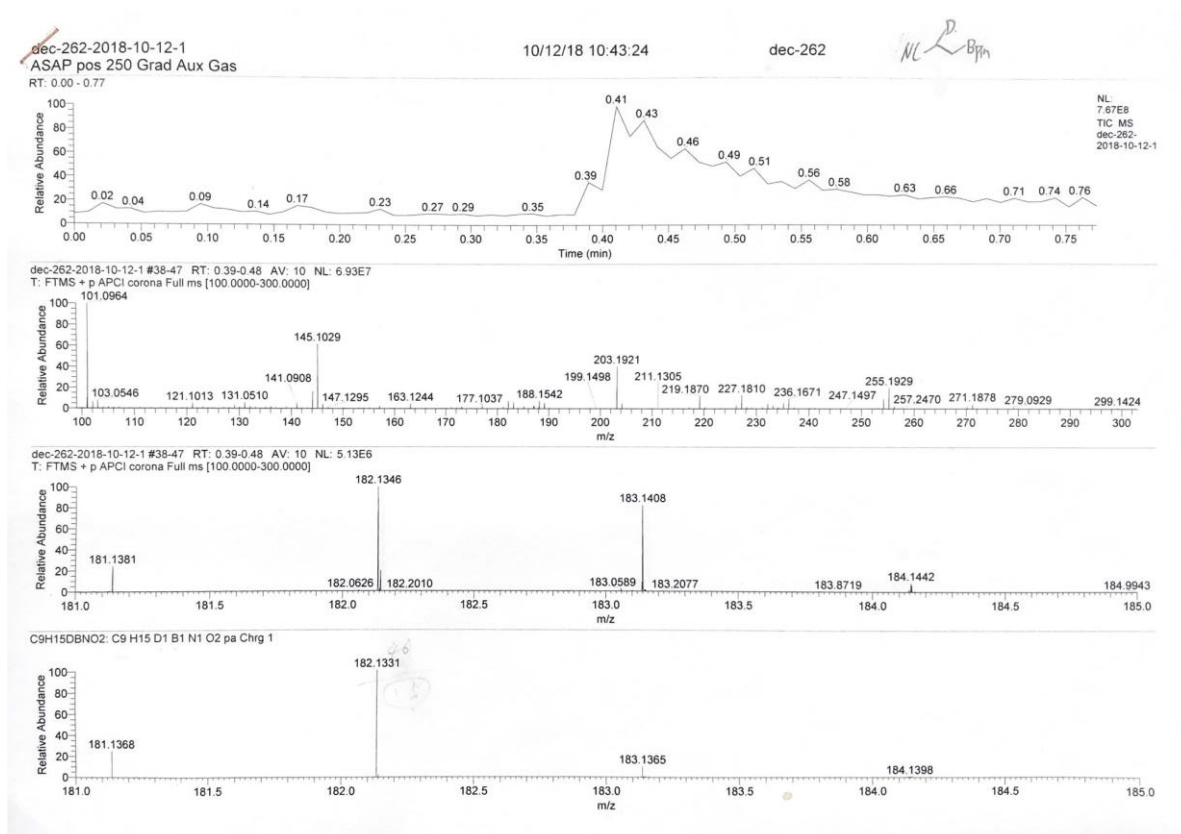

Figure S4. HRMS (ASAP) of 5-d: m/z for C<sub>9</sub>H<sub>15</sub>DBNO<sub>2</sub> [M<sup>+</sup>] calcd: 182.1331, found: 182.1346.



## VI. NMR Spectra

$^1\text{H}$  NMR spectrum (500 MHz,  $\text{CDCl}_3$ ) of **2a**

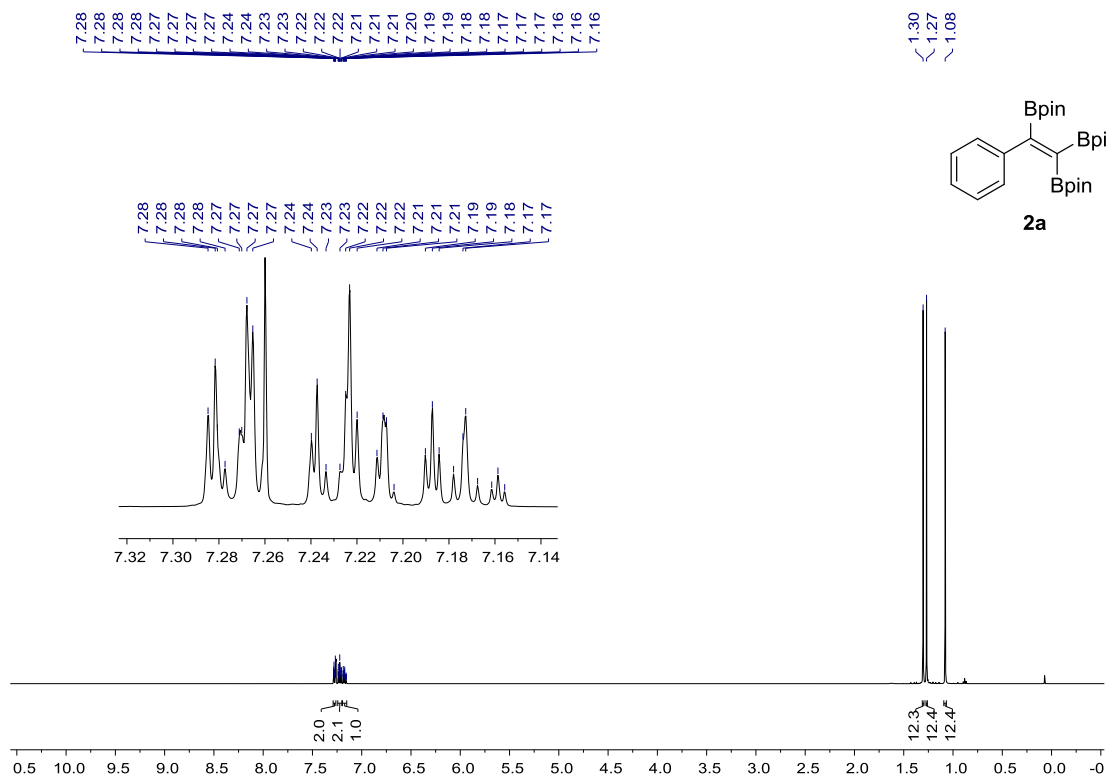

$^{13}\text{C}\{^1\text{H}\}$  NMR spectrum (125 MHz,  $\text{CDCl}_3$ ) of **2a**

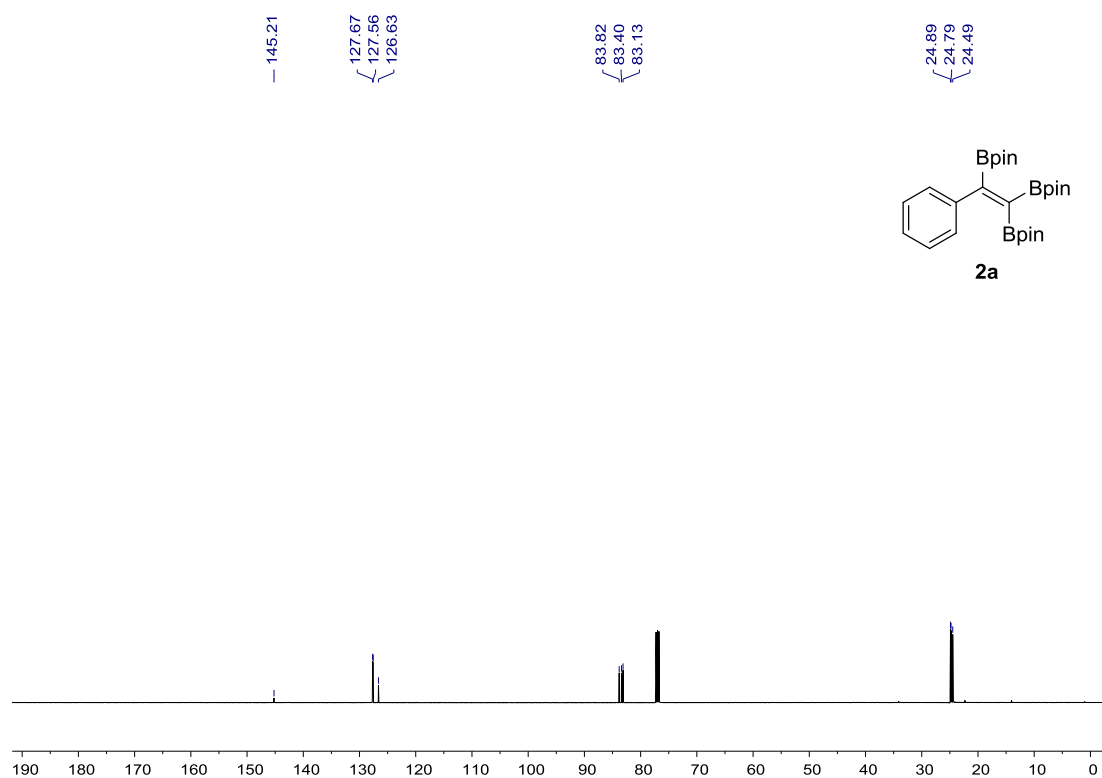

$^{11}\text{B}$  NMR spectrum (160 MHz,  $\text{CDCl}_3$ ) of **2a**

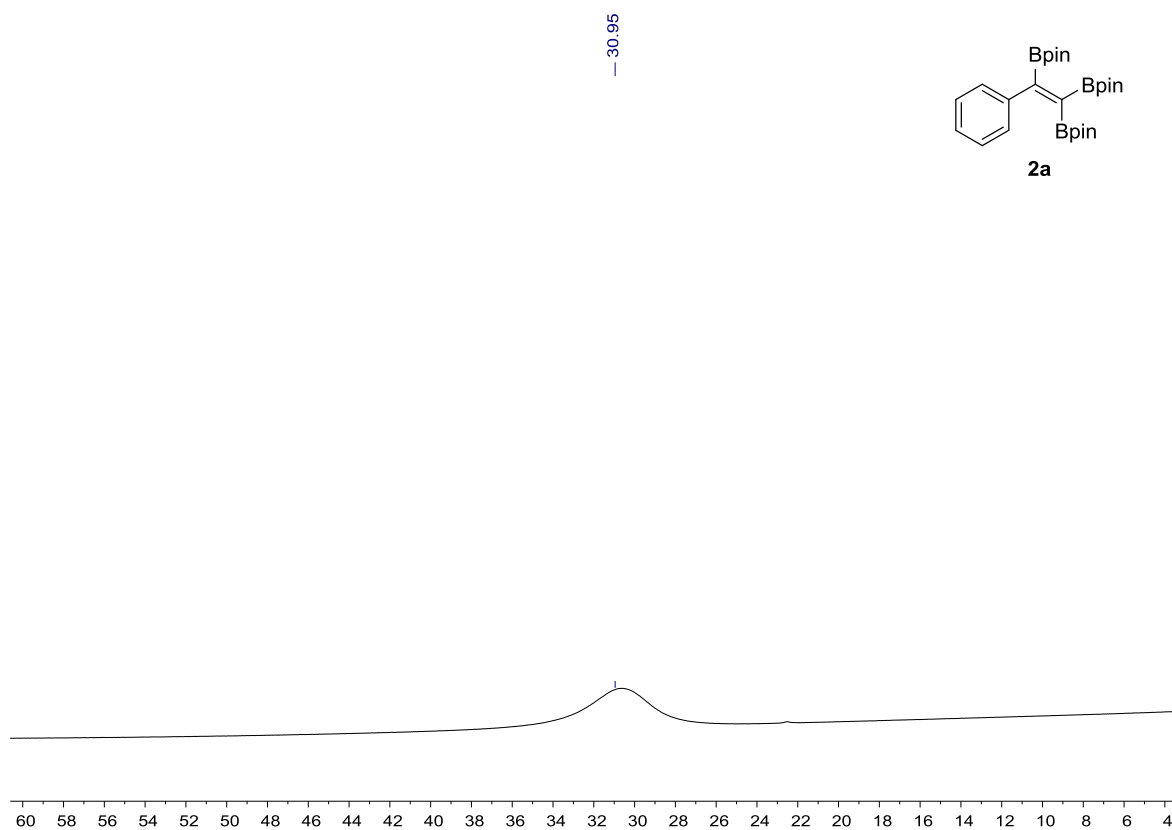

$^1\text{H}$  NMR spectrum (500 MHz,  $\text{CDCl}_3$ ) of **2b**

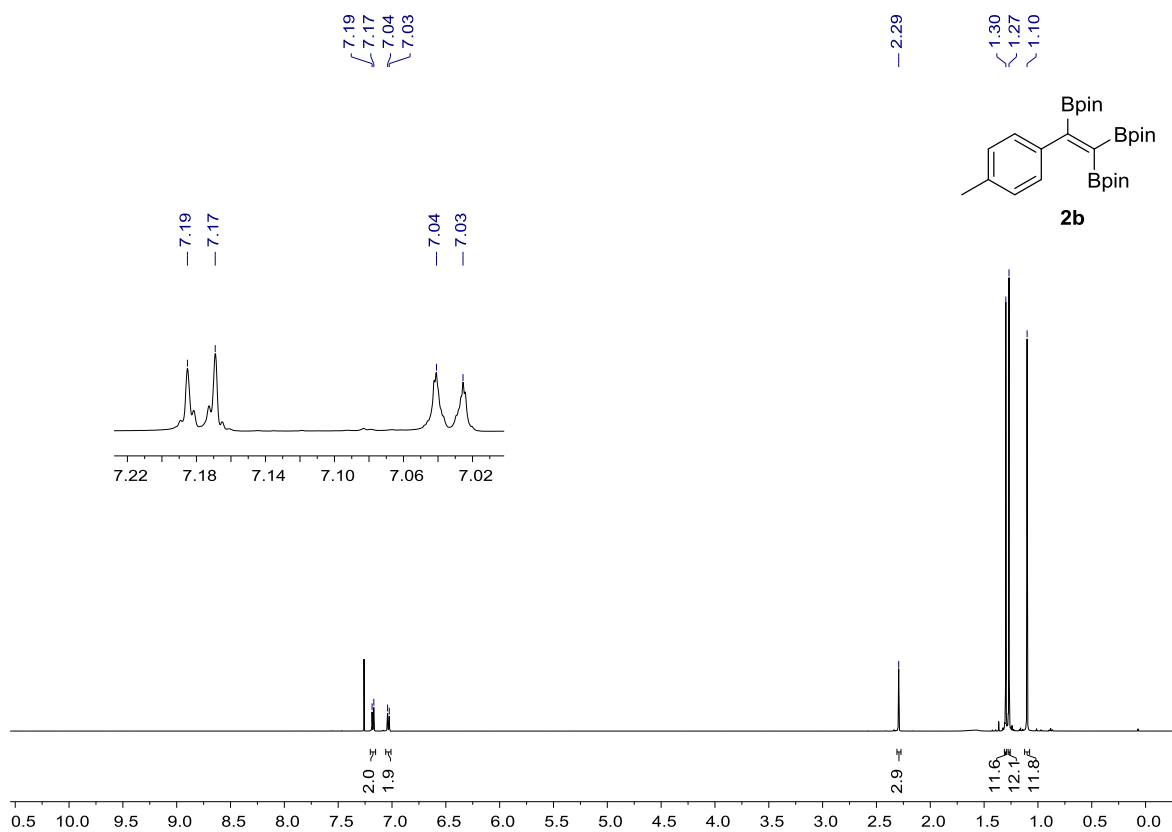

$^{13}\text{C}\{^1\text{H}\}$  NMR spectrum (125 MHz,  $\text{CDCl}_3$ ) of **2b**

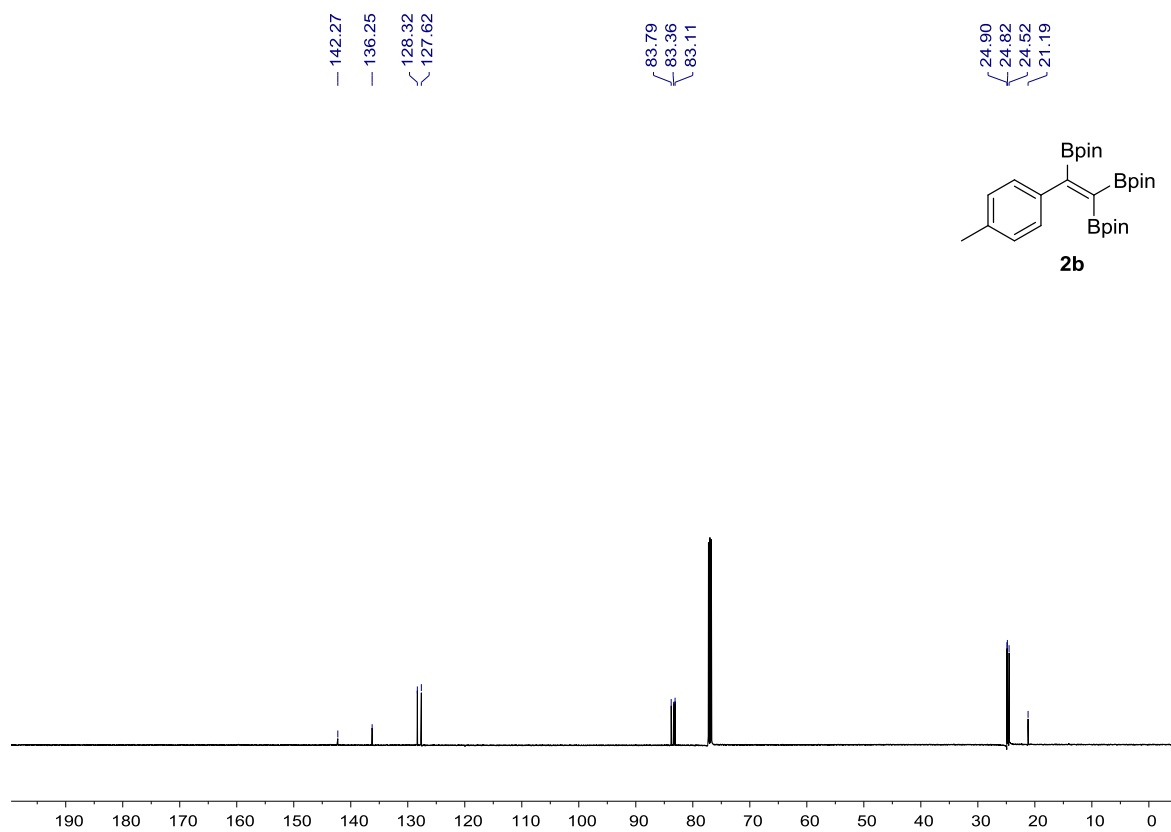

$^{11}\text{B}$  NMR spectrum (160 MHz,  $\text{CDCl}_3$ ) of **2b**

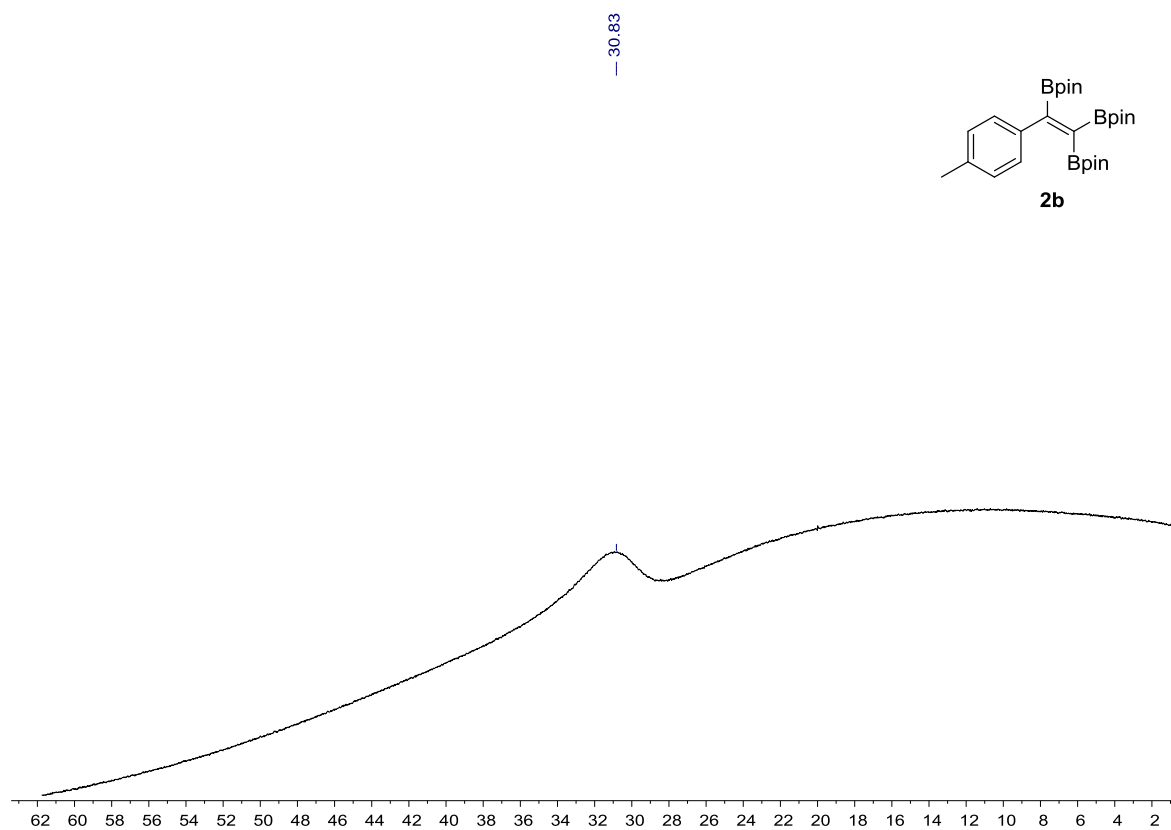

<sup>1</sup>H NMR spectrum (500 MHz, CDCl<sub>3</sub>) of **2c**

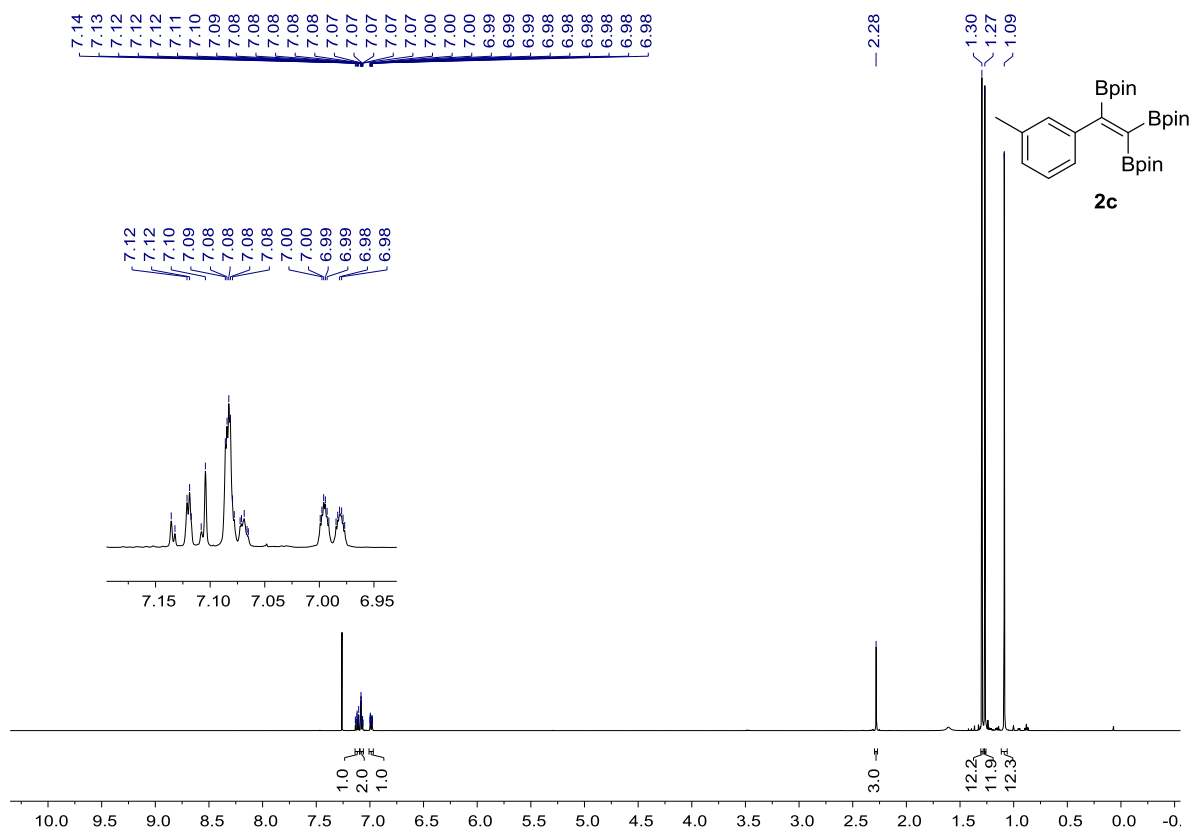

<sup>13</sup>C{<sup>1</sup>H} NMR spectrum (125 MHz, CDCl<sub>3</sub>) of **2c**

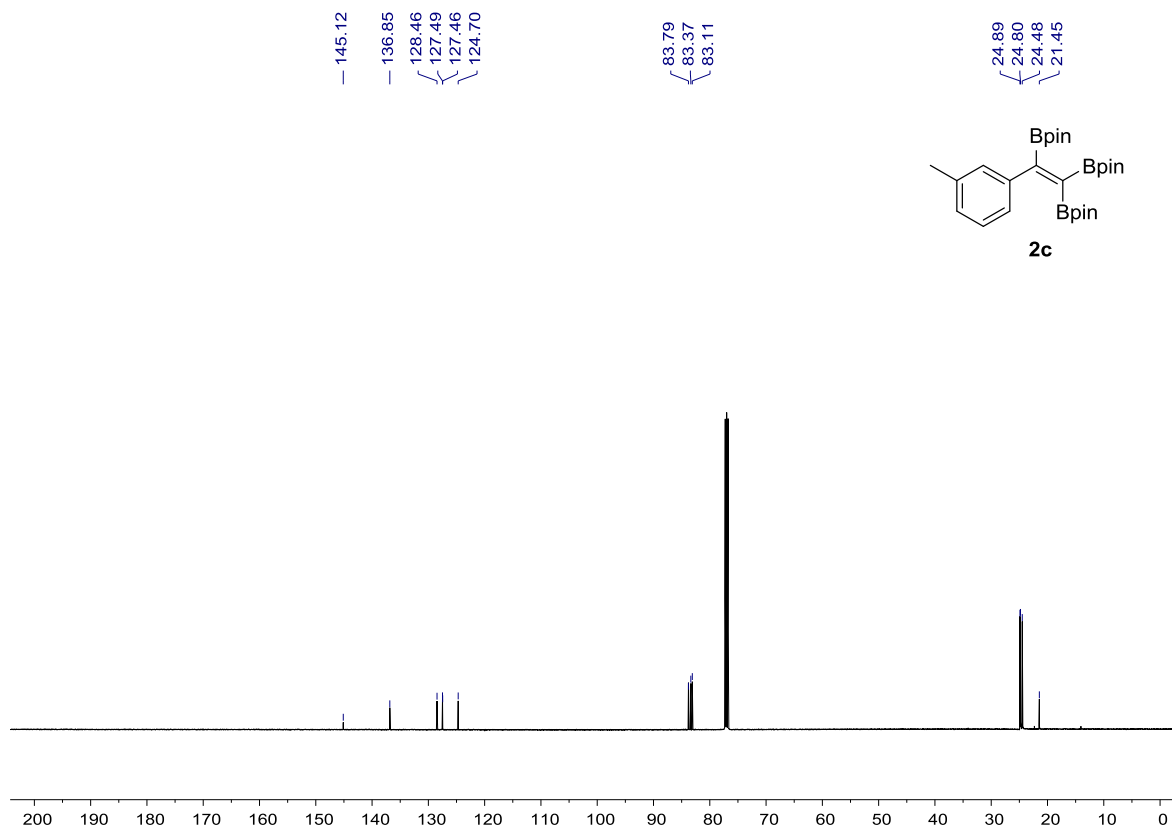



$^{13}\text{C}\{^1\text{H}\}$  NMR spectrum (125 MHz,  $\text{CDCl}_3$ ) of **2d**

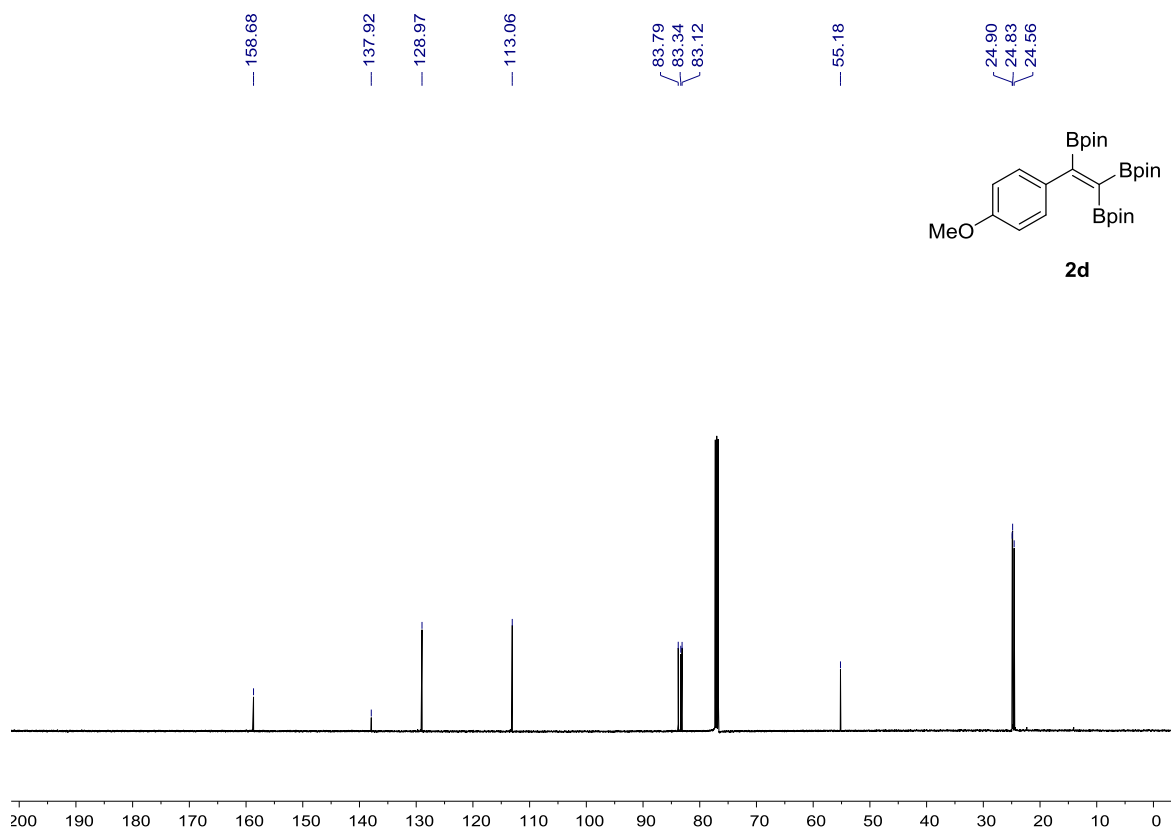

$^{11}\text{B}$  NMR spectrum (160 MHz,  $\text{CDCl}_3$ ) of **2d**

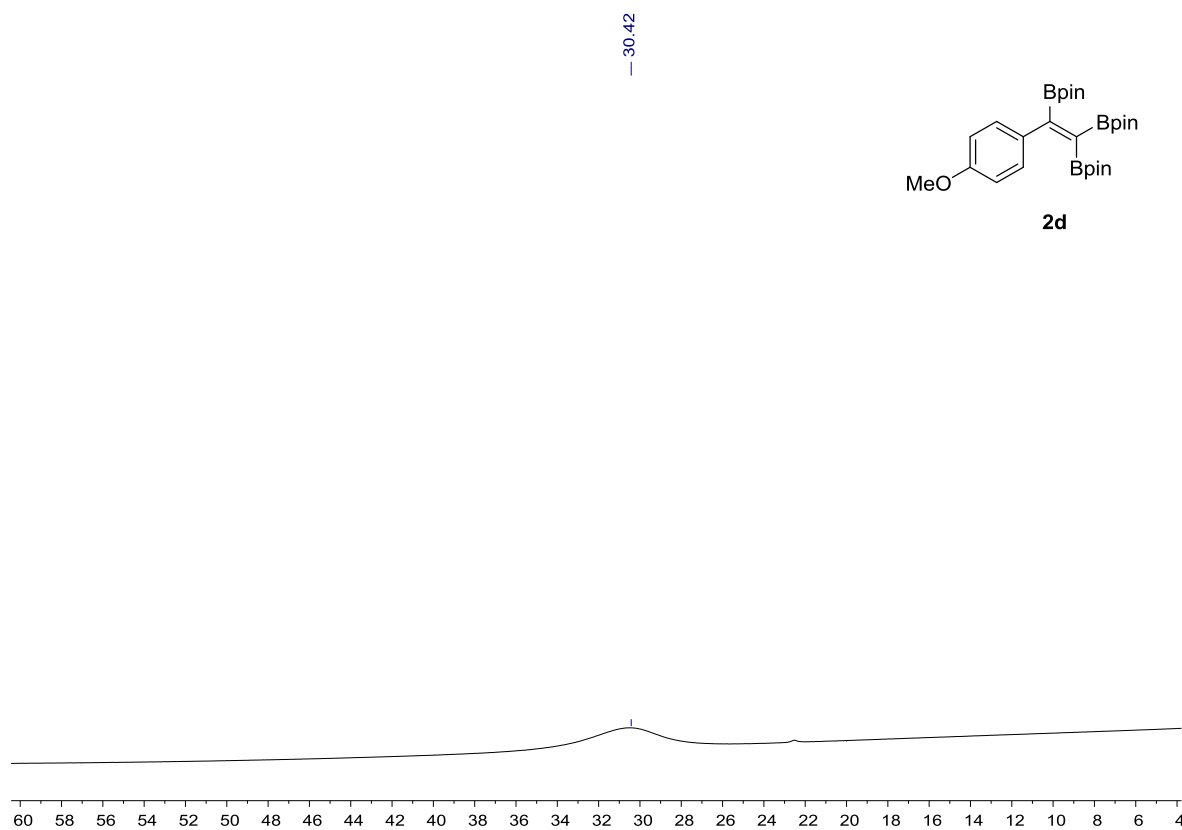

<sup>1</sup>H NMR spectrum (500 MHz, CDCl<sub>3</sub>) of **2e**

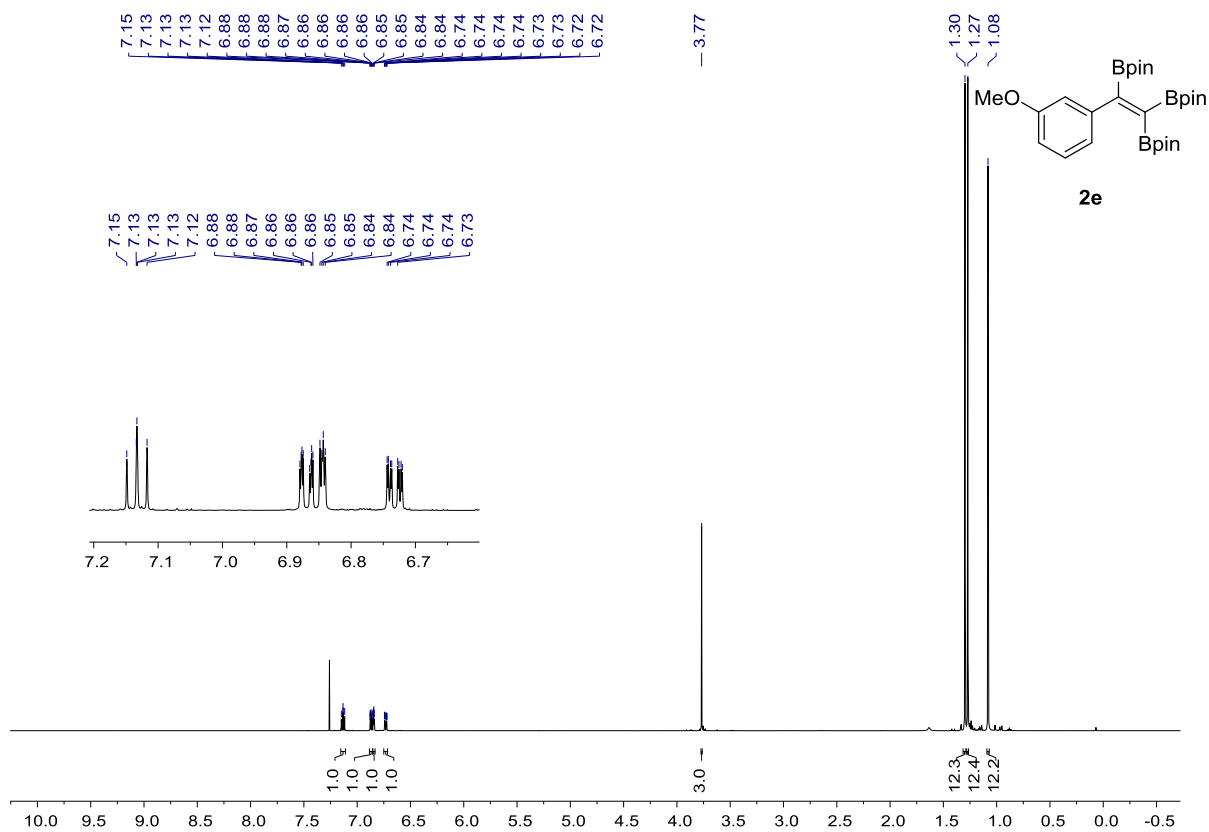

<sup>13</sup>C{<sup>1</sup>H} NMR spectrum (125 MHz, CDCl<sub>3</sub>) of **2e**

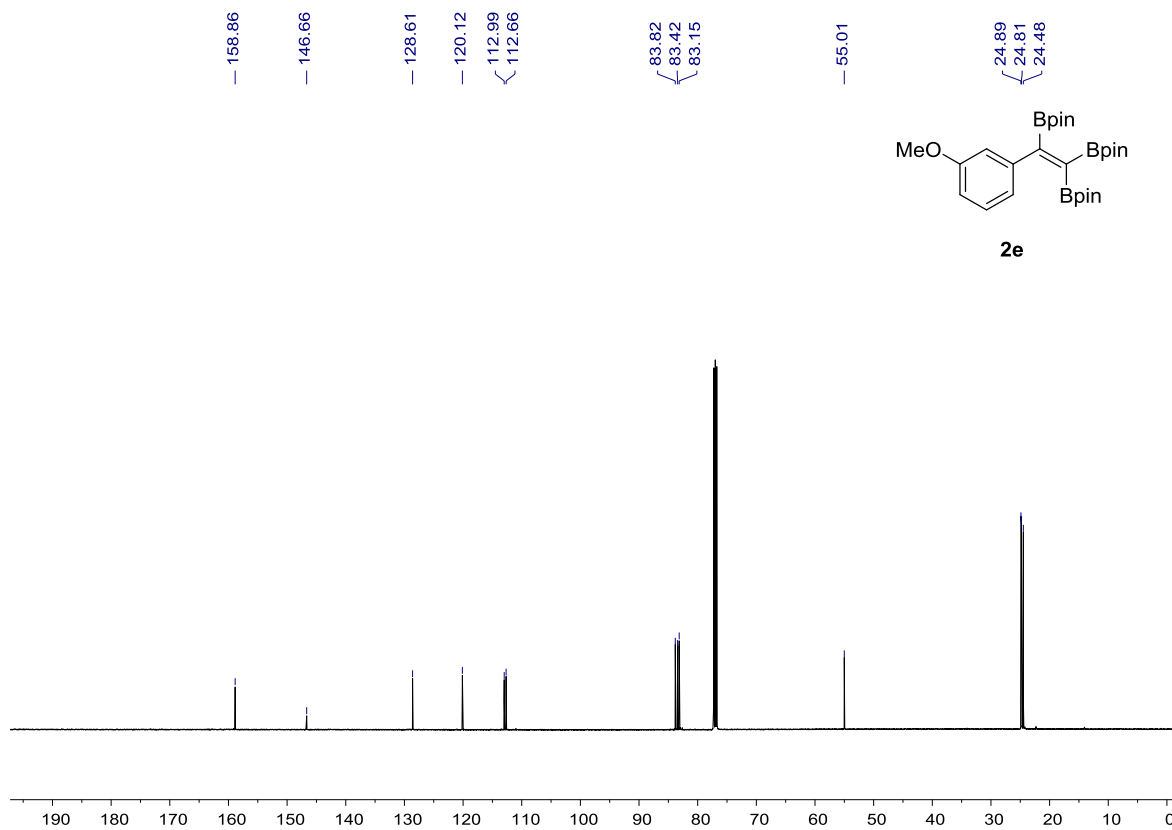

$^{11}\text{B}$  NMR spectrum (160 MHz,  $\text{CDCl}_3$ ) of **2e**

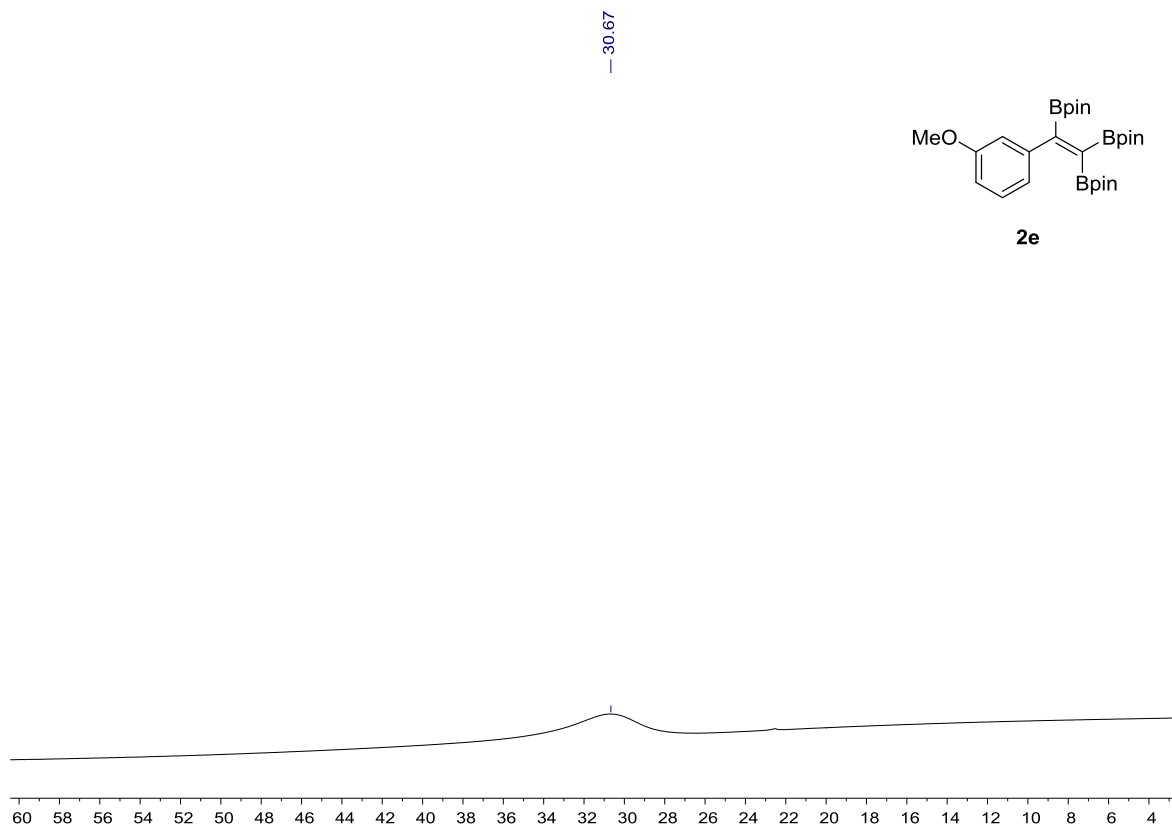

$^1\text{H}$  NMR spectrum (500 MHz,  $\text{CDCl}_3$ ) of **2f**

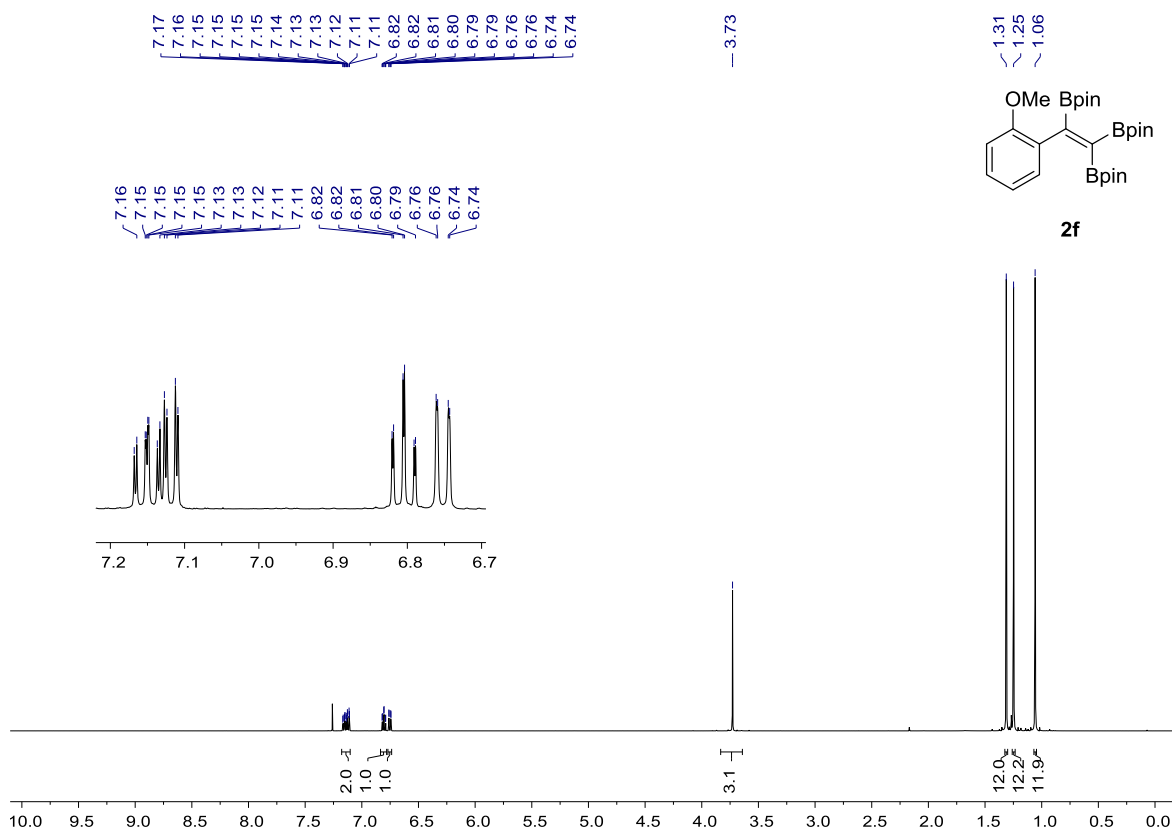



$^{13}\text{C}\{^1\text{H}\}$  NMR spectrum (125 MHz,  $\text{CDCl}_3$ ) of **2f**

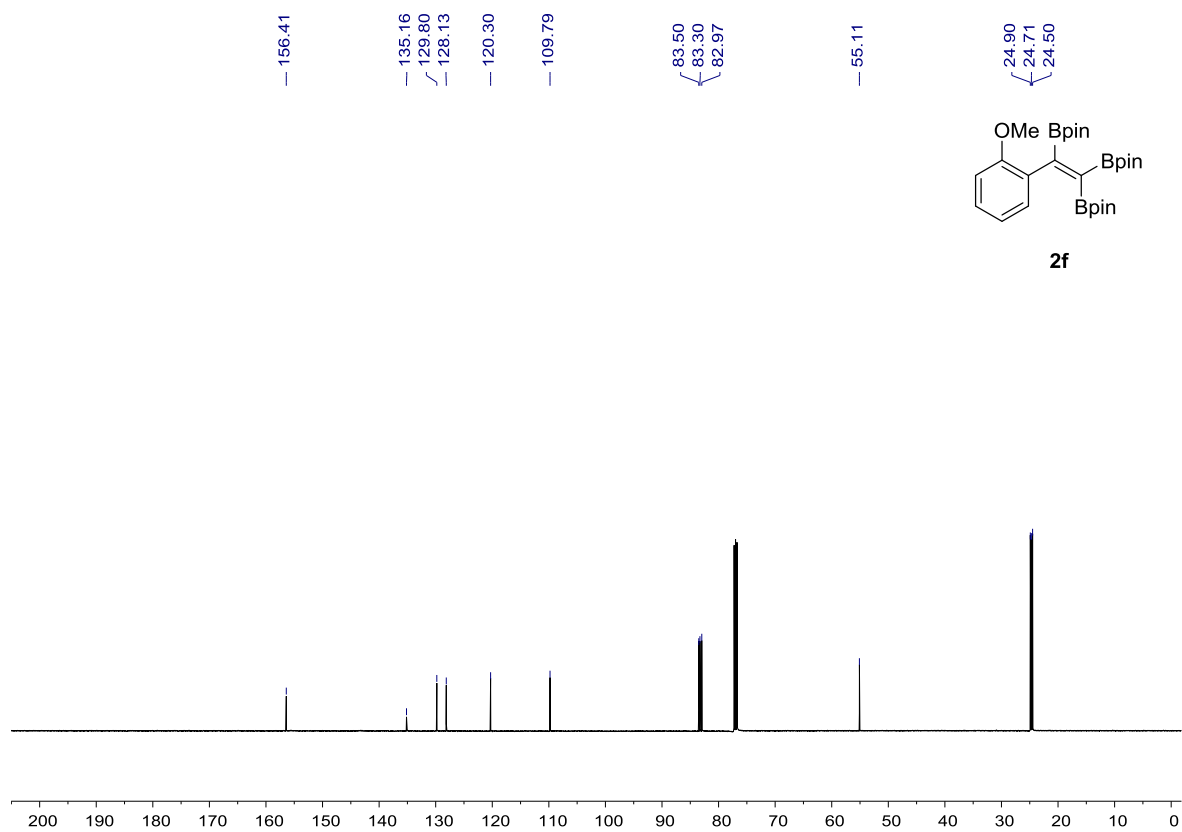

$^{11}\text{B}$  NMR spectrum (160 MHz,  $\text{CDCl}_3$ ) of **2f**

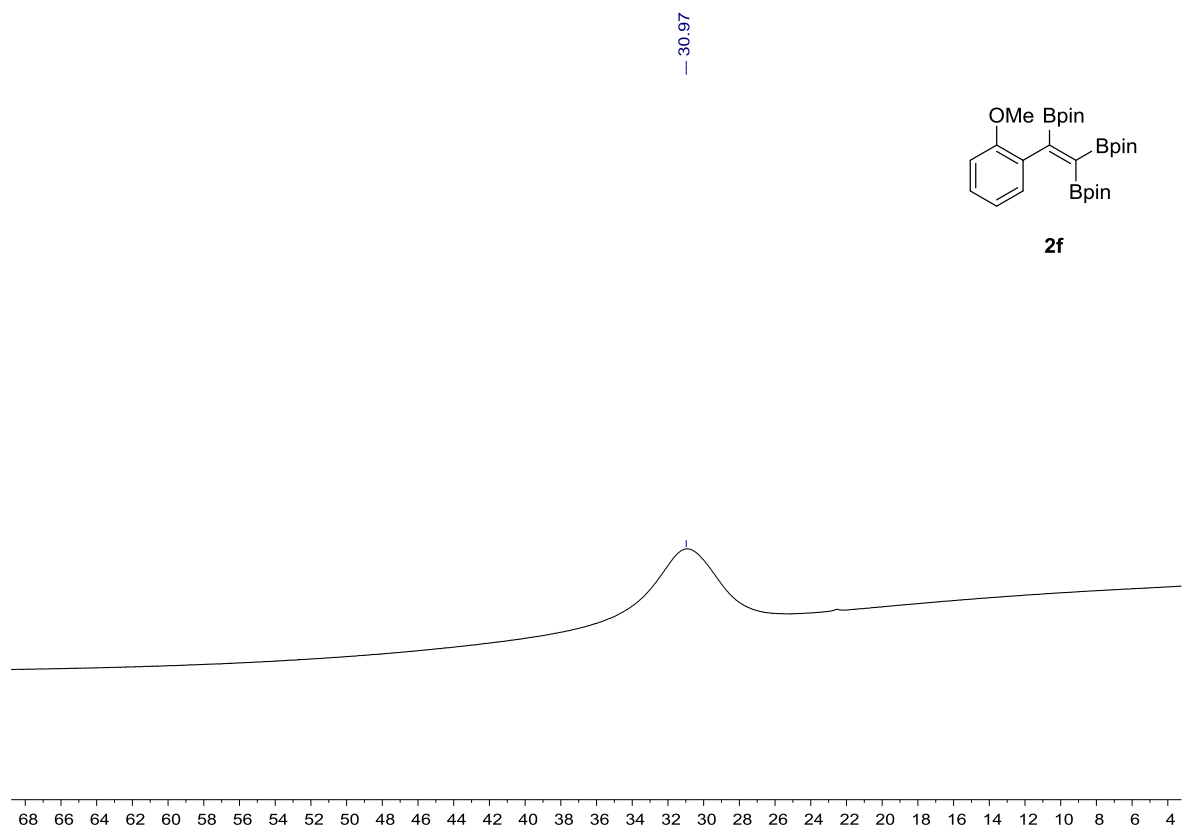

$^1\text{H}$  NMR spectrum (500 MHz,  $\text{CDCl}_3$ ) of **2g**

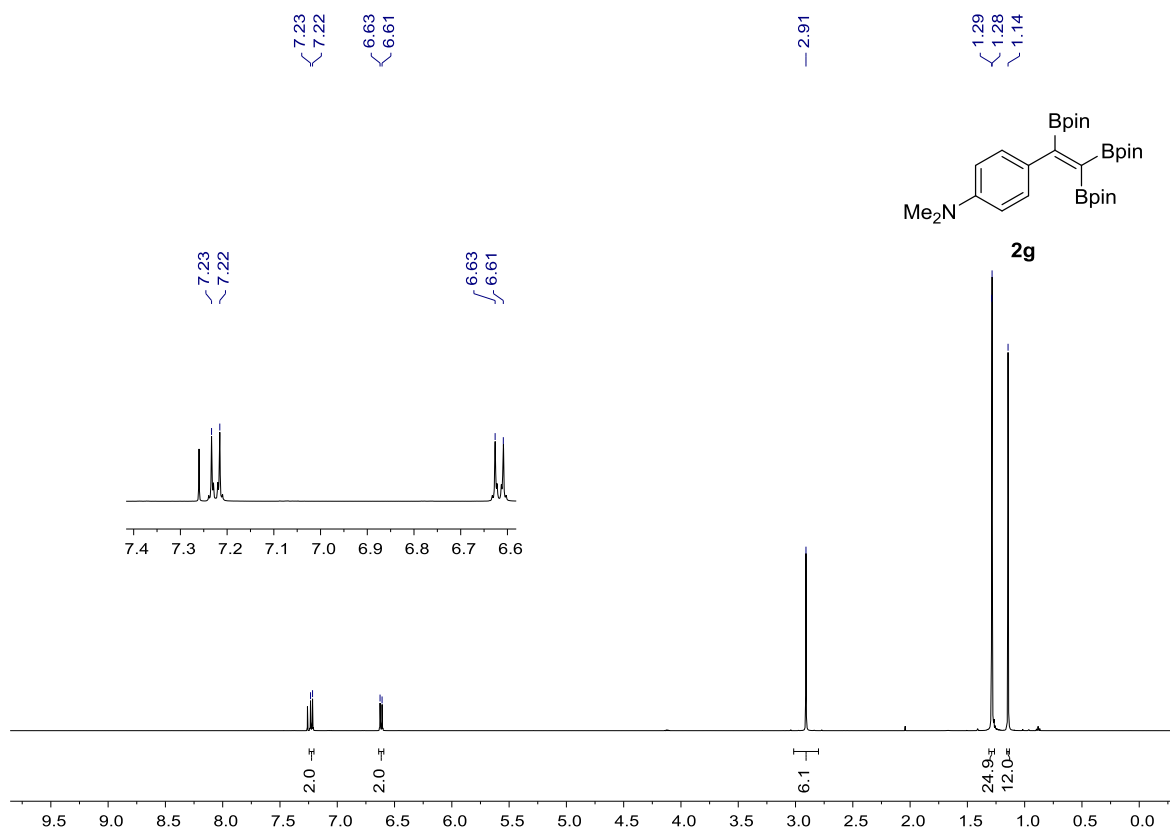

$^{13}\text{C}\{^1\text{H}\}$  NMR spectrum (125 MHz,  $\text{CDCl}_3$ ) of **2g**

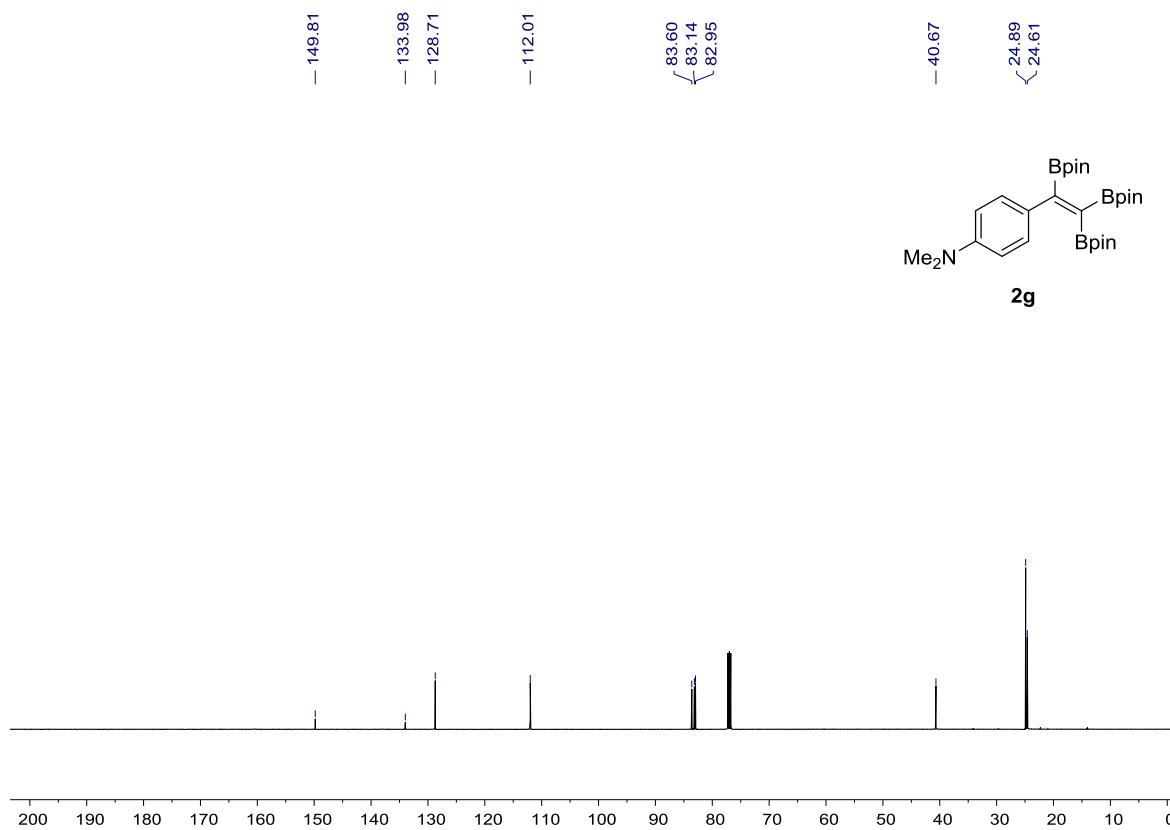

$^{11}\text{B}$  NMR spectrum (160 MHz,  $\text{CDCl}_3$ ) of **2g**

— 30.39

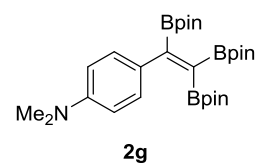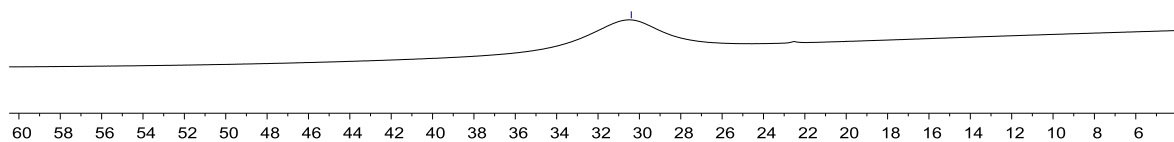

$^1\text{H}$  NMR spectrum (500 MHz,  $\text{CDCl}_3$ ) of **2j**

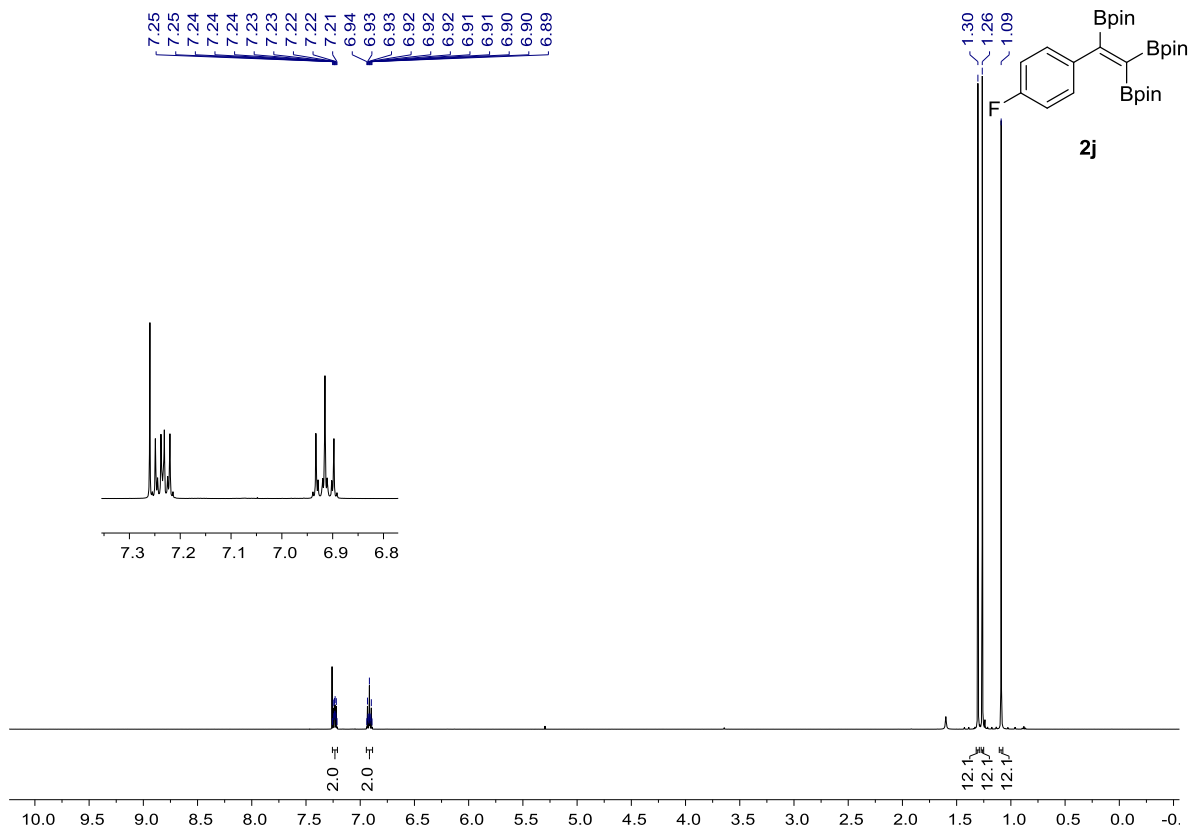

$^{13}\text{C}\{^1\text{H}\}$  NMR spectrum (125 MHz,  $\text{CDCl}_3$ ) of **2j**

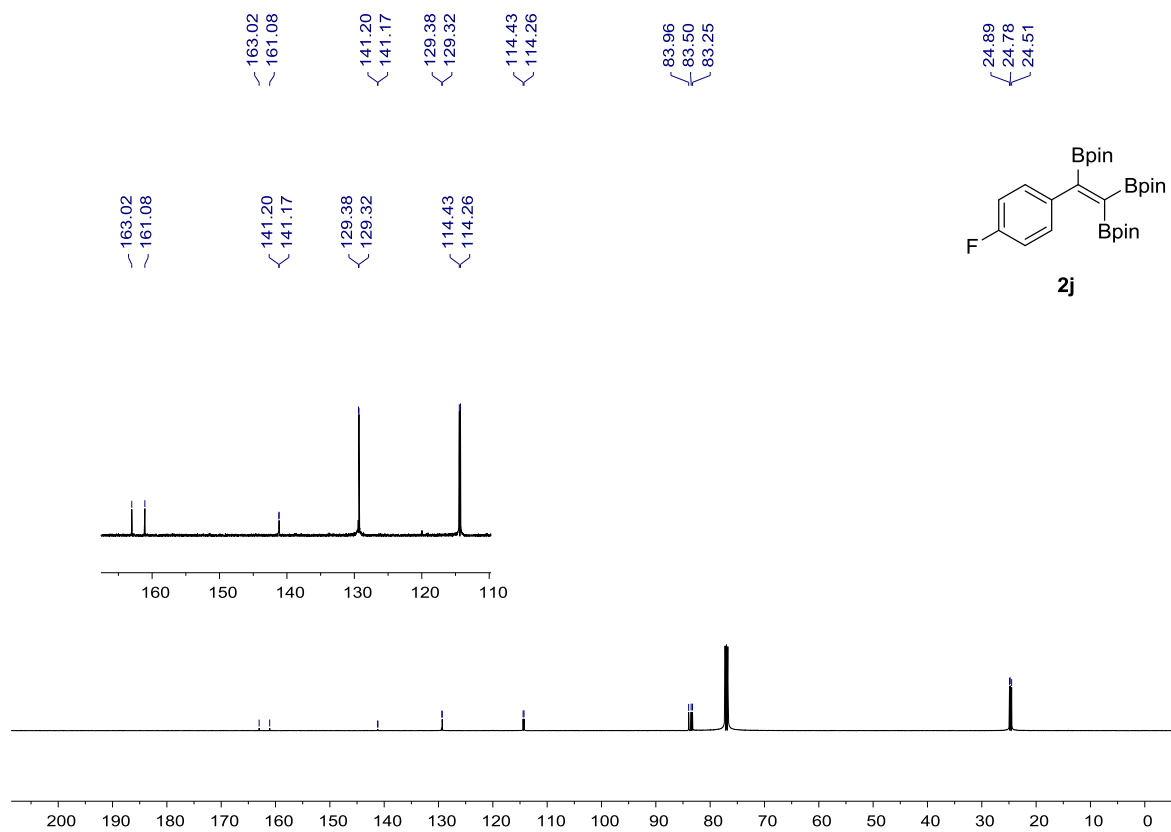

$^{11}\text{B}$  NMR spectrum (160 MHz,  $\text{CDCl}_3$ ) of **2j**

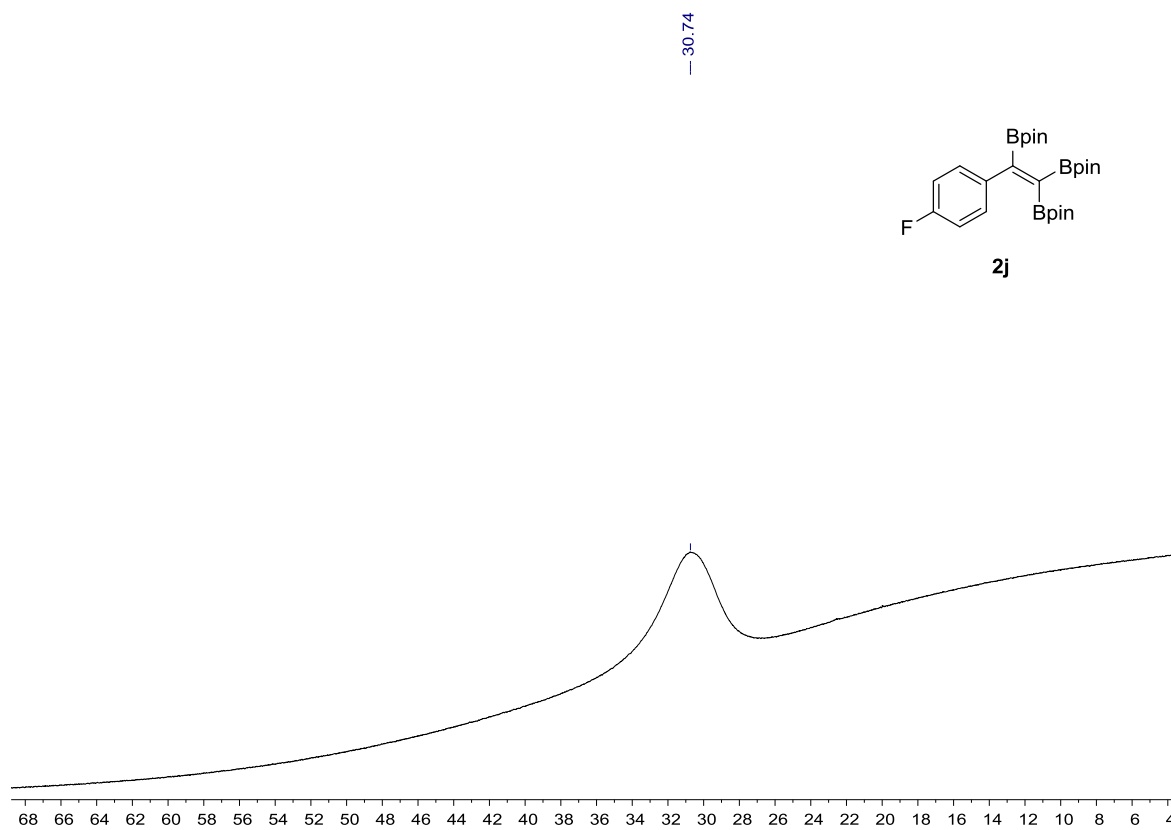

$^{19}\text{F}$  NMR spectrum (470 MHz,  $\text{CDCl}_3$ ) of **2j**

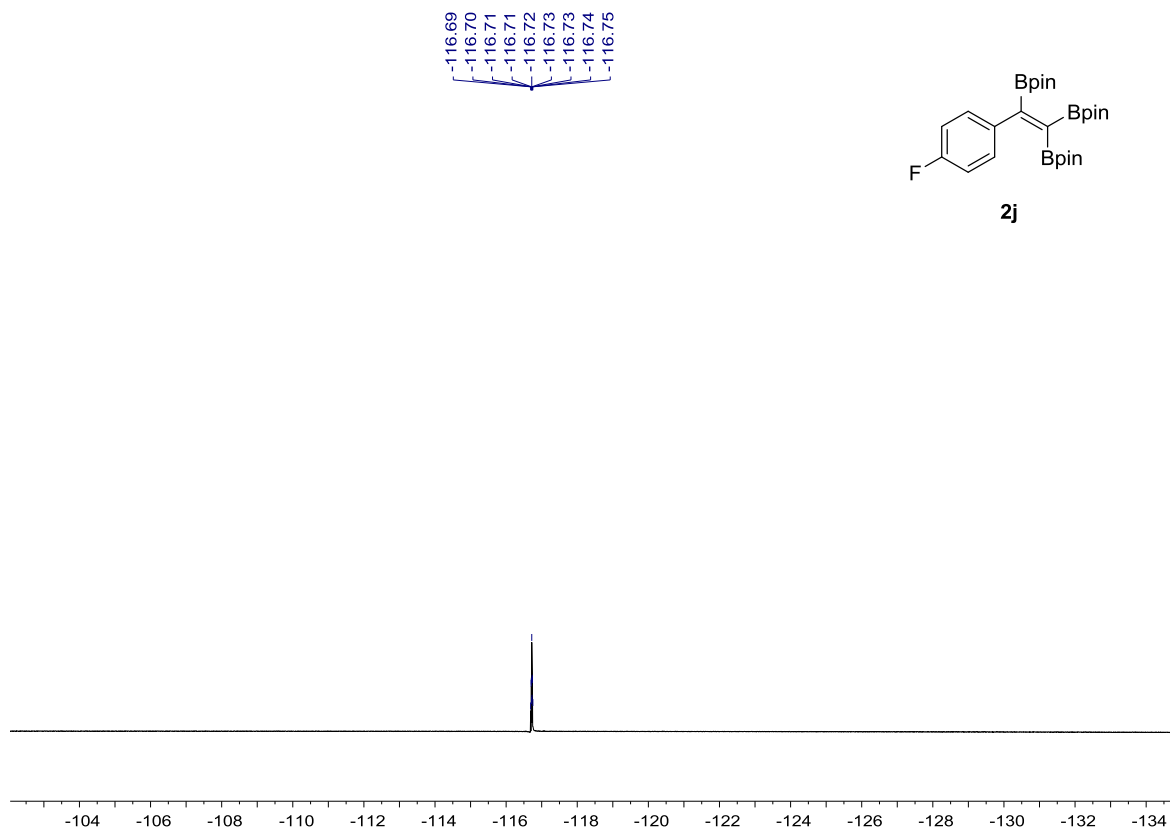

$^1\text{H}$  NMR spectrum (500 MHz,  $\text{CDCl}_3$ ) of **2k**

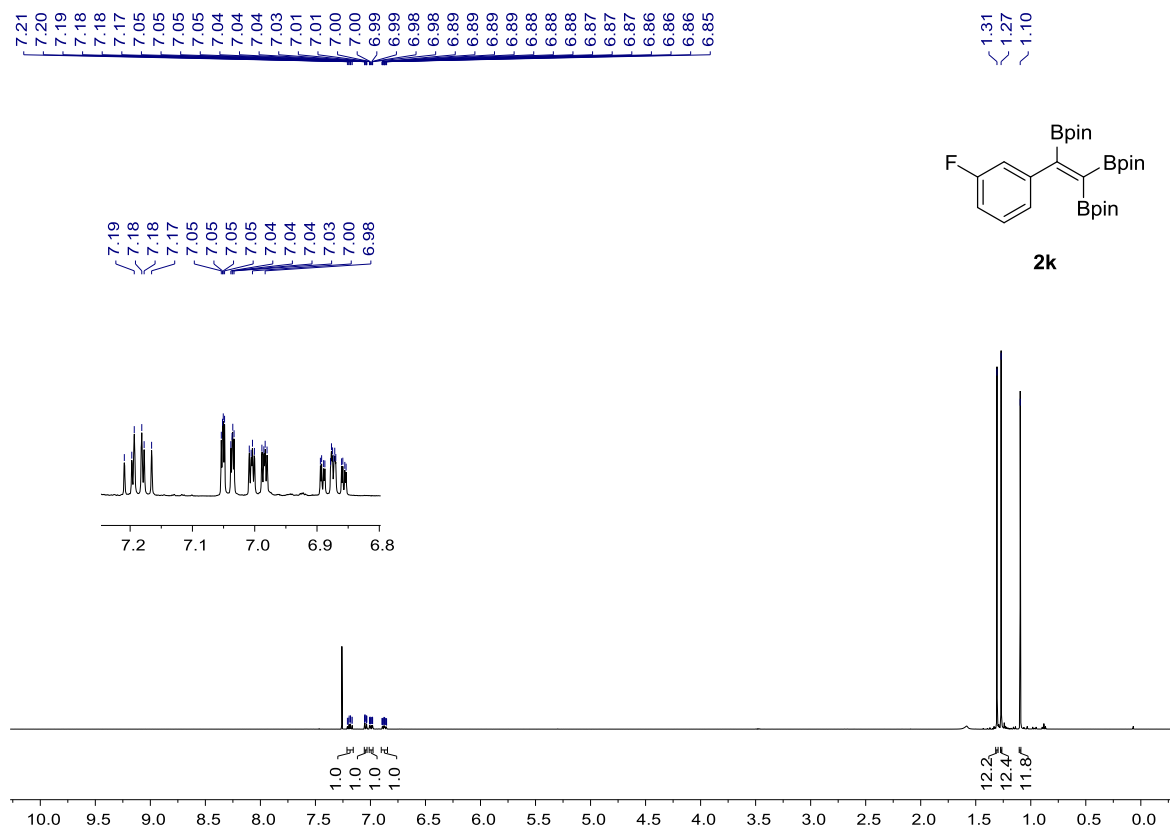

$^{13}\text{C}\{^1\text{H}\}$  NMR spectrum (125 MHz,  $\text{CDCl}_3$ ) of **2k**

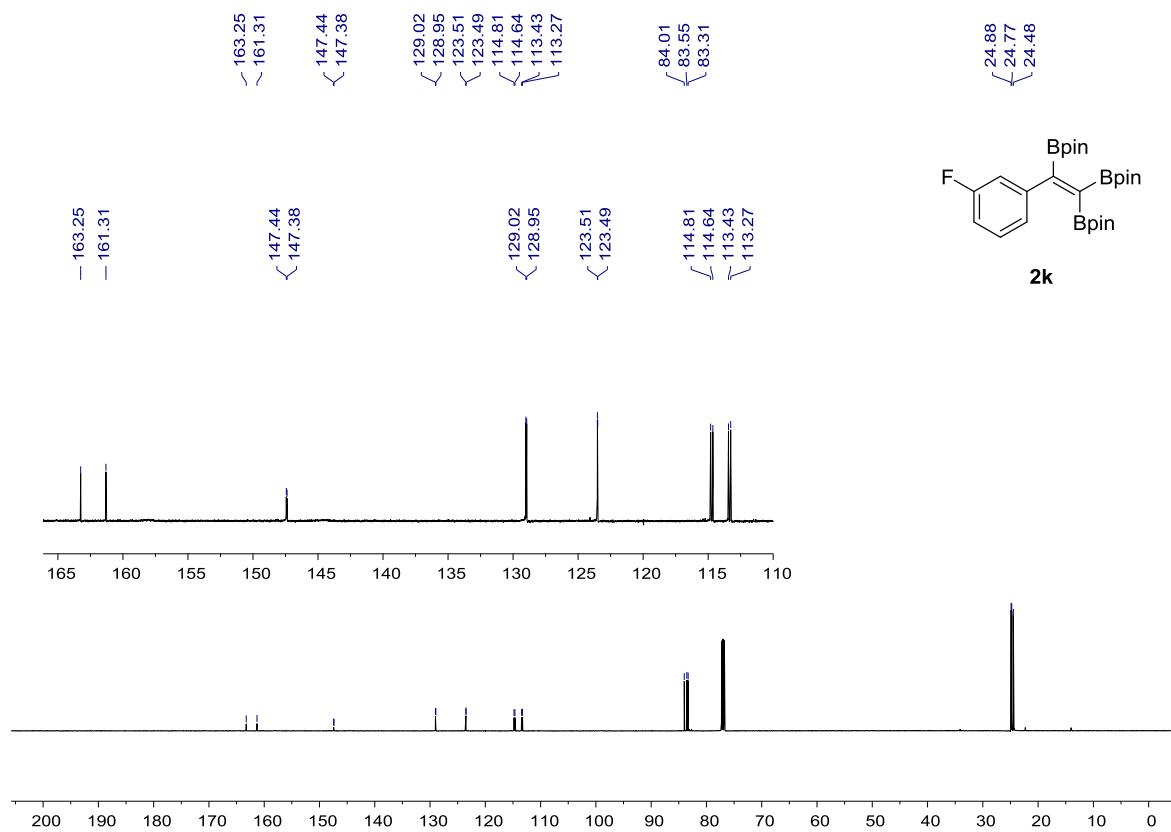

$^{11}\text{B}$  NMR spectrum (160 MHz,  $\text{CDCl}_3$ ) of **2k**

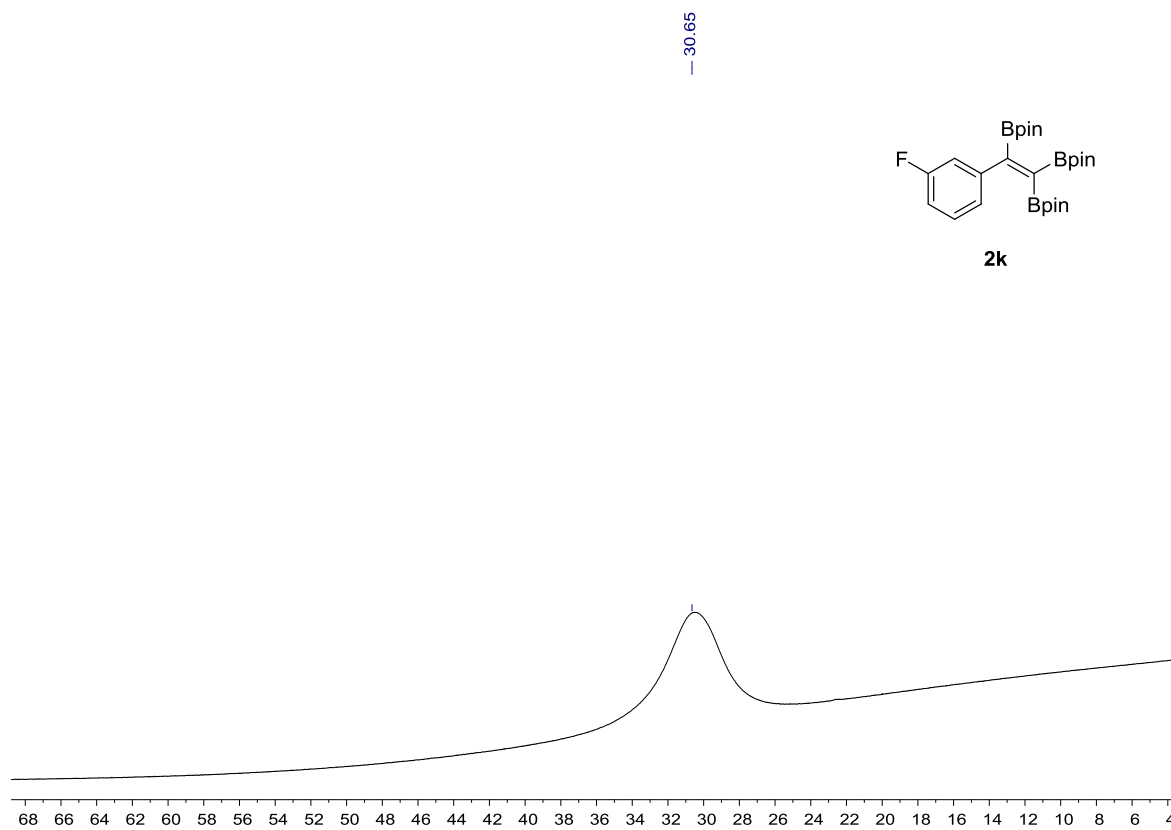

$^{19}\text{F}$  NMR spectrum (470 MHz,  $\text{CDCl}_3$ ) of **2k**

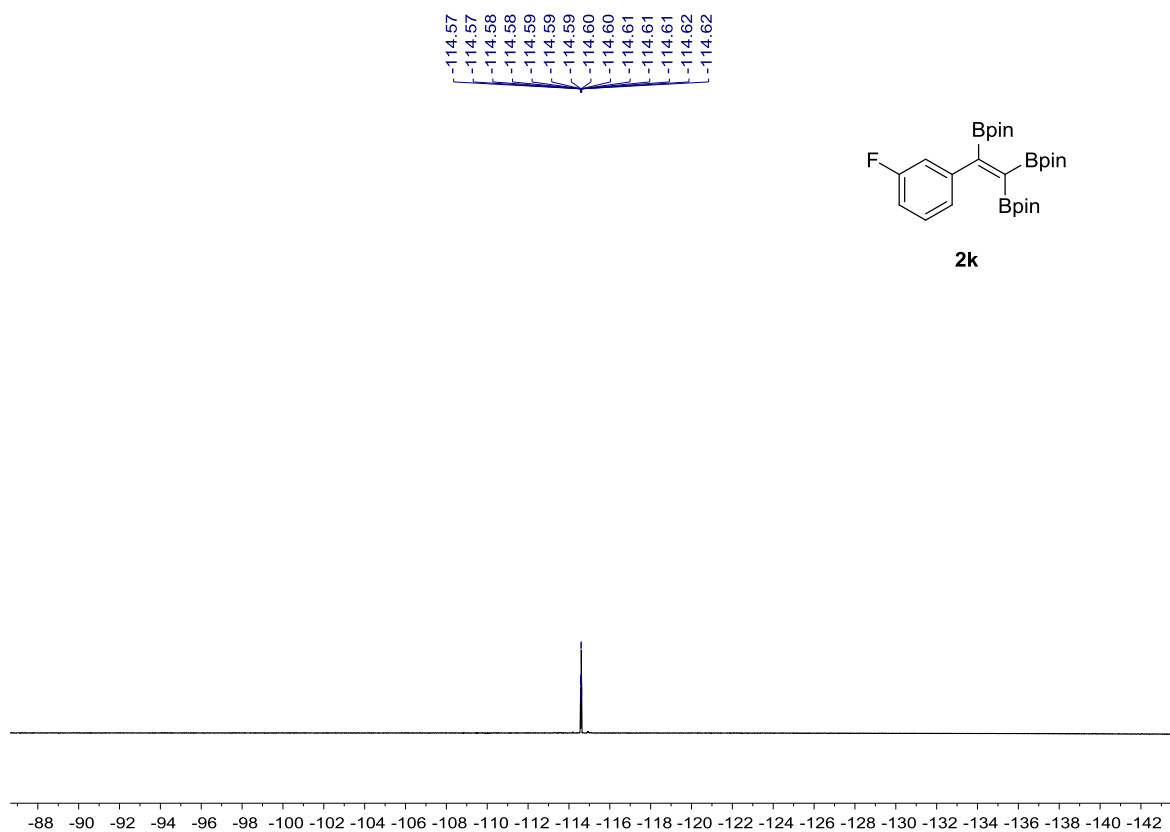

$^1\text{H}$  NMR spectrum (500 MHz,  $\text{CDCl}_3$ ) of **2l**

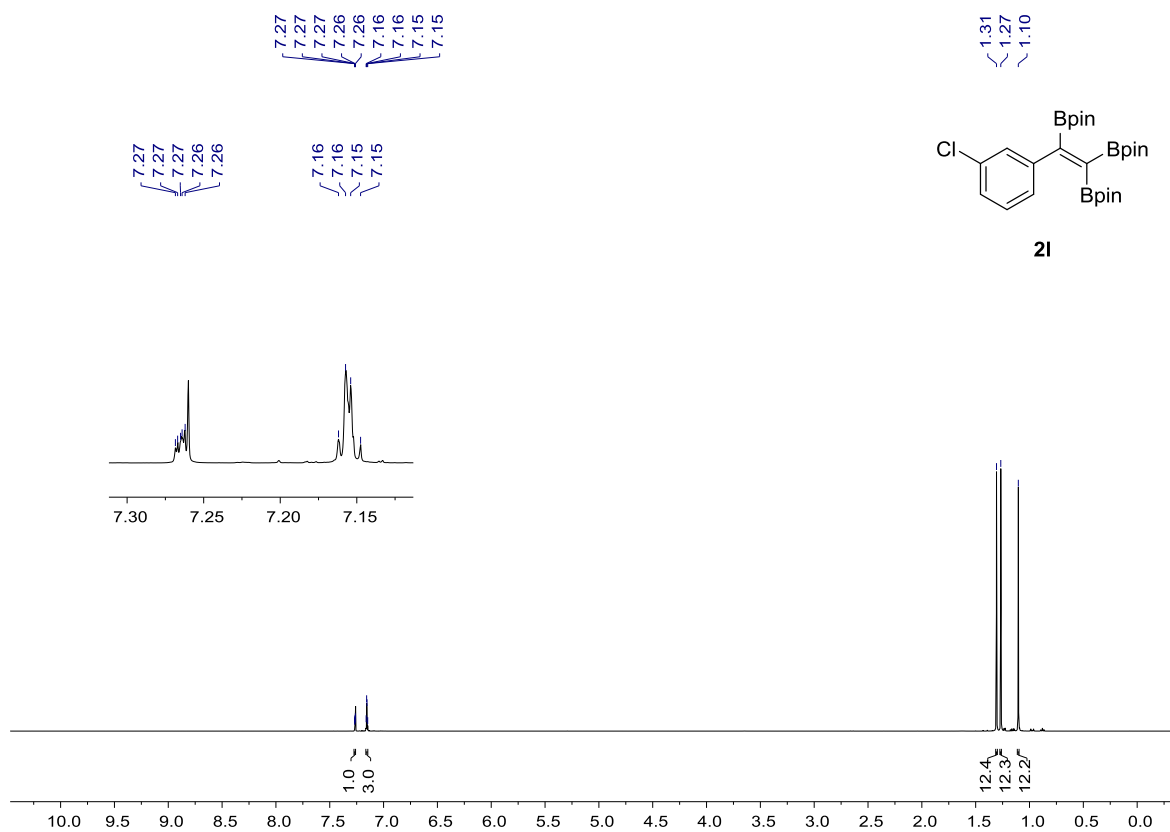

$^{13}\text{C}\{^1\text{H}\}$  NMR spectrum (125 MHz,  $\text{CDCl}_3$ ) of **2I**

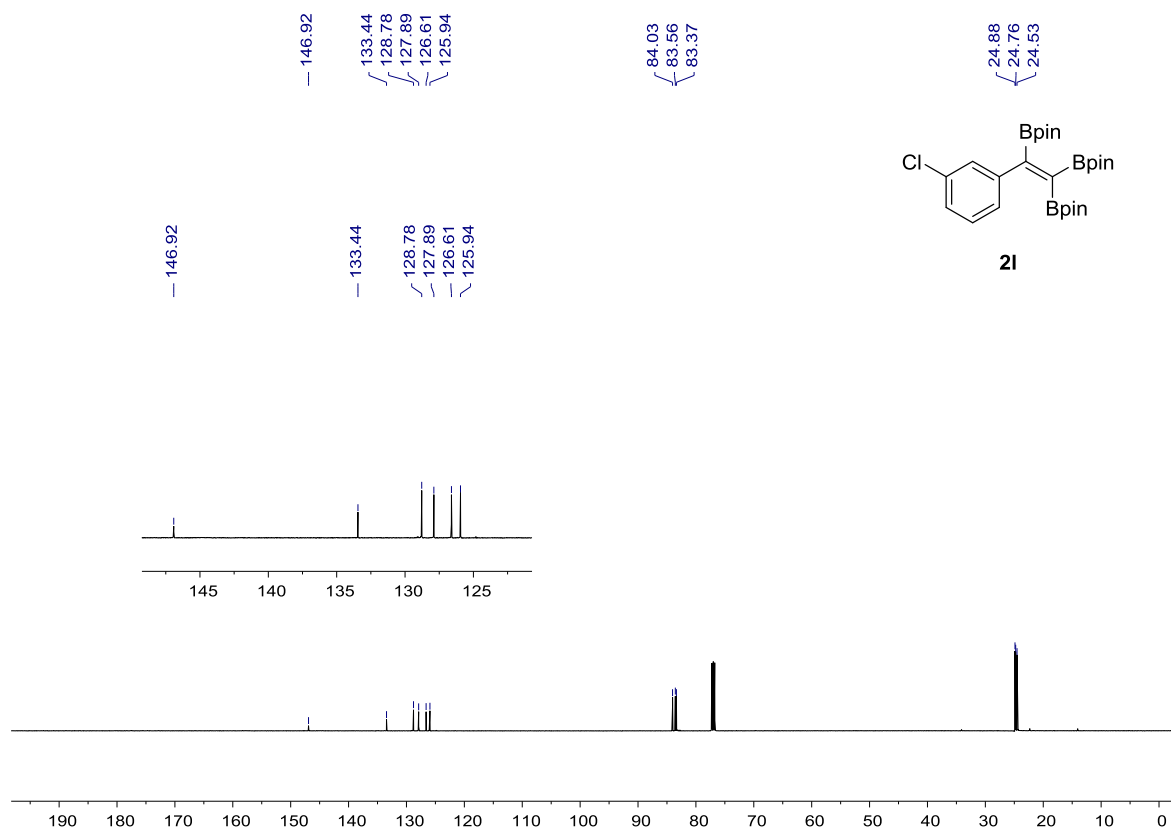

$^{11}\text{B}$  NMR spectrum (160 MHz,  $\text{CDCl}_3$ ) of **2I**

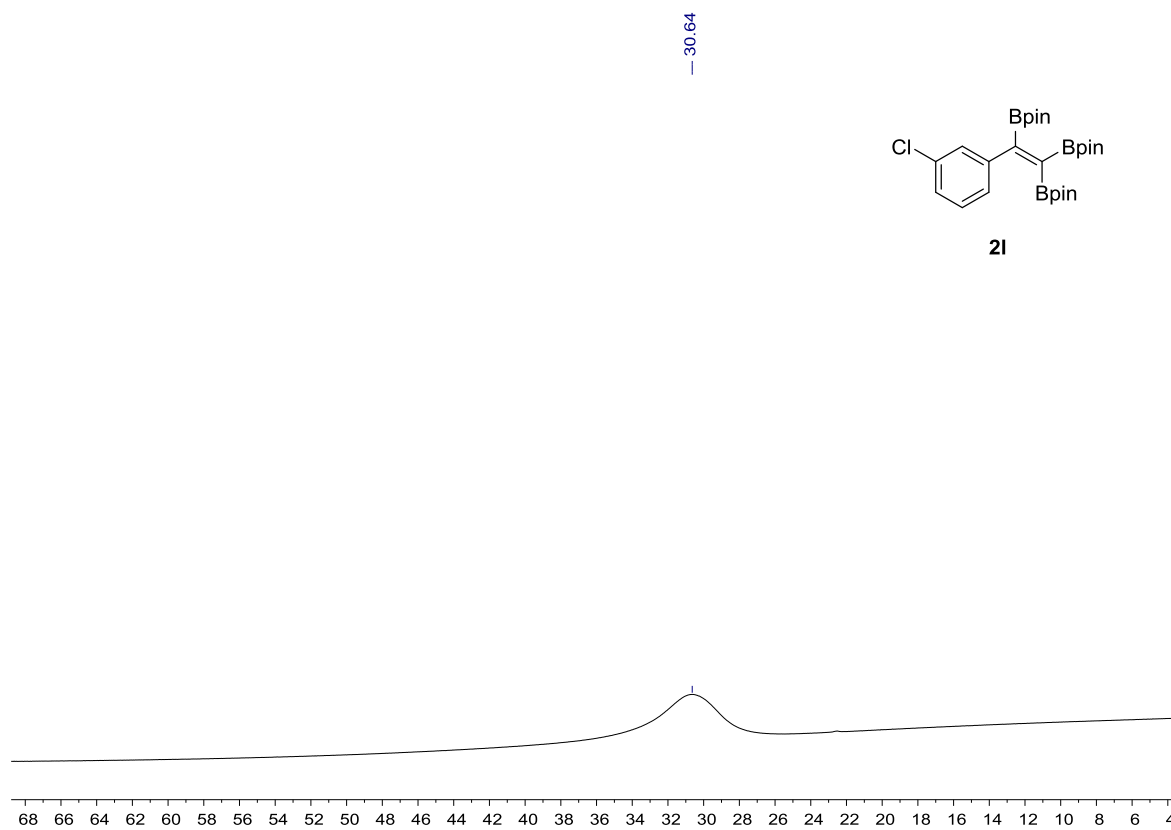



$^1\text{H}$  NMR spectrum (500 MHz,  $\text{CDCl}_3$ ) of **2m**

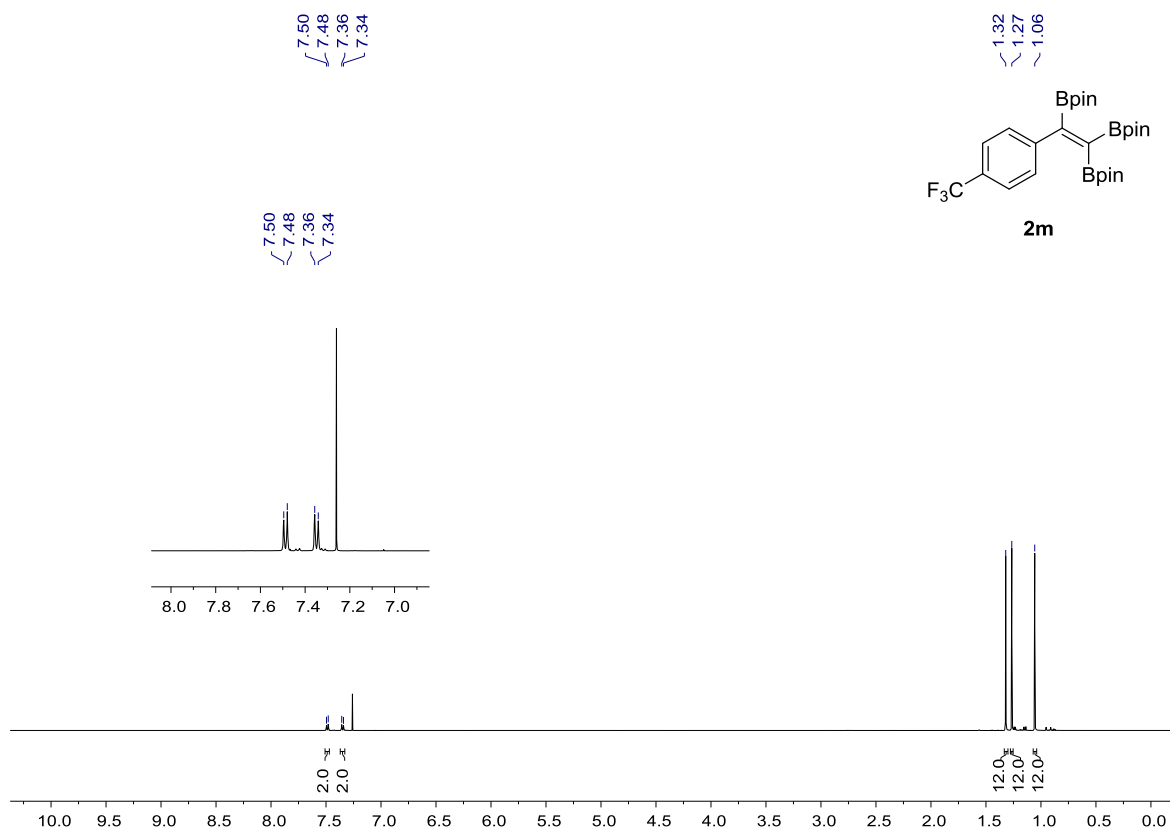

$^{13}\text{C}\{^1\text{H}\}$  NMR spectrum (125 MHz,  $\text{CDCl}_3$ ) of **2m**

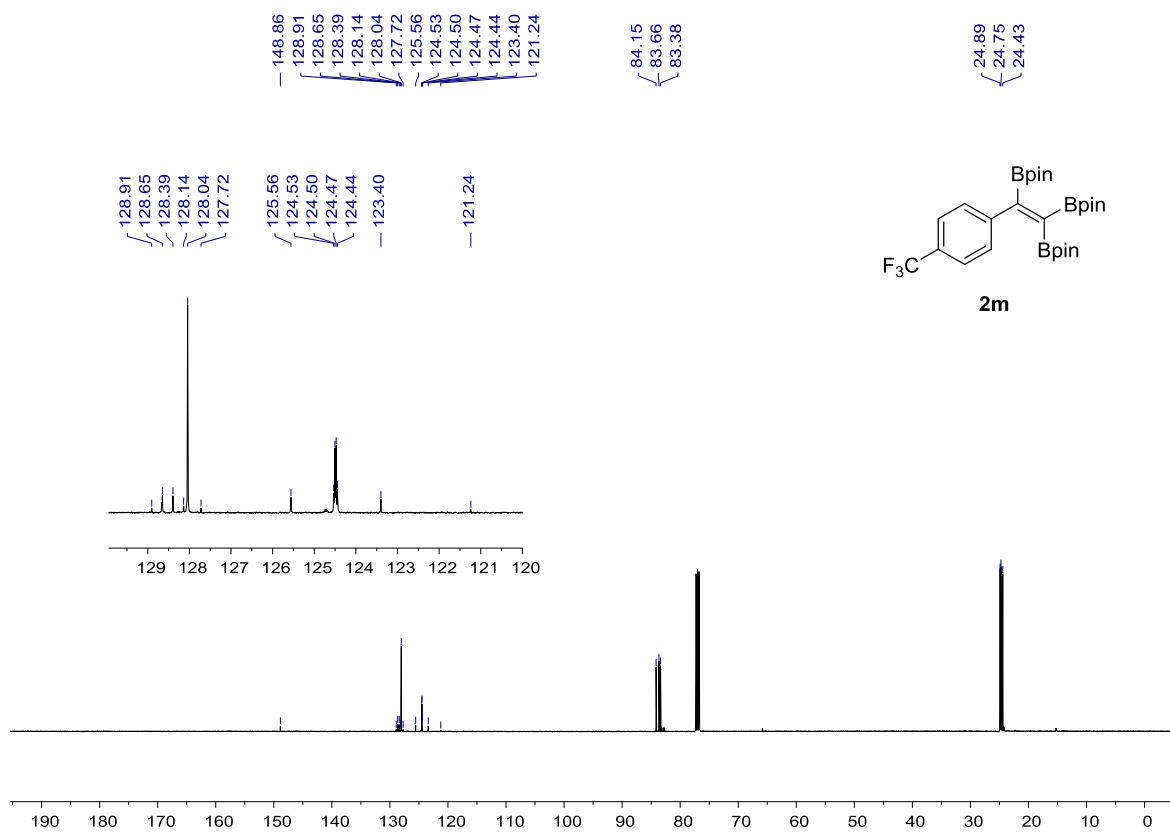

$^{11}\text{B}$  NMR spectrum (160 MHz,  $\text{CDCl}_3$ ) of **2m**

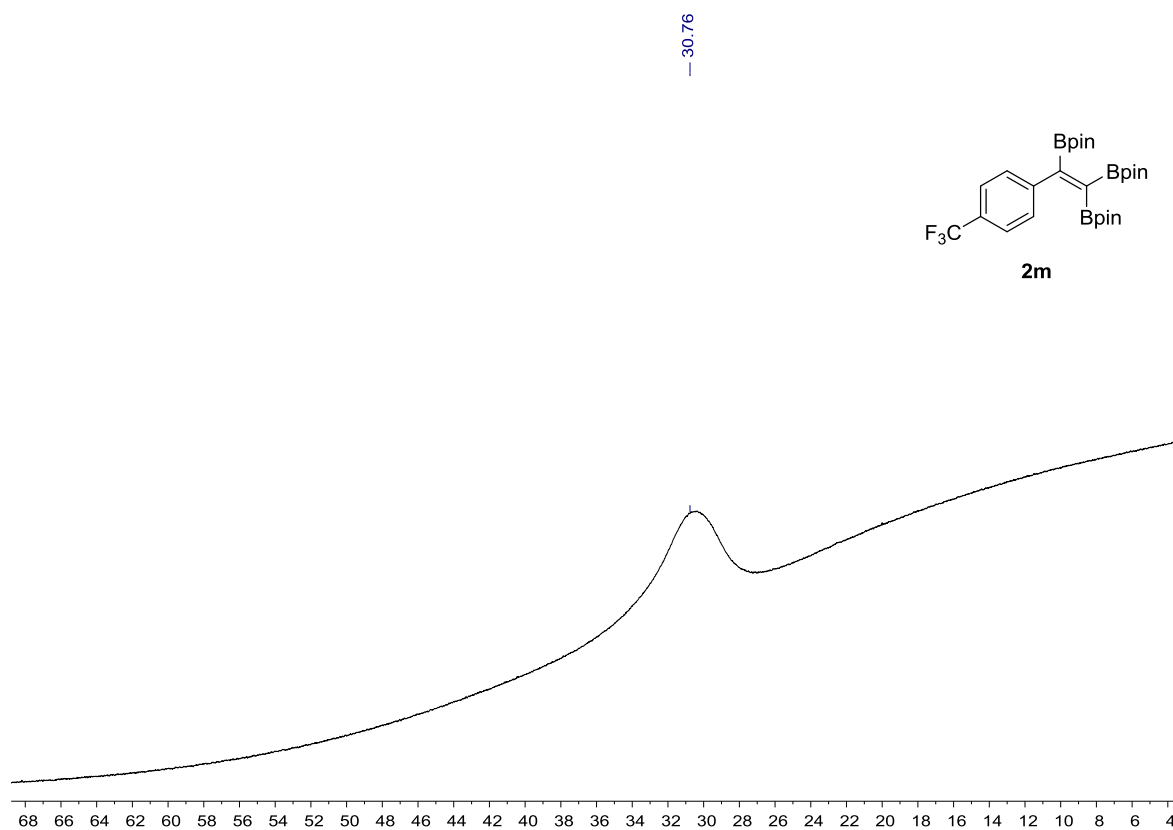

$^{19}\text{F}$  NMR spectrum (470 MHz,  $\text{CDCl}_3$ ) of **2m**

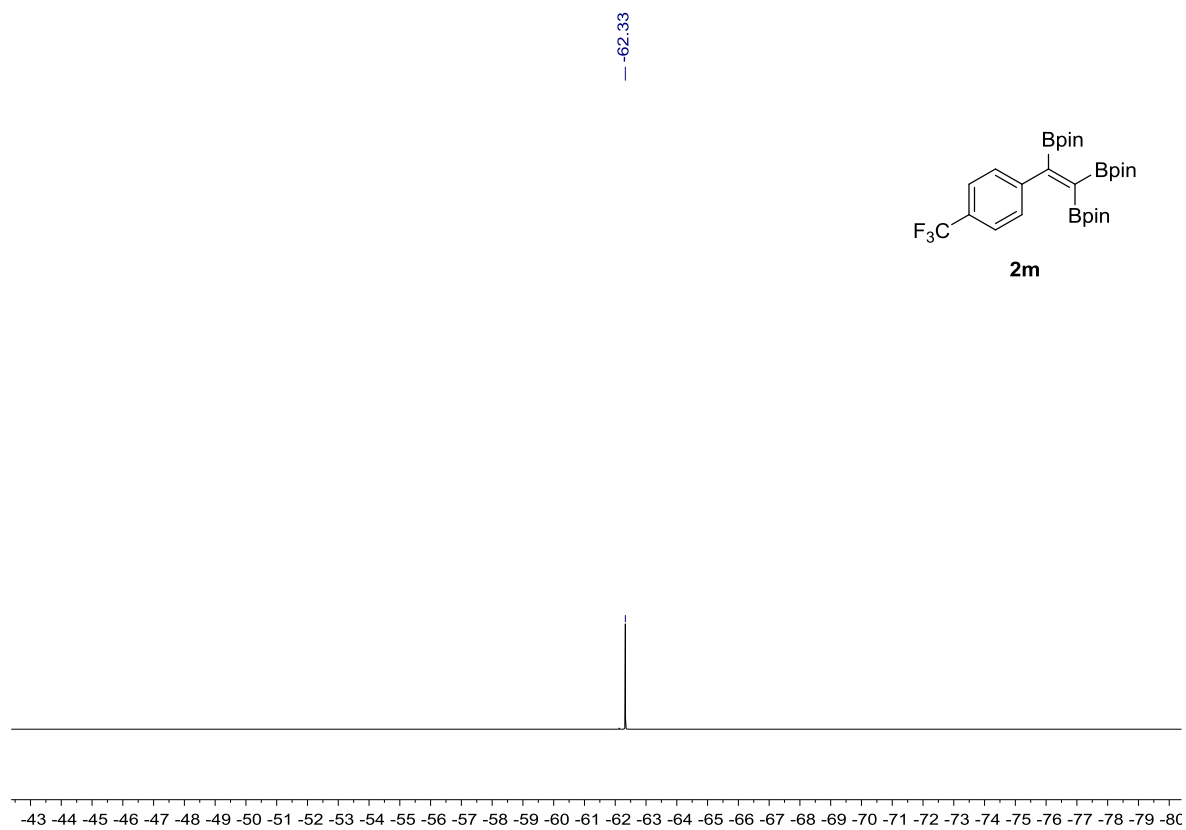

<sup>1</sup>H NMR spectrum (500 MHz, CDCl<sub>3</sub>) of **2n**

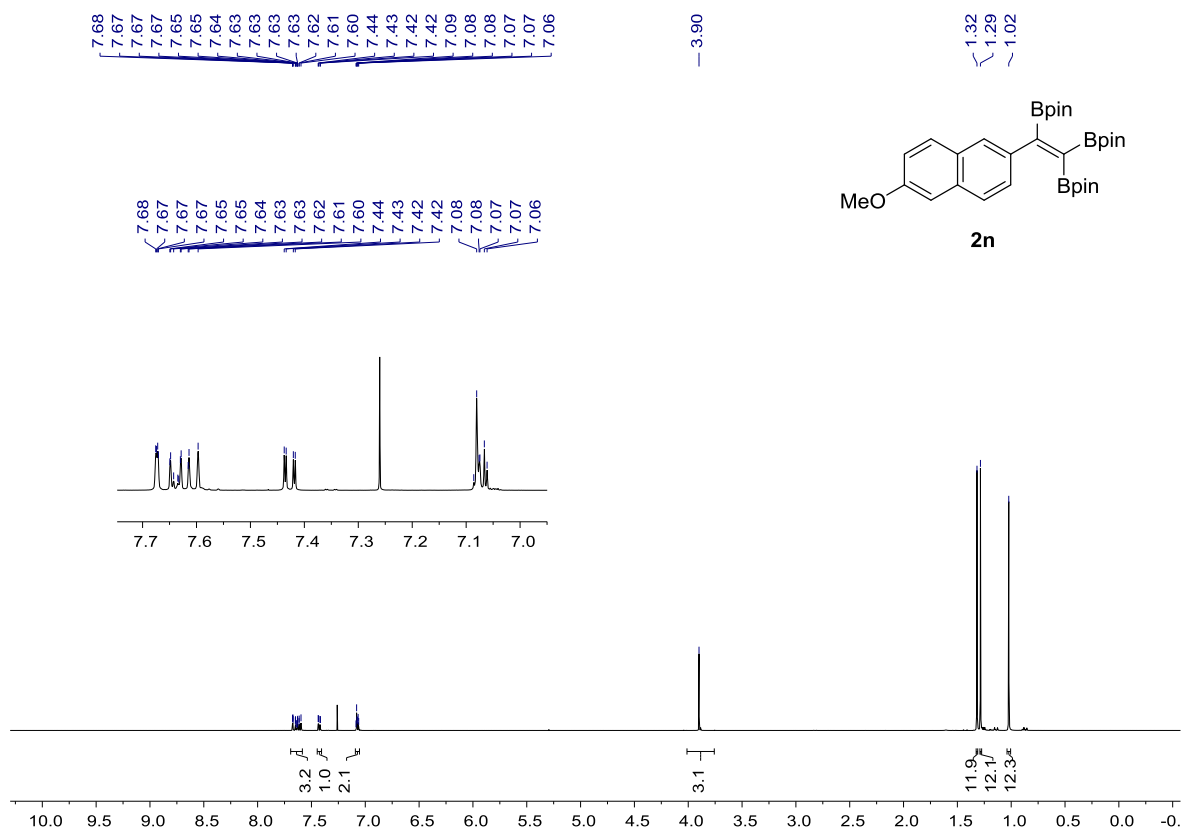

<sup>13</sup>C{<sup>1</sup>H} NMR spectrum (125 MHz, CDCl<sub>3</sub>) of **2n**

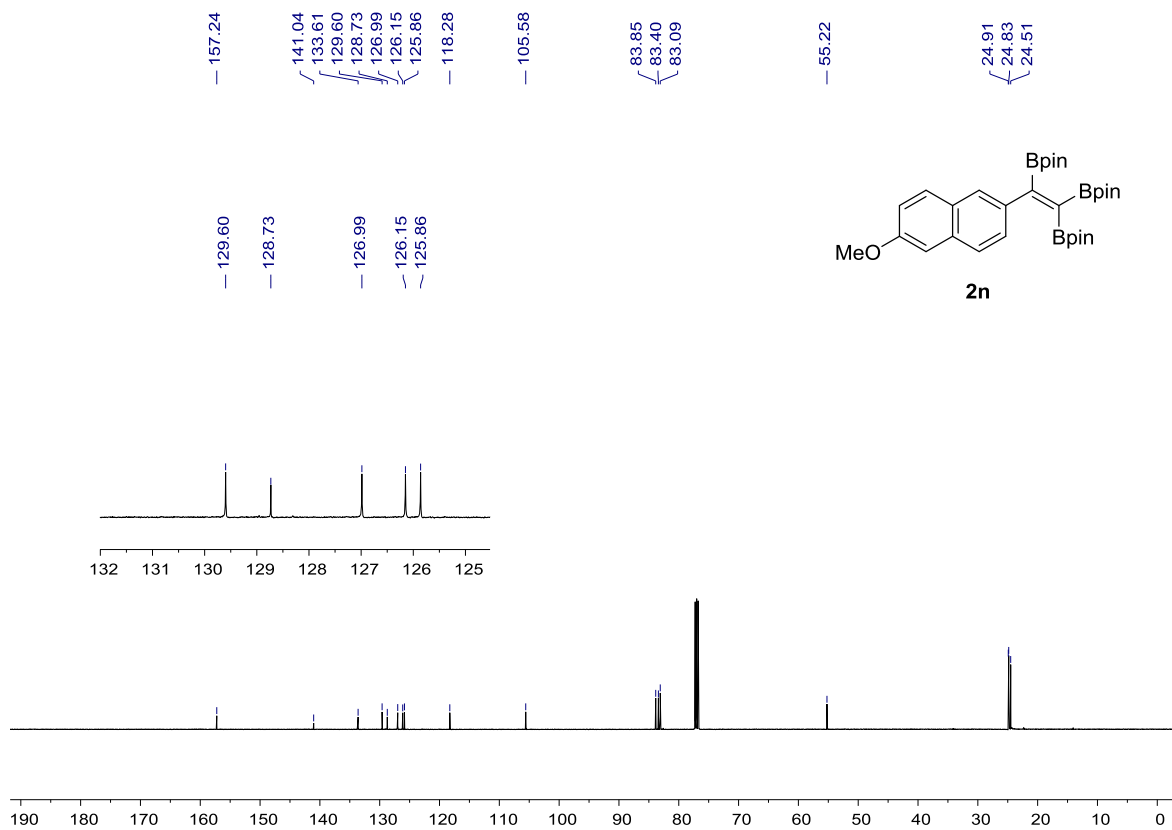



$^{13}\text{C}\{^1\text{H}\}$  NMR spectrum (125 MHz,  $\text{CDCl}_3$ ) of **2o**

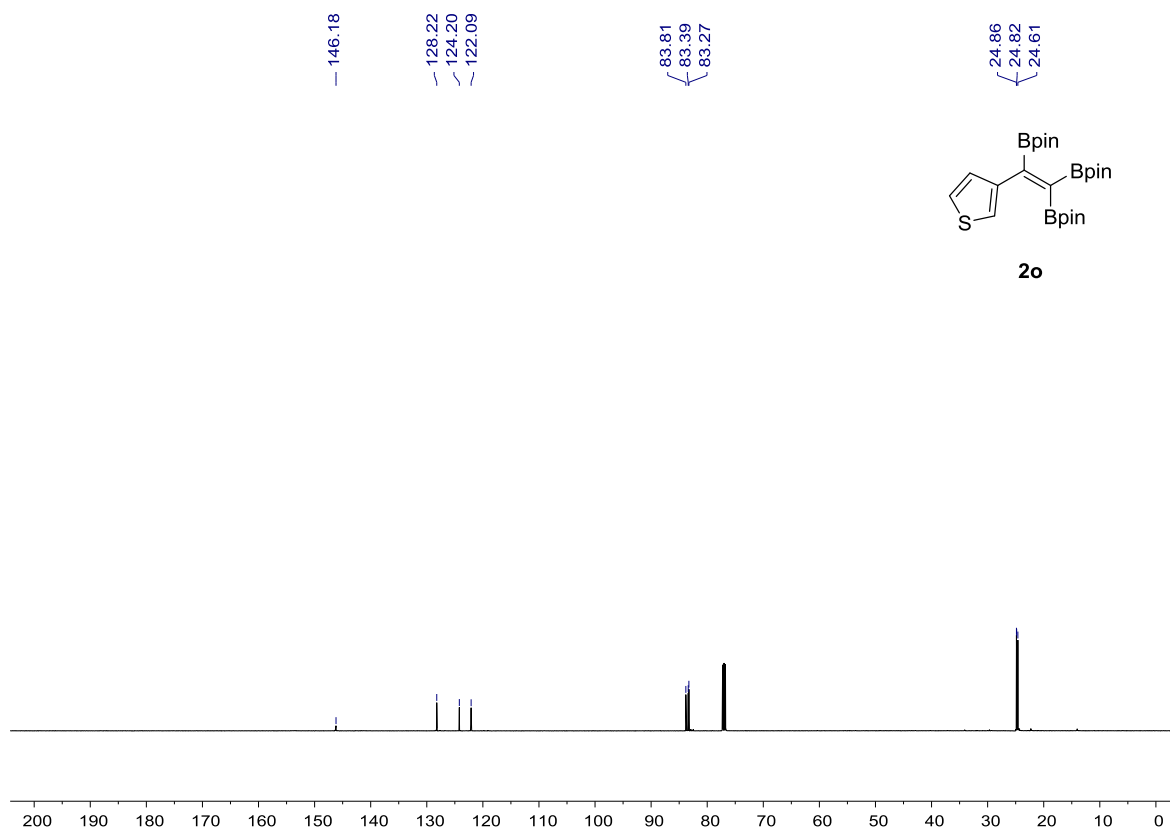

$^{11}\text{B}$  NMR spectrum (160 MHz,  $\text{CDCl}_3$ ) of **2o**

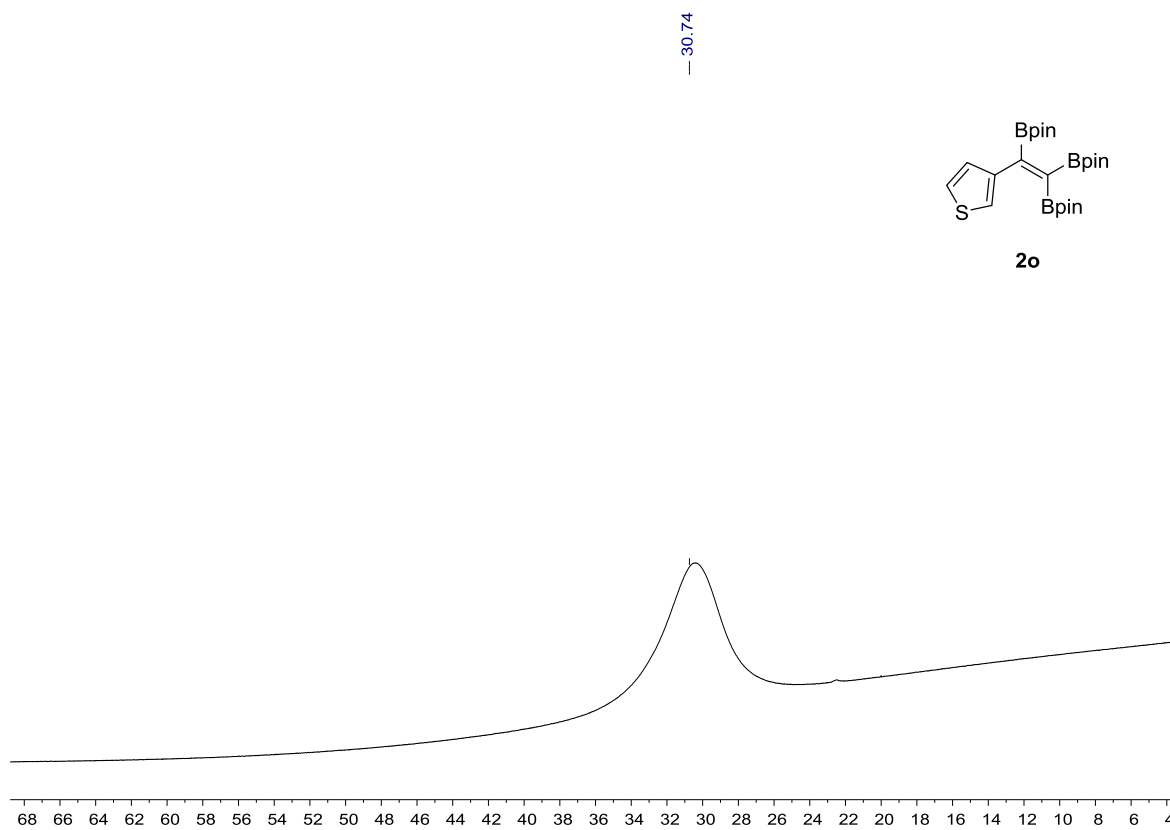

<sup>1</sup>H NMR spectrum (500 MHz, CDCl<sub>3</sub>) of **2p**

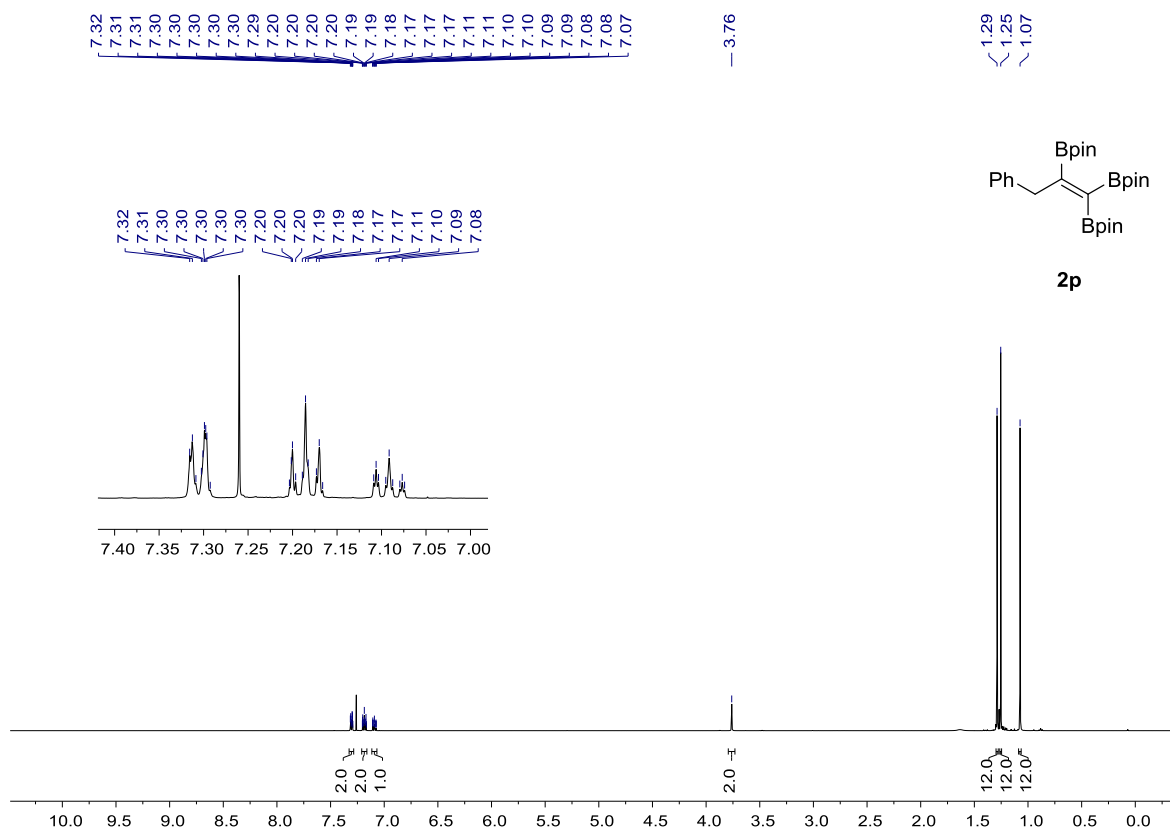

<sup>13</sup>C{<sup>1</sup>H} NMR spectrum (125 MHz, CDCl<sub>3</sub>) of **2p**

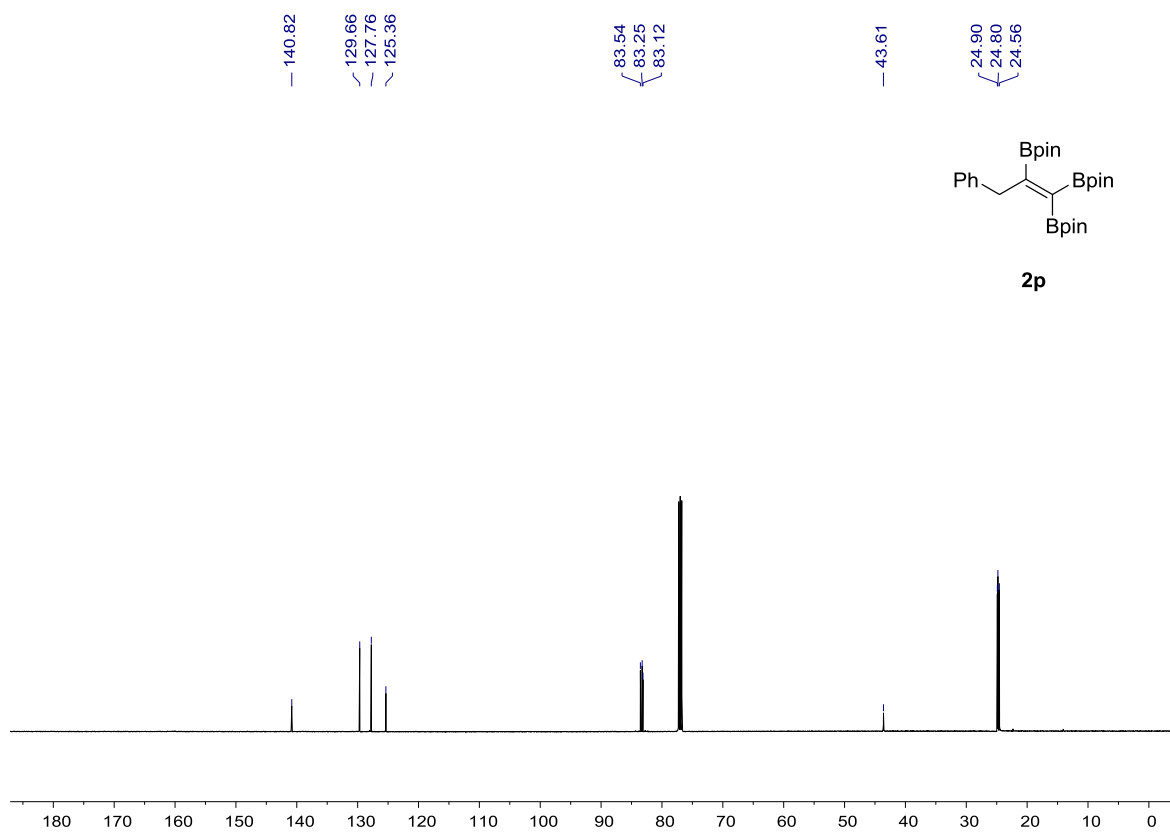

$^{11}\text{B}$  NMR spectrum (160 MHz,  $\text{CDCl}_3$ ) of **2p**

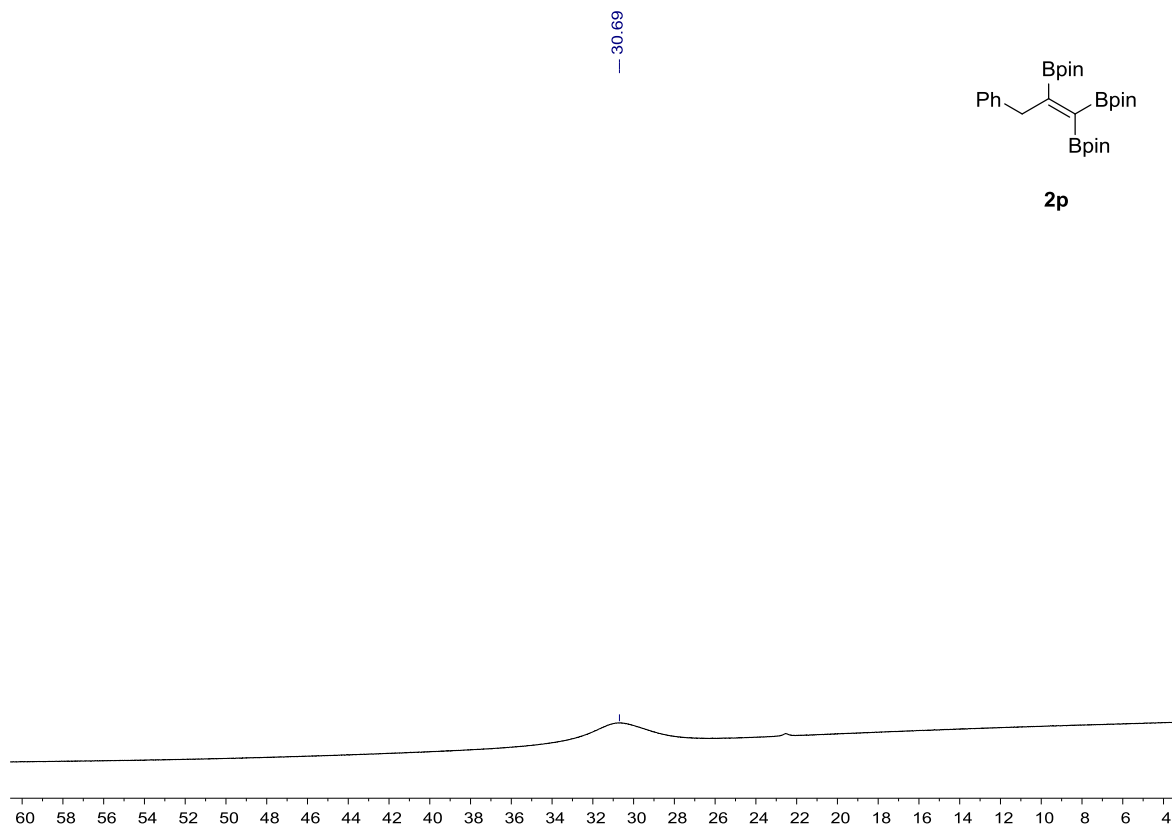

$^1\text{H}$  NMR spectrum (500 MHz,  $\text{CDCl}_3$ ) of **2q**

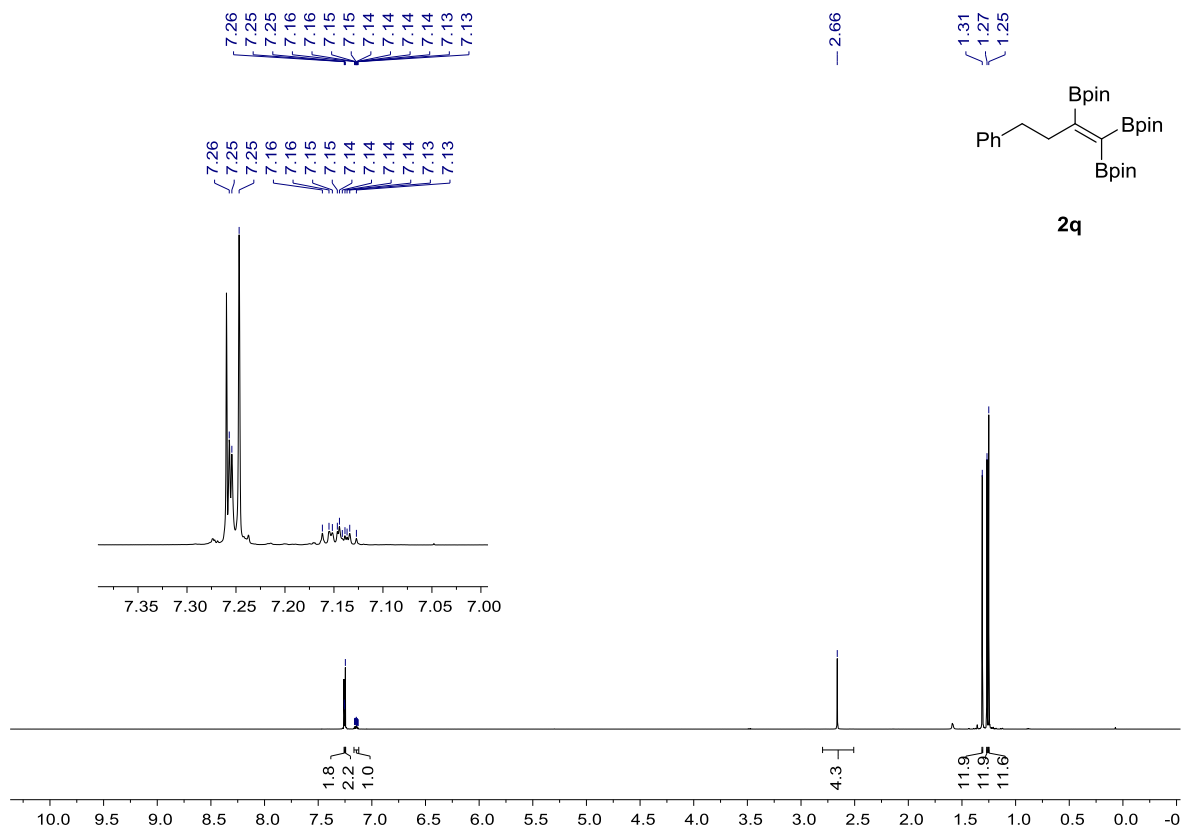

$^{13}\text{C}\{^1\text{H}\}$  NMR spectrum (125 MHz,  $\text{CDCl}_3$ ) of **2q**

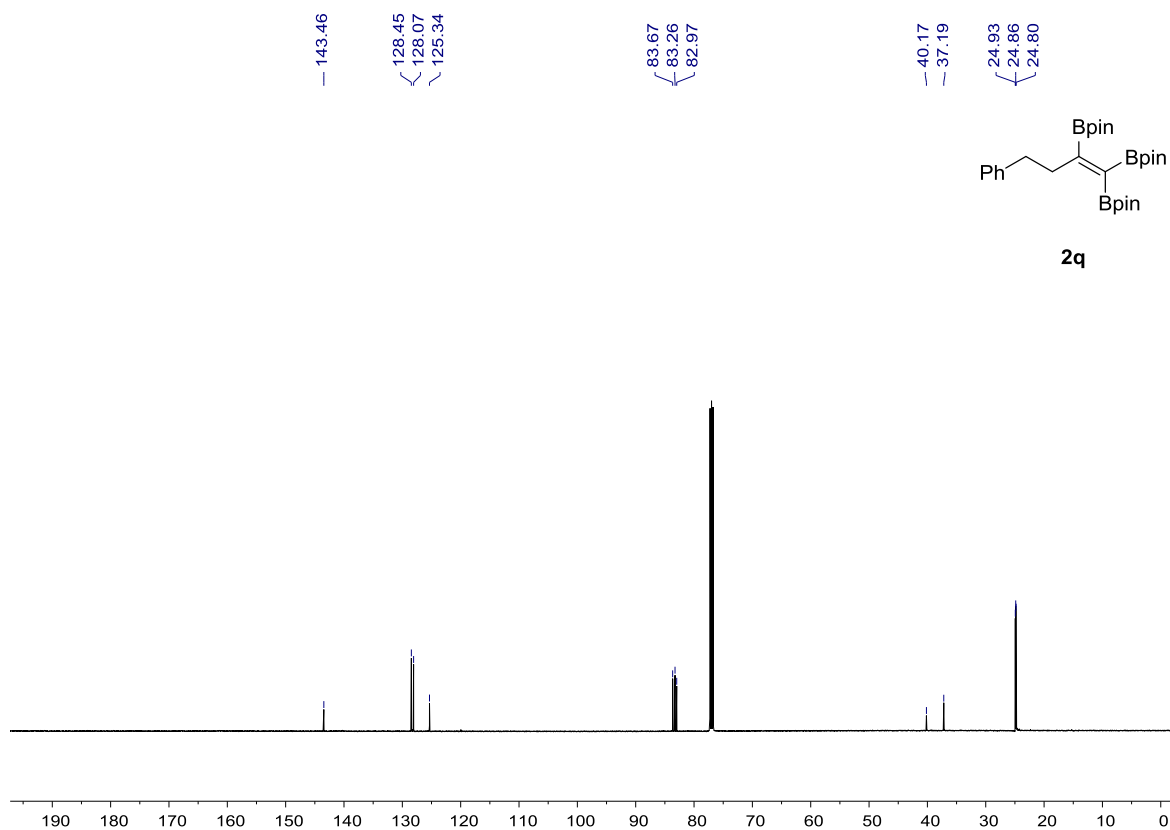

$^{11}\text{B}$  NMR spectrum (160 MHz,  $\text{CDCl}_3$ ) of **2q**

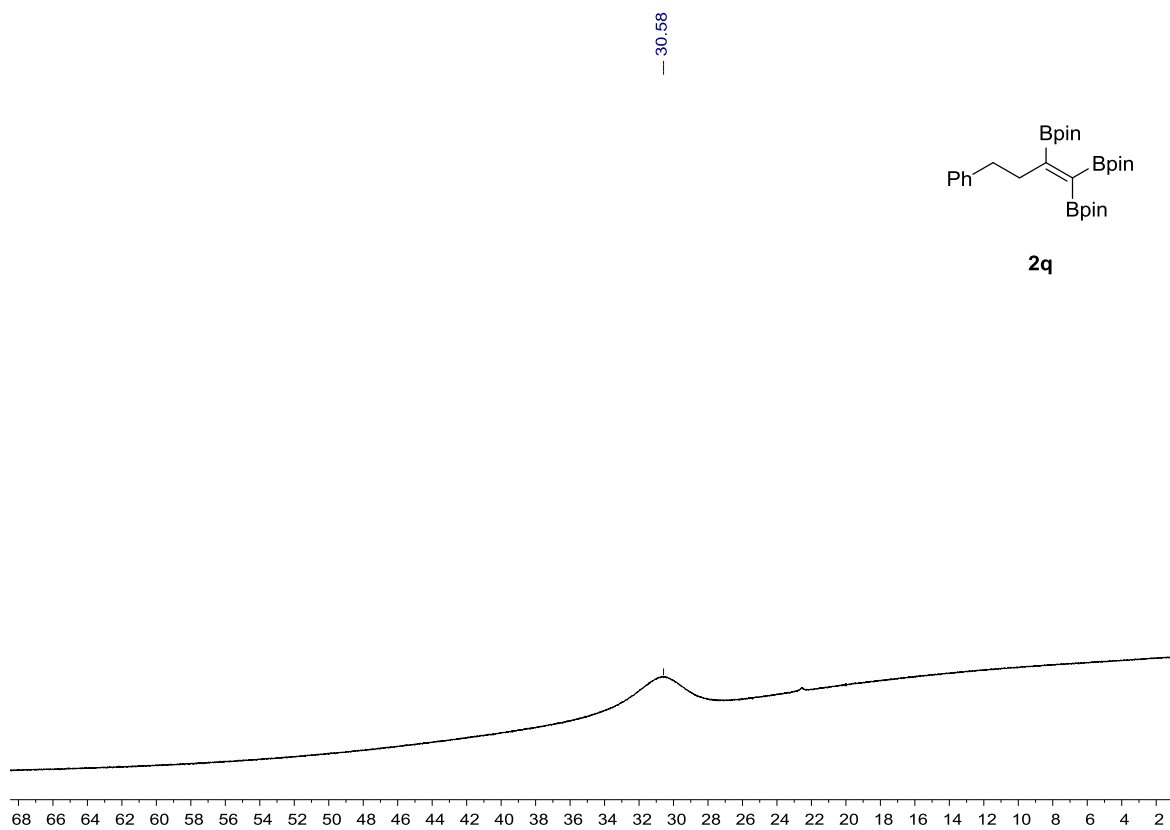



$^1\text{H}$  NMR spectrum (500 MHz,  $\text{CDCl}_3$ ) of **2r**

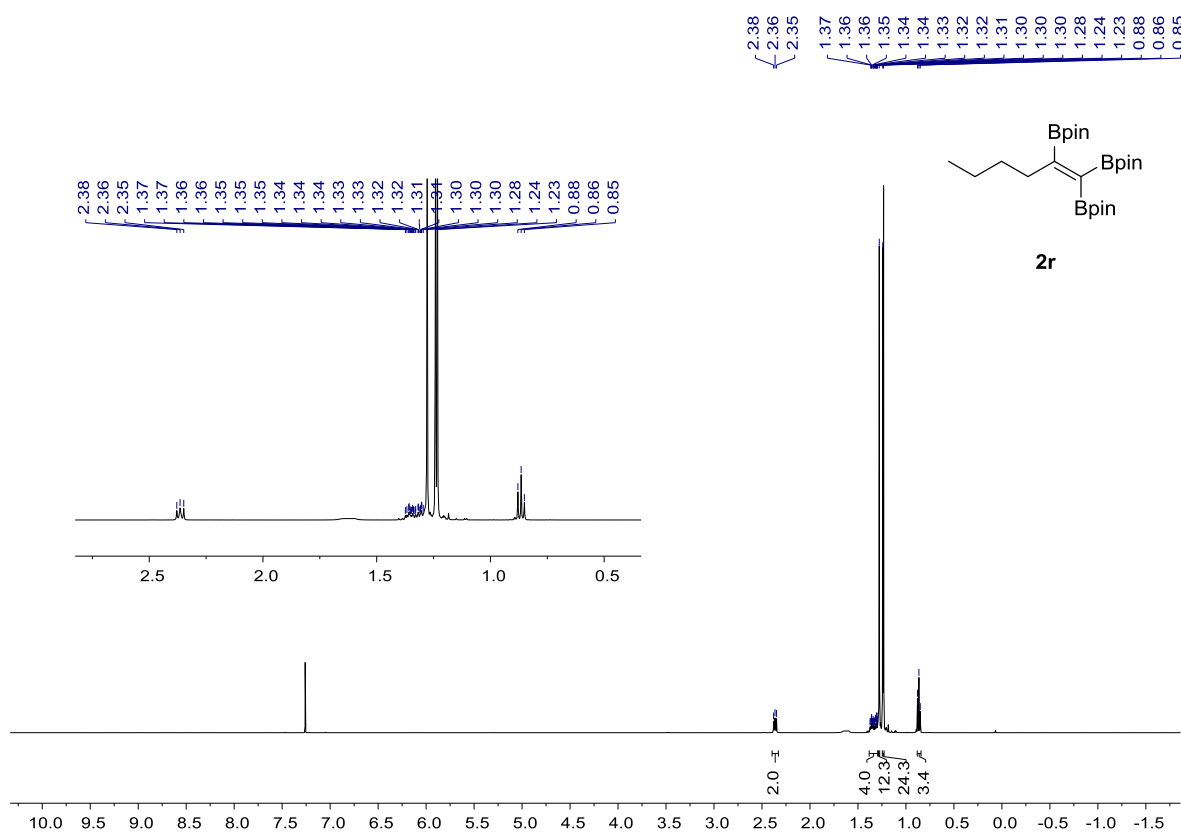

$^{13}\text{C}\{^1\text{H}\}$  NMR spectrum (125 MHz,  $\text{CDCl}_3$ ) of **2r**

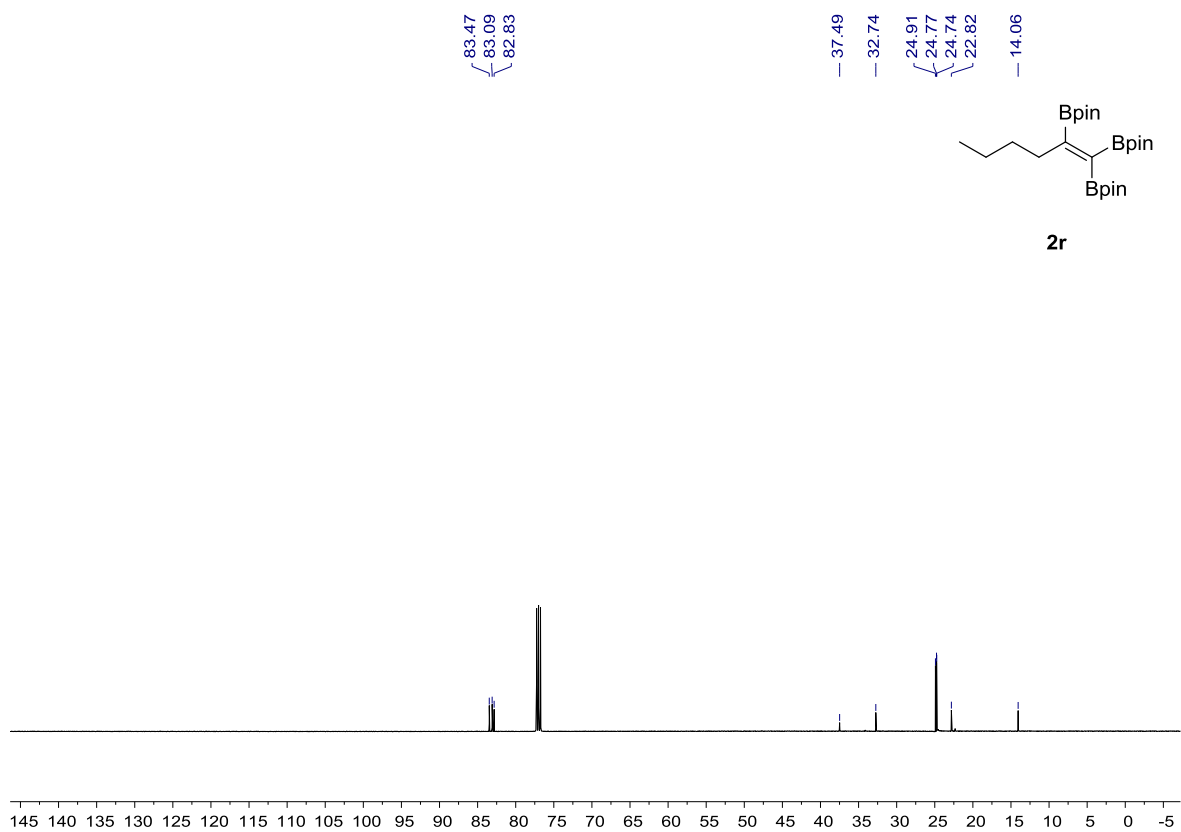



$^{13}\text{C}\{^1\text{H}\}$  NMR spectrum (125 MHz,  $\text{CDCl}_3$ ) of **2s**

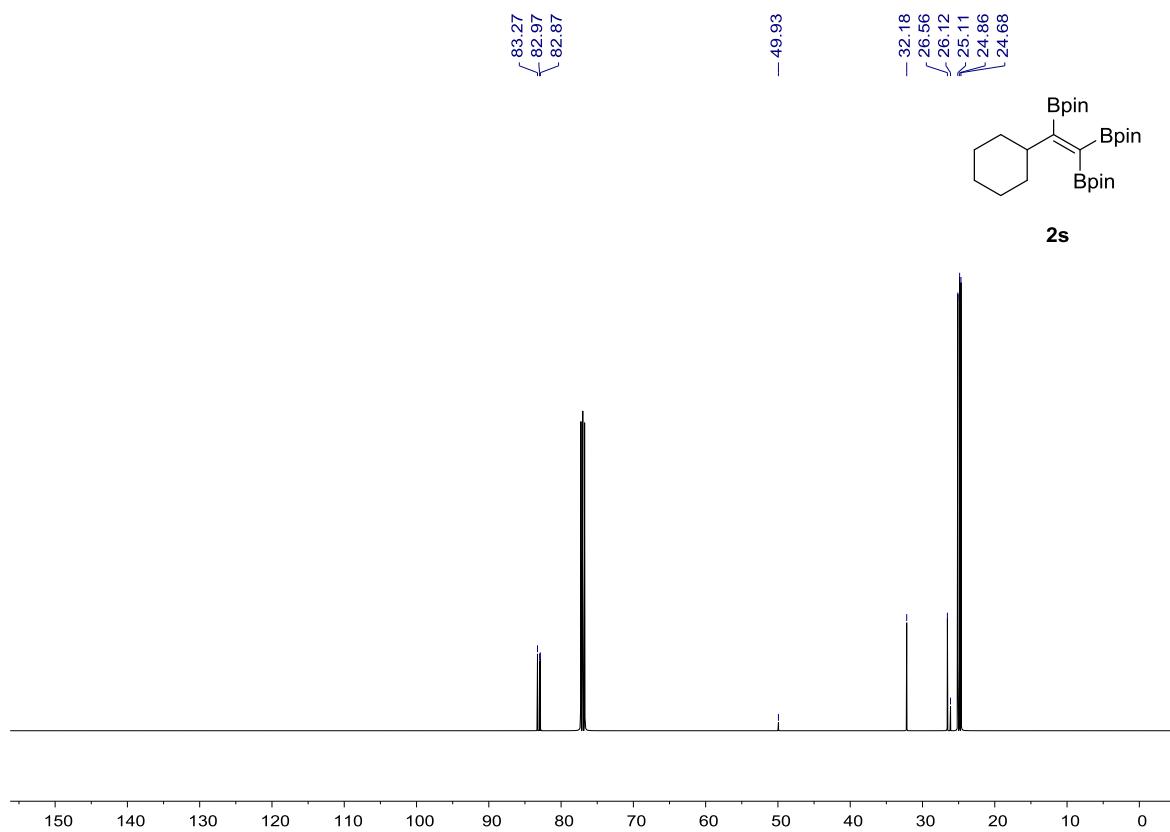

$^{11}\text{B}$  NMR spectrum (160 MHz,  $\text{CDCl}_3$ ) of **2s**

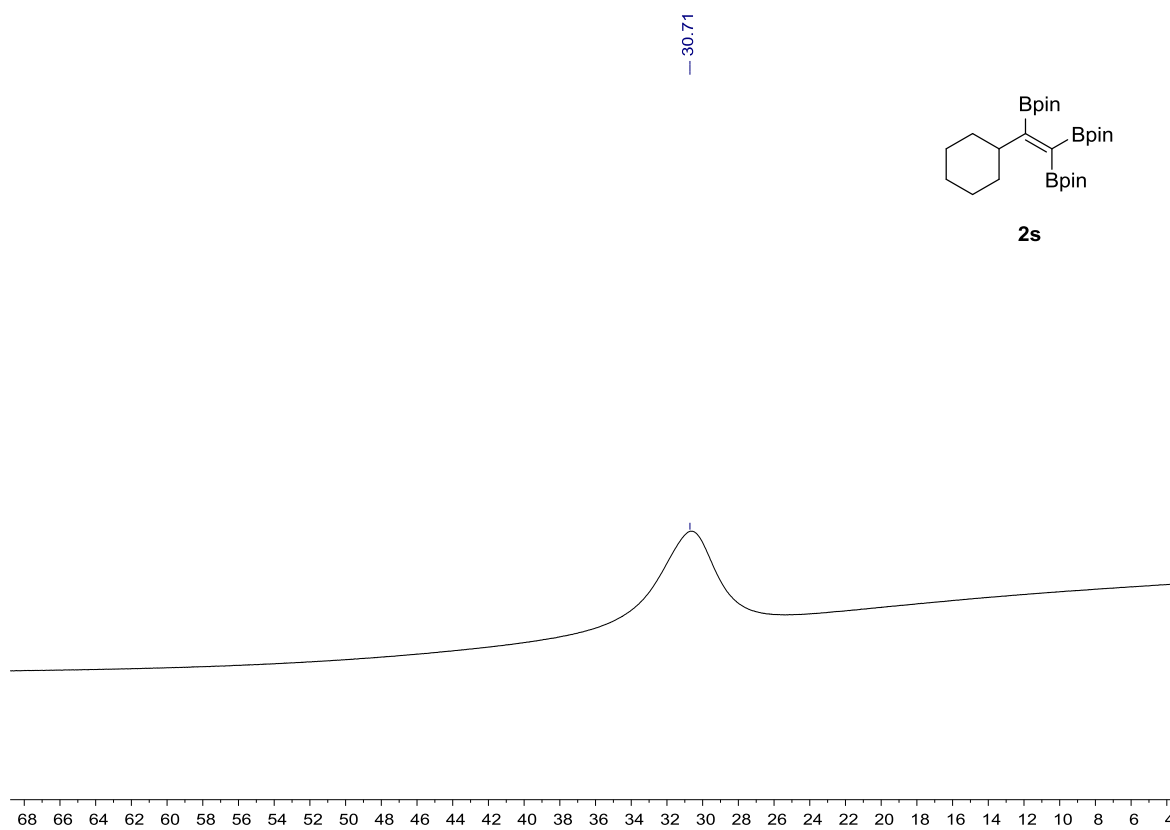

<sup>1</sup>H NMR spectrum (500 MHz, CDCl<sub>3</sub>) of **2t**

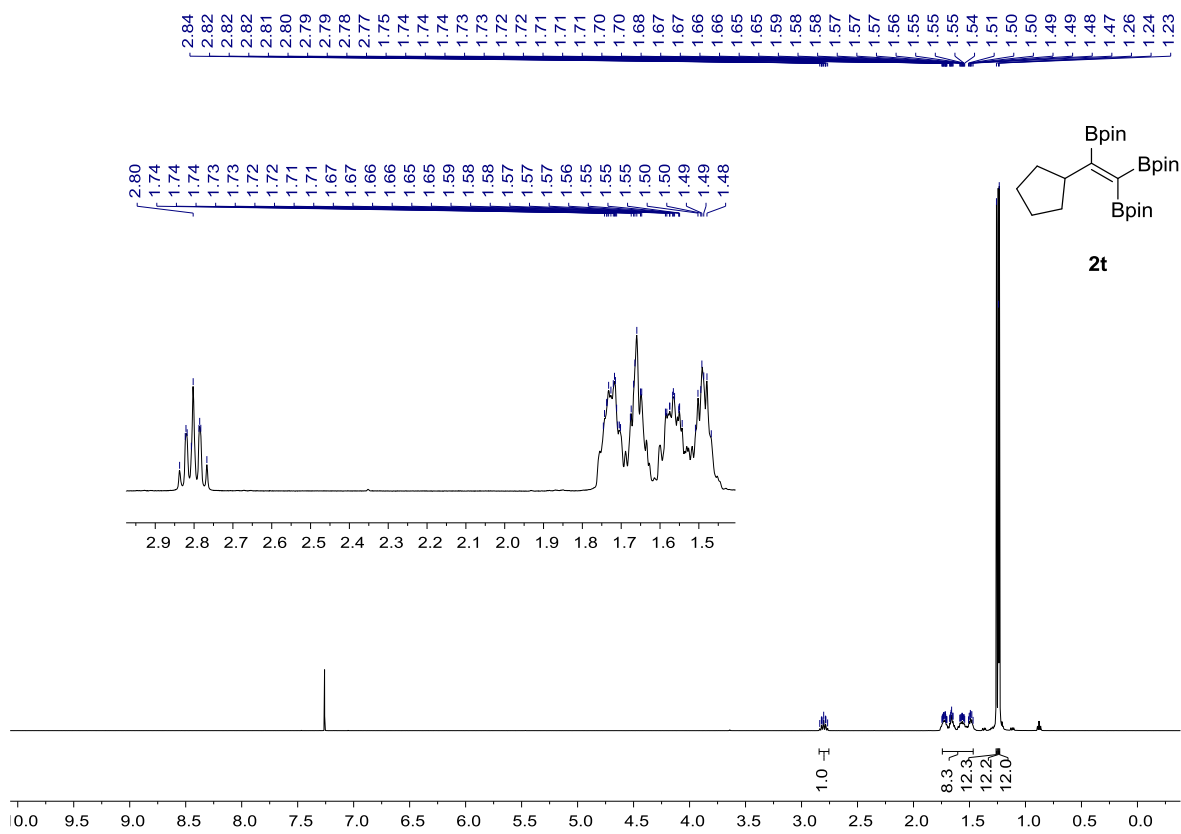

<sup>13</sup>C{<sup>1</sup>H} NMR spectrum (125 MHz, CDCl<sub>3</sub>) of **2t**

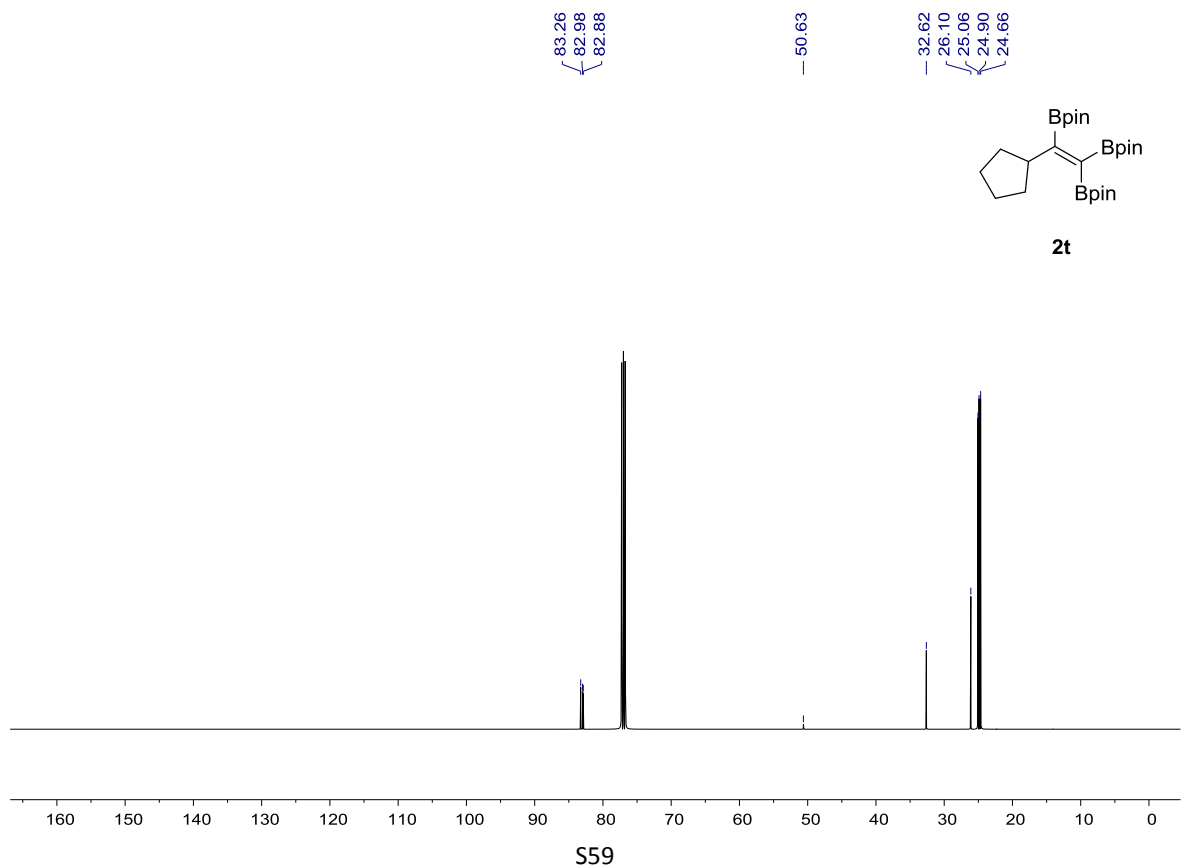



$^{13}\text{C}\{^1\text{H}\}$  NMR spectrum (125 MHz,  $\text{CDCl}_3$ ) of **2u**

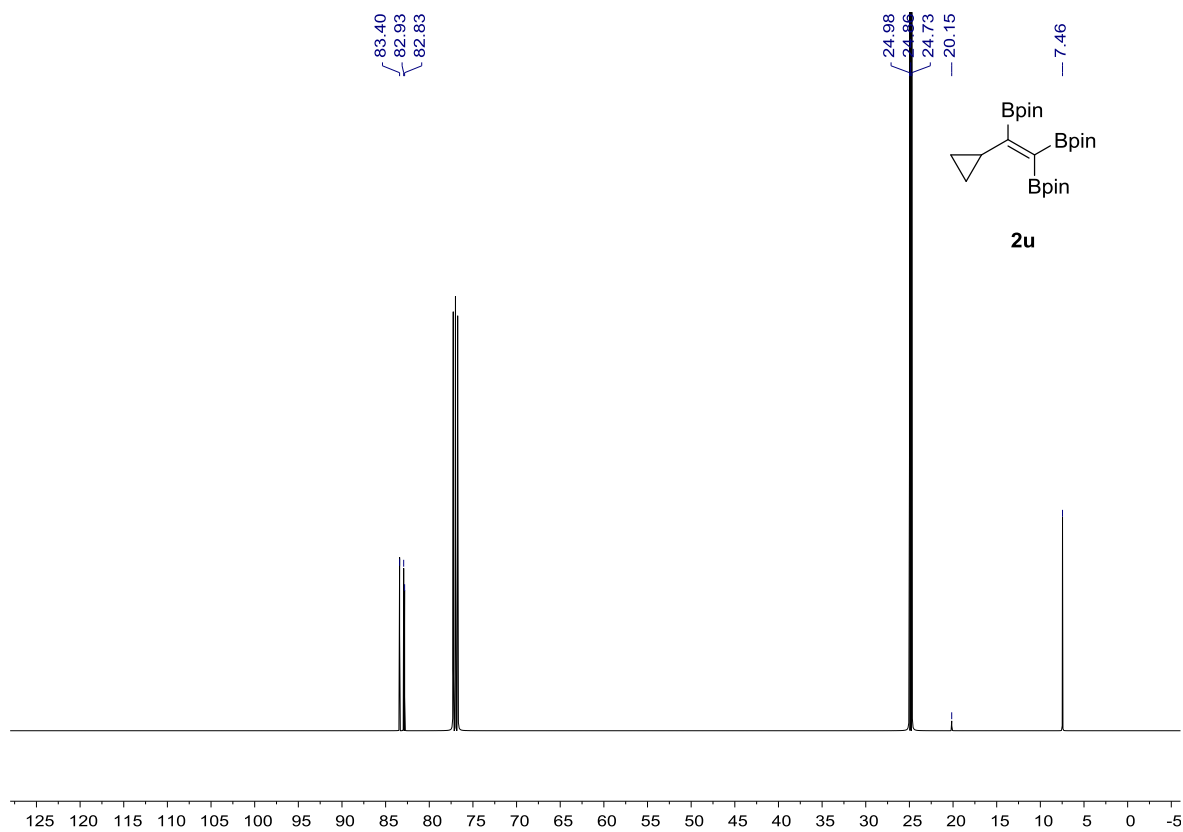

$^{11}\text{B}$  NMR spectrum (160 MHz,  $\text{CDCl}_3$ ) of **2u**

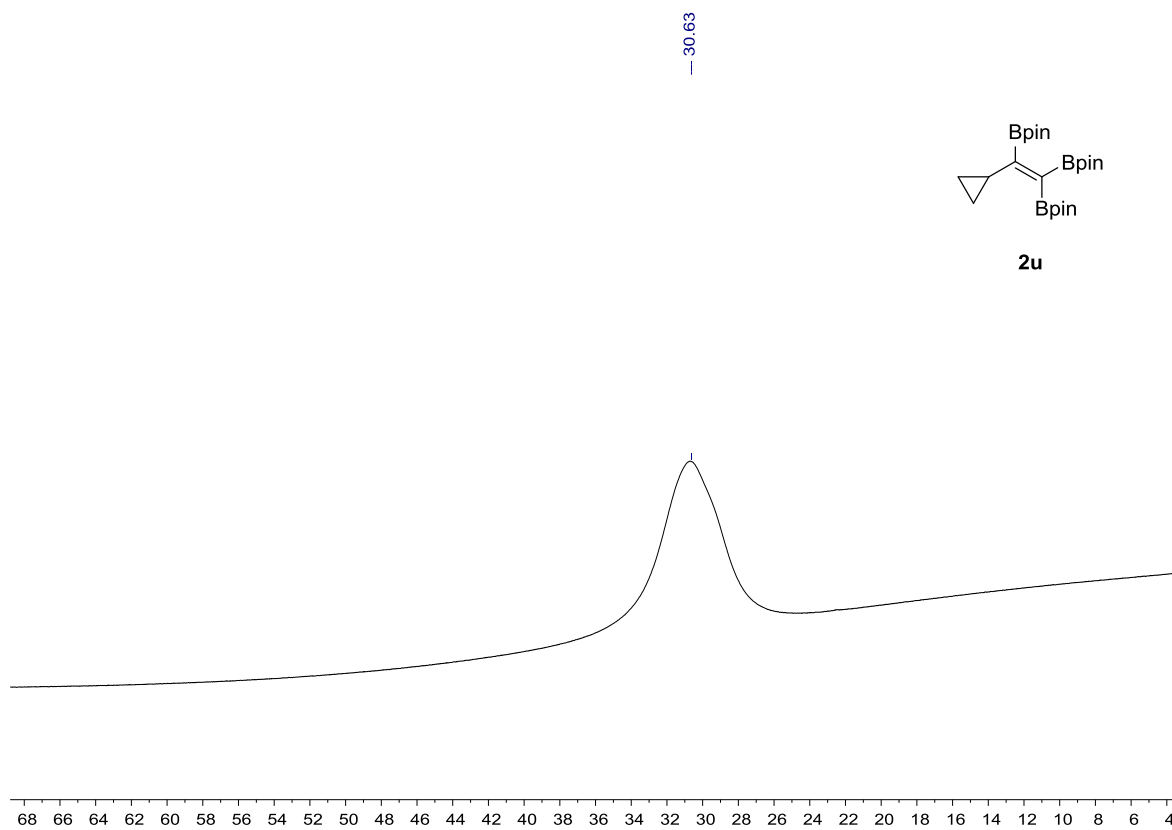

<sup>1</sup>H NMR spectrum (500 MHz, CDCl<sub>3</sub>) of **2v**

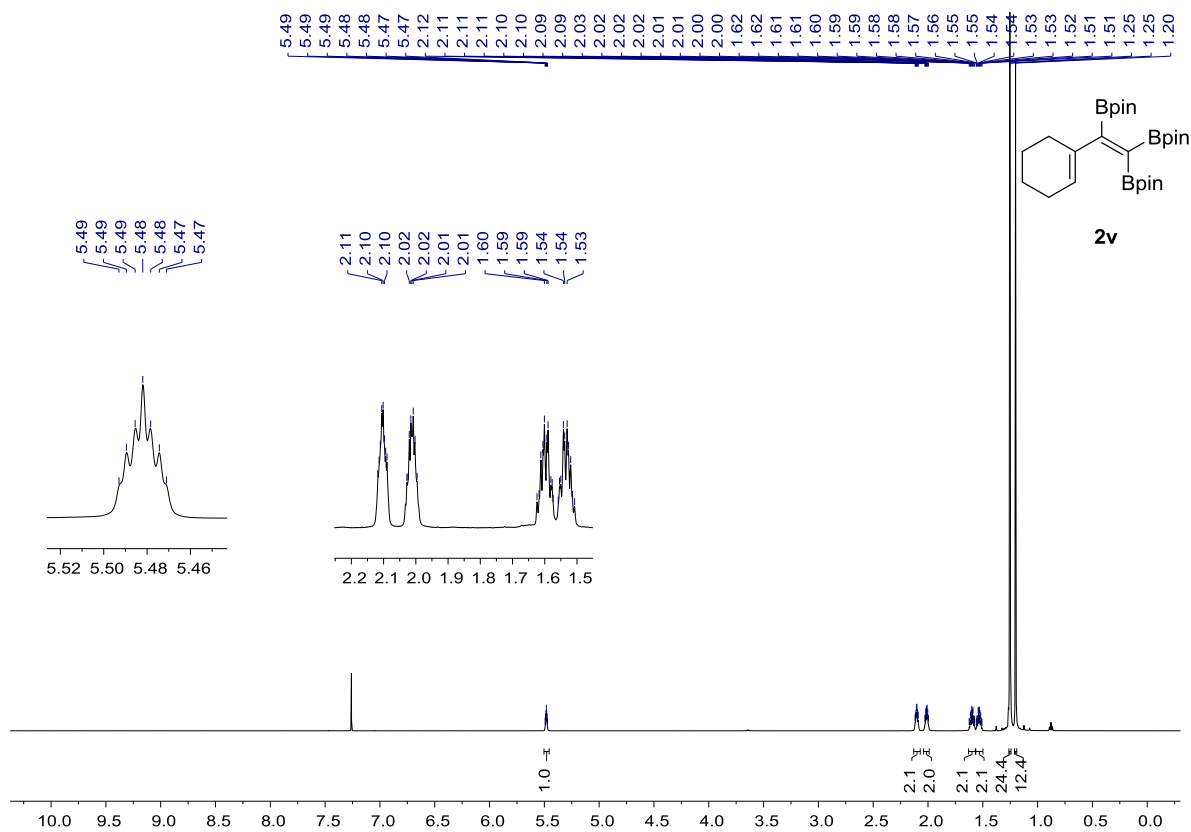

<sup>13</sup>C{<sup>1</sup>H} NMR spectrum (125 MHz, CDCl<sub>3</sub>) of **2v**

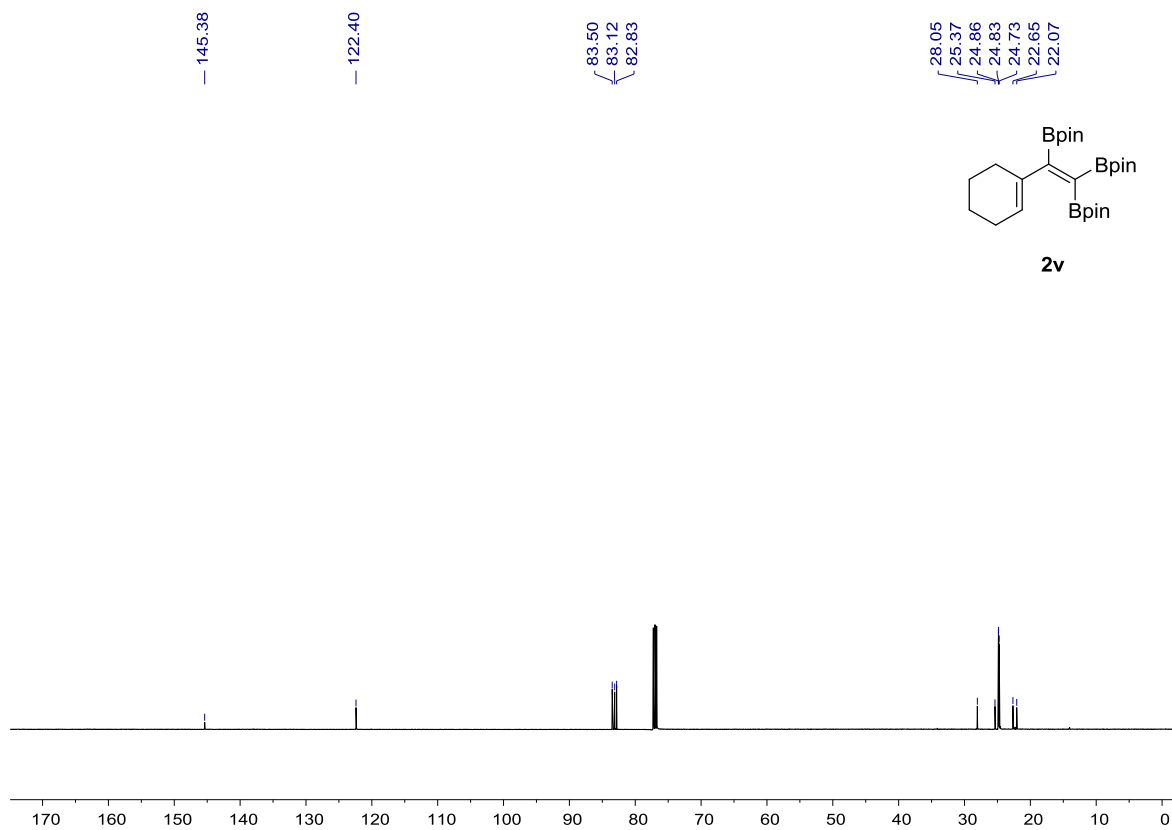

$^{11}\text{B}$  NMR spectrum (160 MHz,  $\text{CDCl}_3$ ) of **2v**

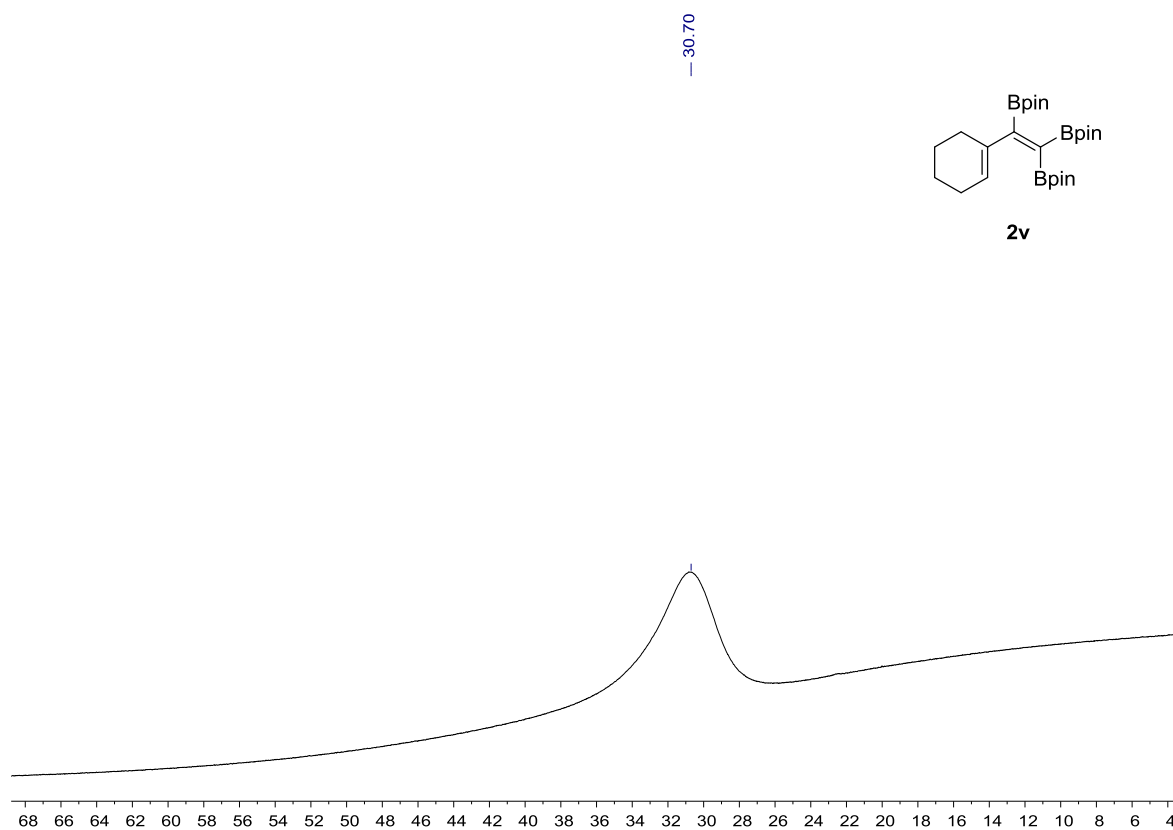

$^1\text{H}$  NMR spectrum (300 MHz,  $\text{CDCl}_3$ ) of **6a**

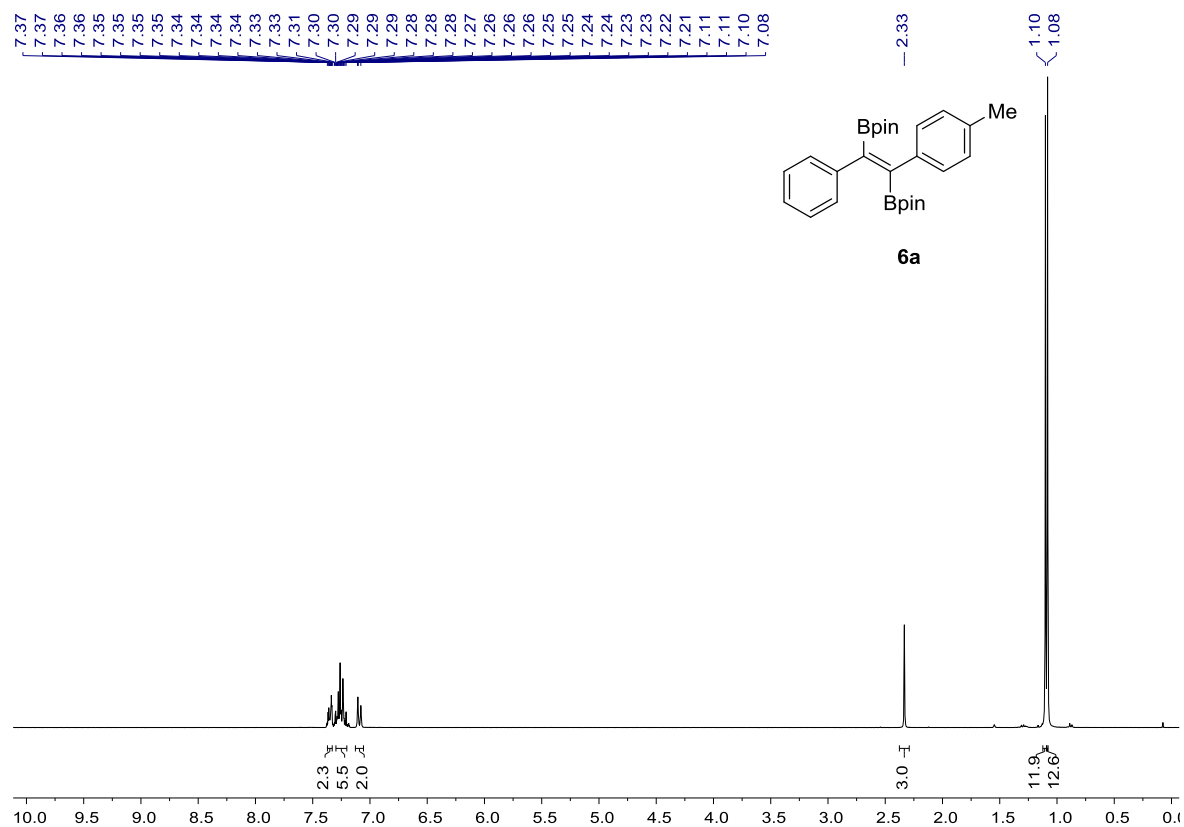



$^{13}\text{C}\{^1\text{H}\}$  NMR spectrum (75 MHz,  $\text{CDCl}_3$ ) of **6a**

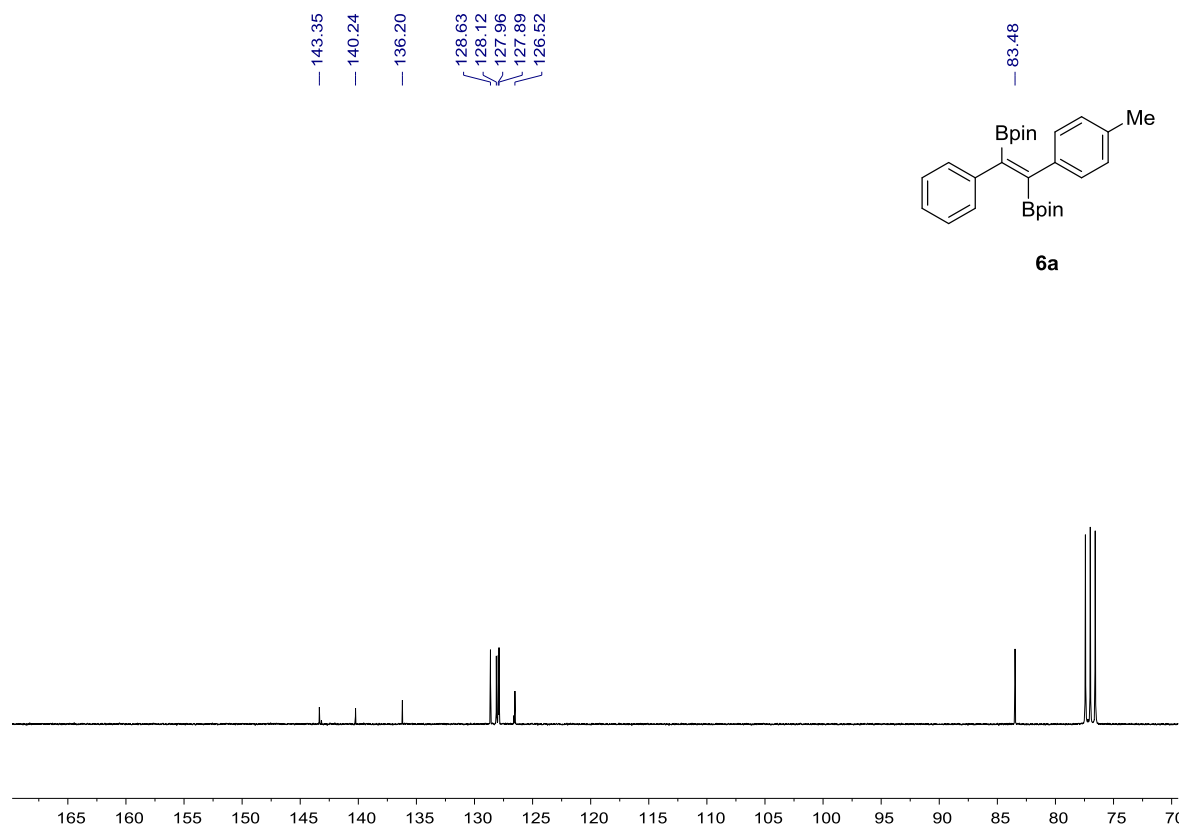

$^{11}\text{B}$  NMR spectrum (96 MHz,  $\text{CDCl}_3$ ) of **6a**

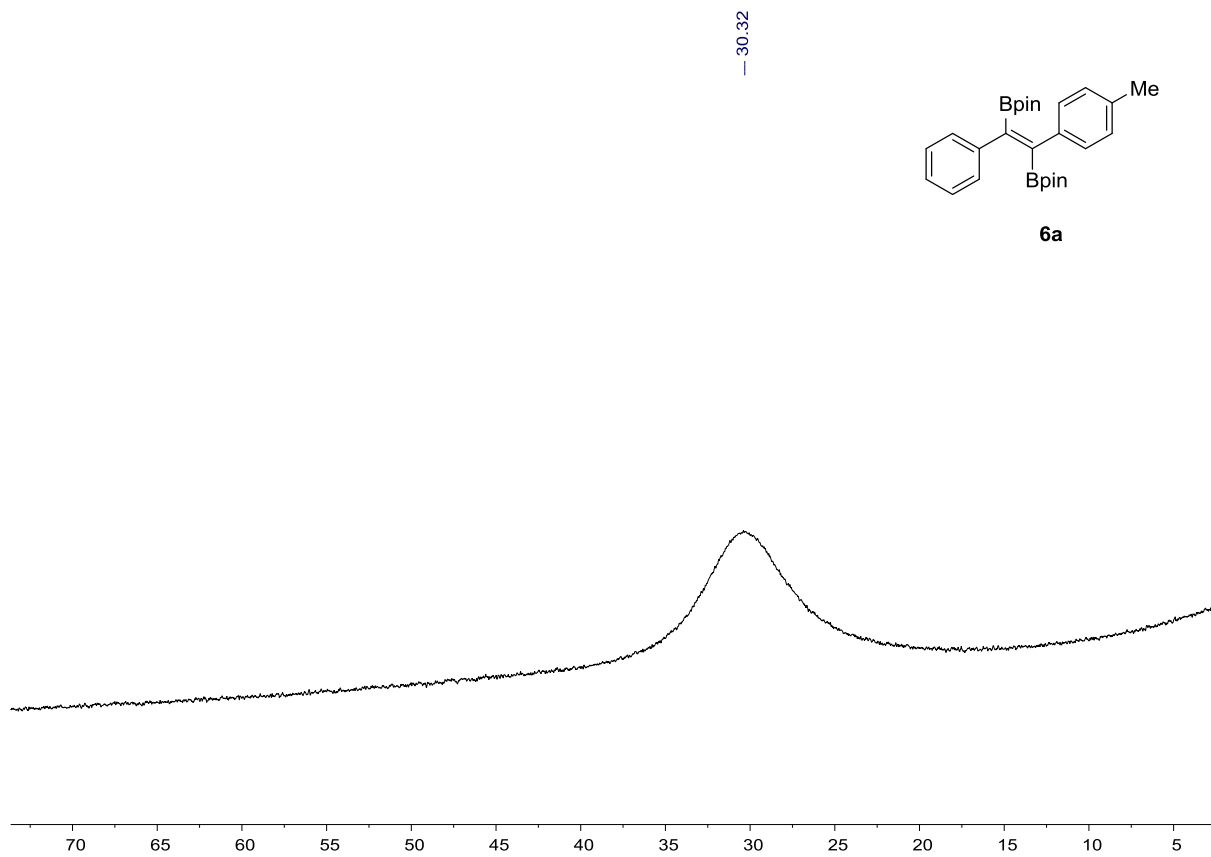

<sup>1</sup>H NMR spectrum (500 MHz, CDCl<sub>3</sub>) of **6b**

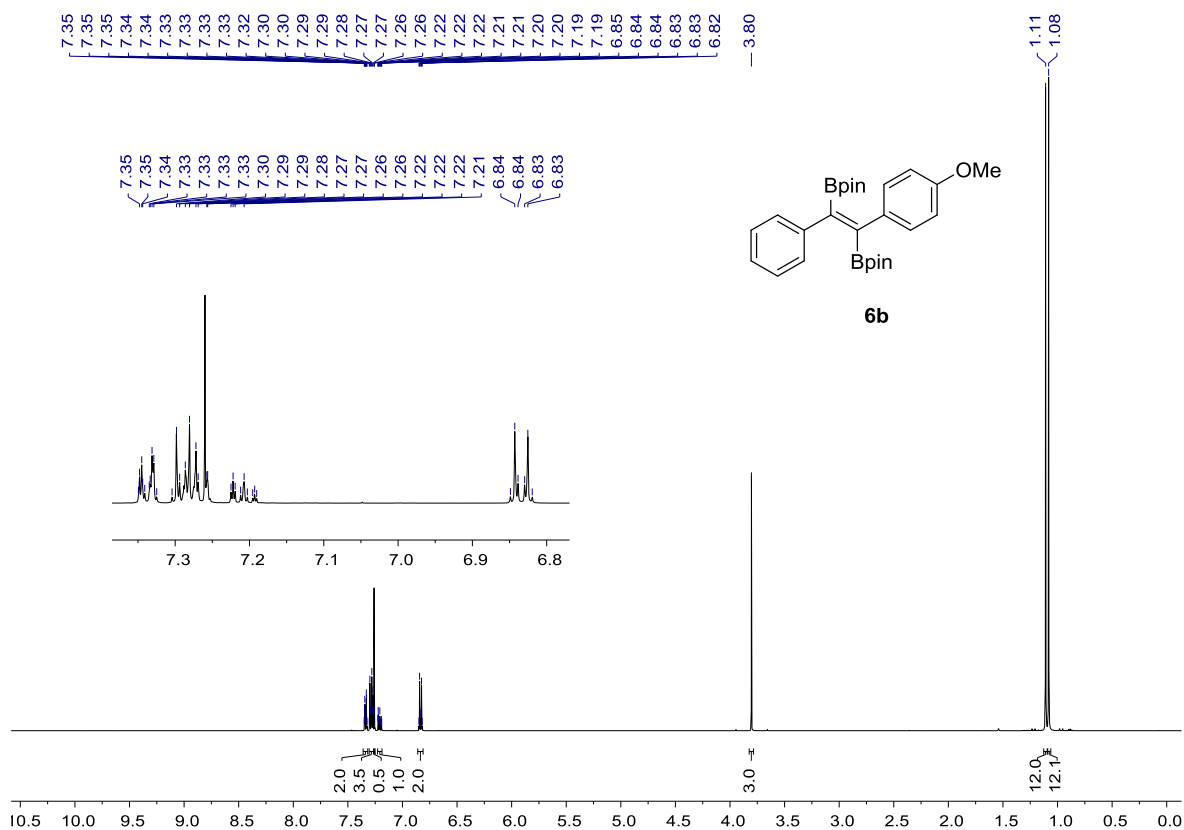

<sup>13</sup>C{<sup>1</sup>H} NMR spectrum (125 MHz, CDCl<sub>3</sub>) of **6b**

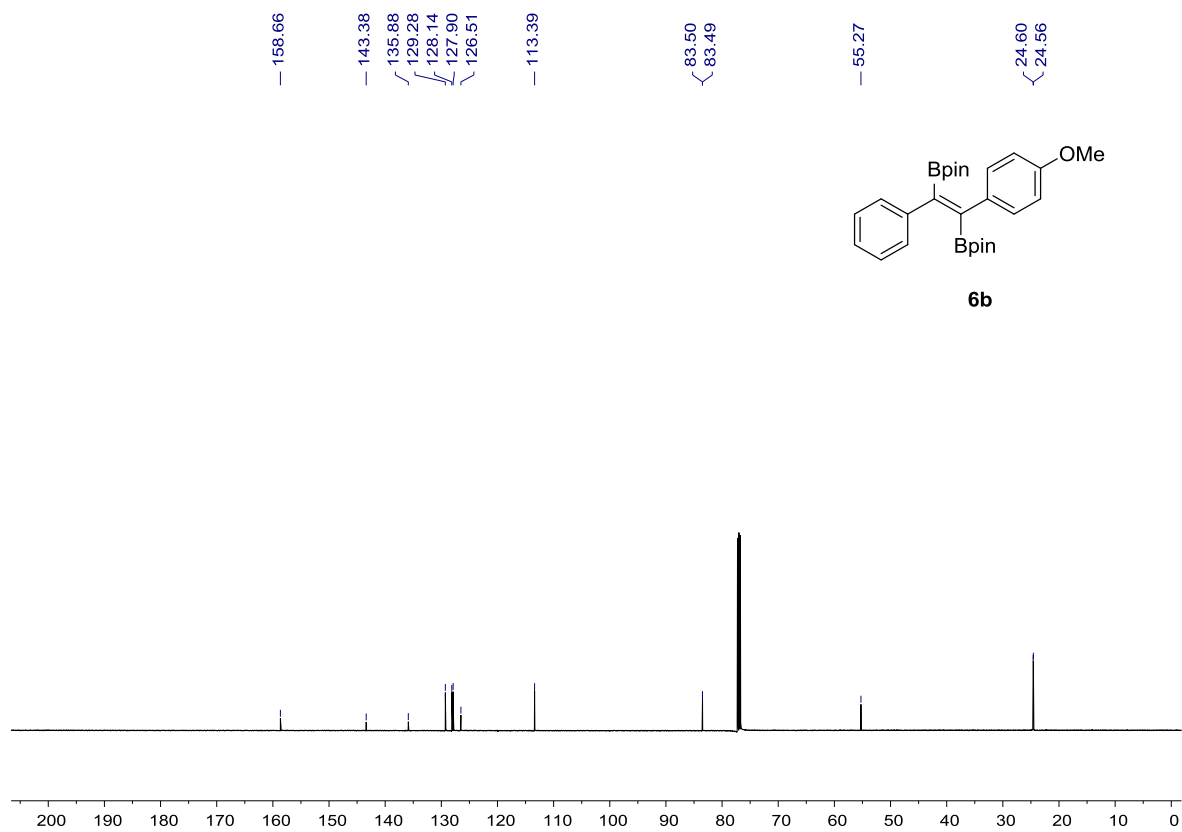

$^{11}\text{B}$  NMR spectrum (160 MHz,  $\text{CDCl}_3$ ) of **6b**

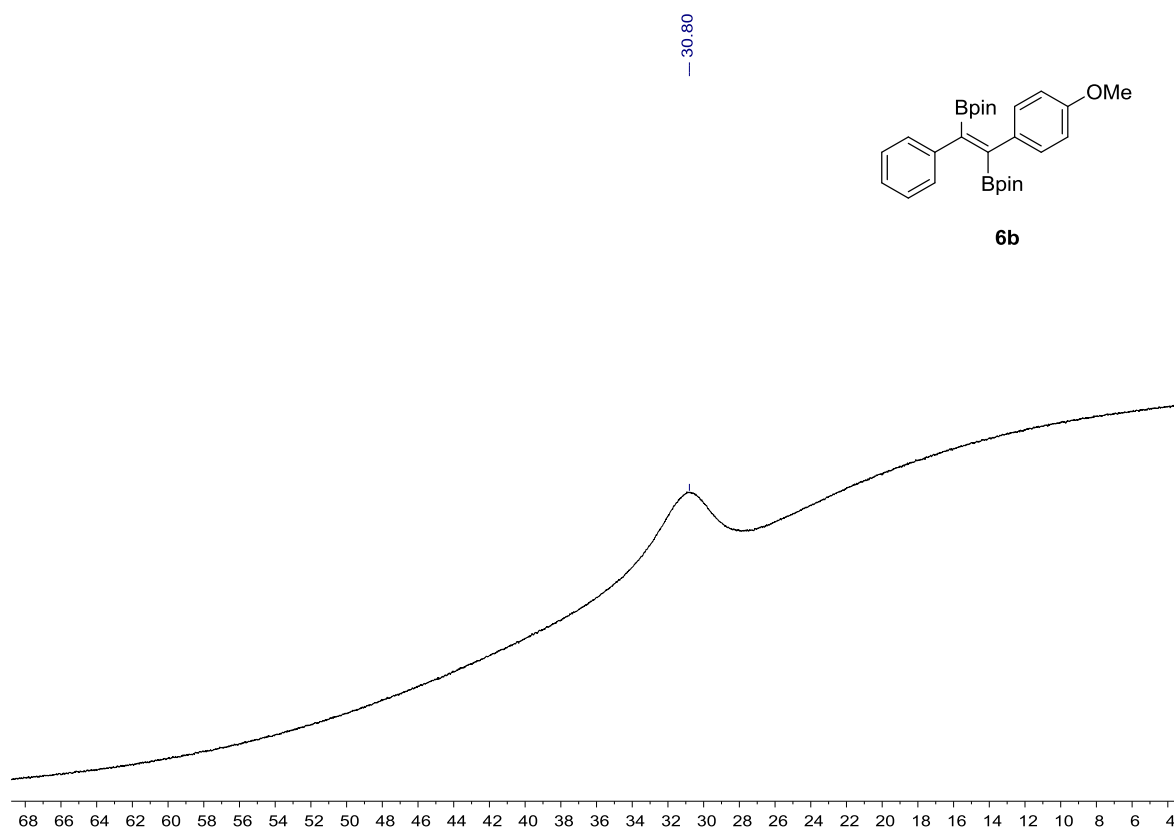

$^1\text{H}$  NMR spectrum (500 MHz,  $\text{CDCl}_3$ ) of **7a**

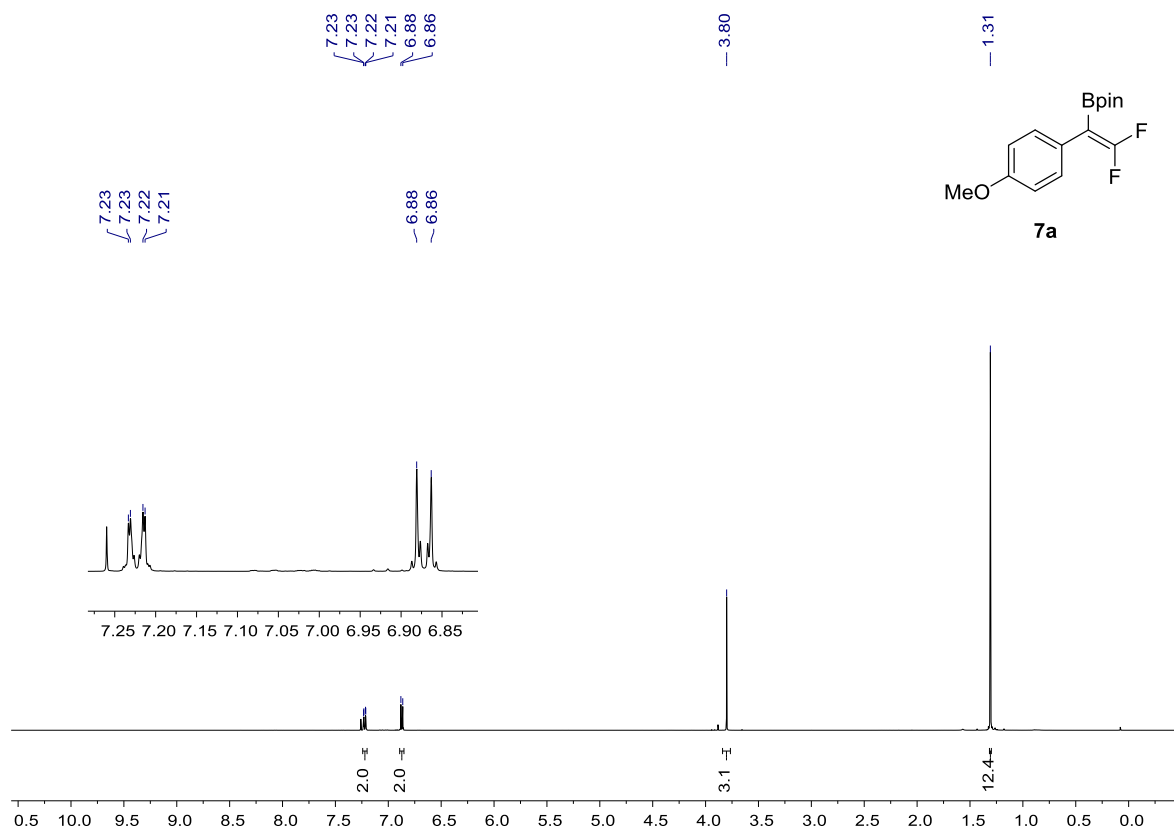

$^{13}\text{C}\{^1\text{H}\}$  NMR spectrum (125 MHz,  $\text{CDCl}_3$ ) of **7a**

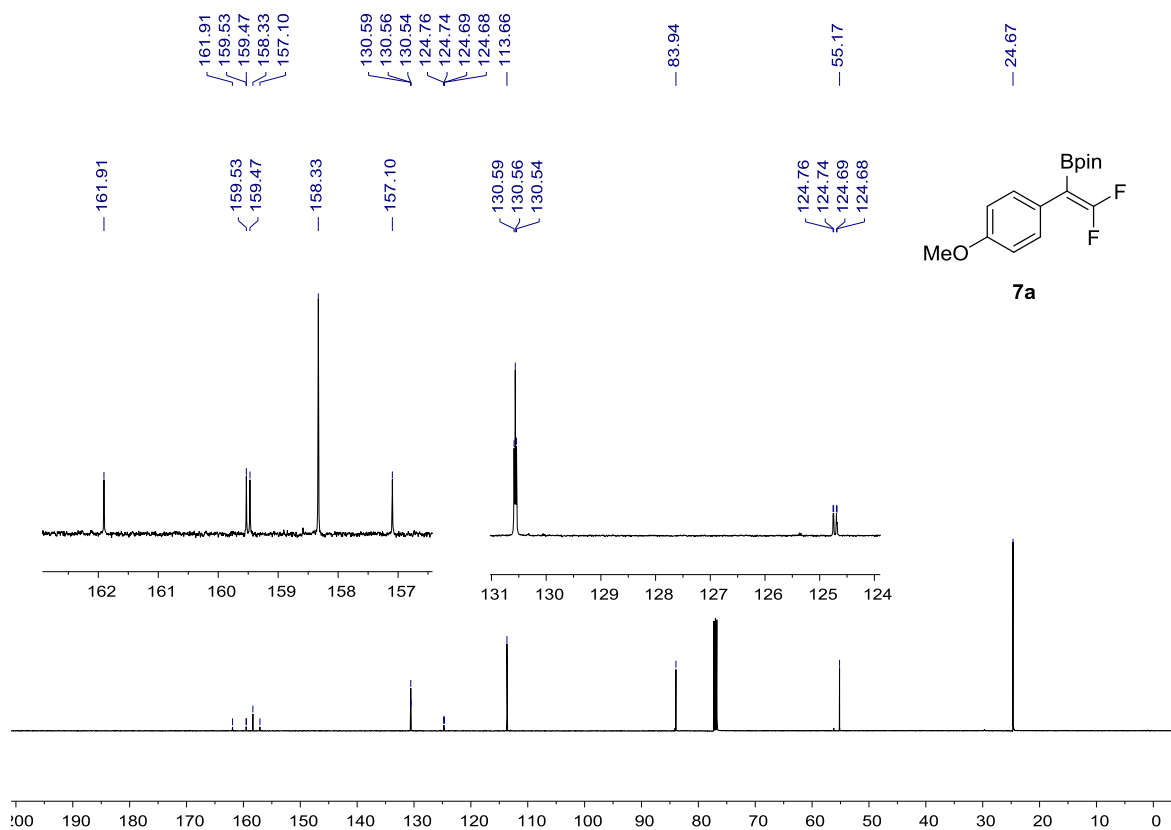

$^{11}\text{B}$  NMR spectrum (160 MHz,  $\text{CDCl}_3$ ) of **7a**

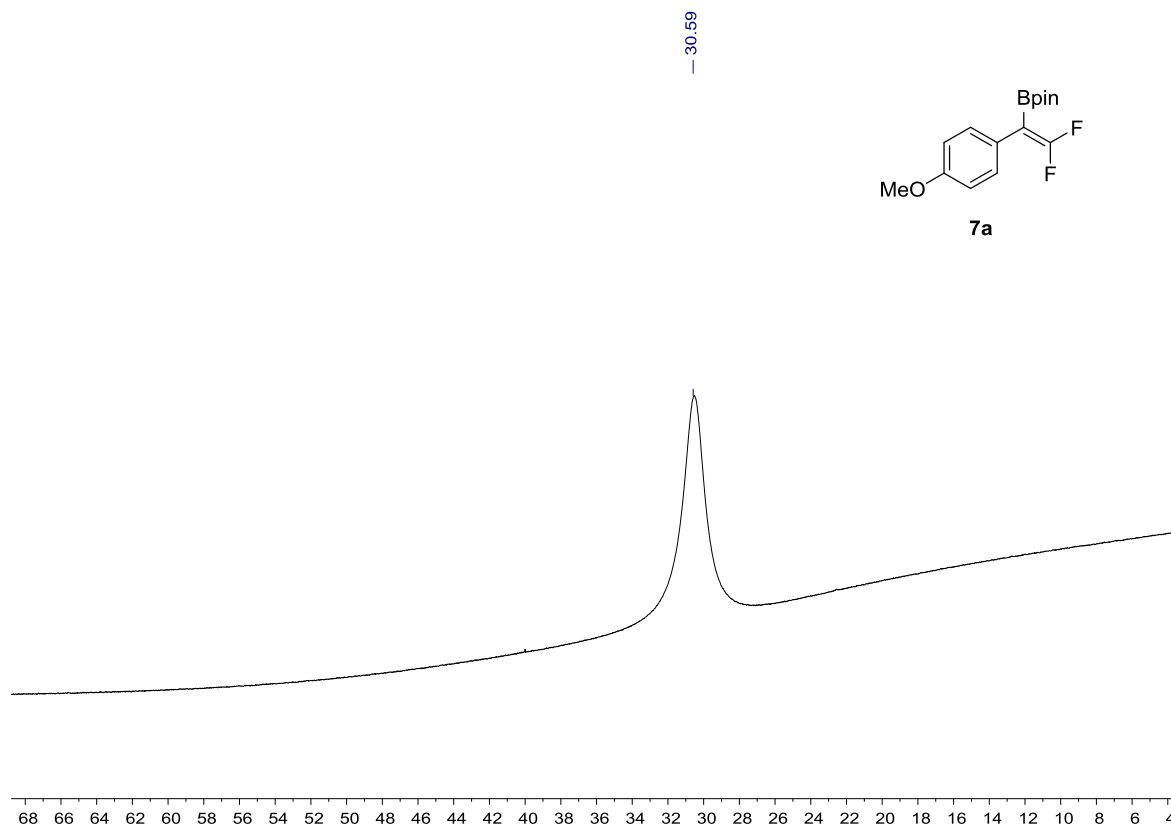

$^{19}\text{F}$  NMR spectrum (470 MHz,  $\text{CDCl}_3$ ) of **7a**

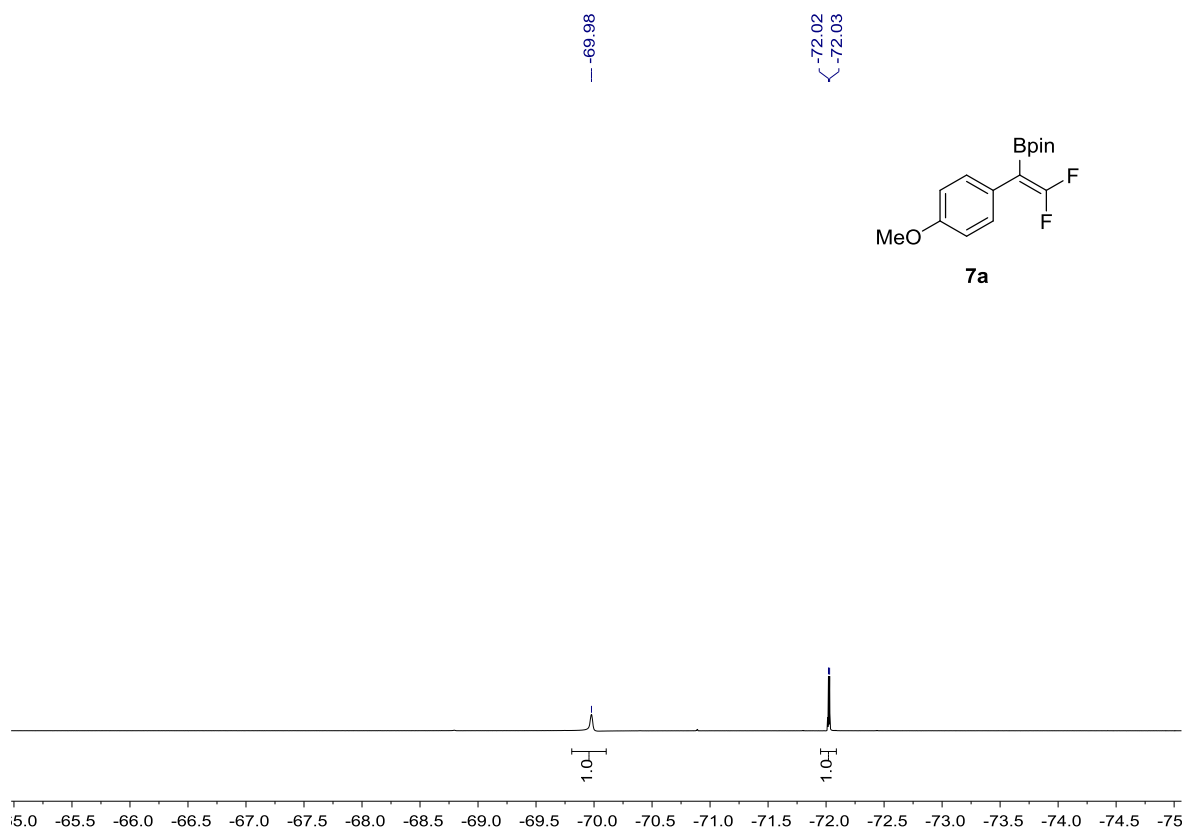

$^1\text{H}$  NMR spectrum (300 MHz,  $\text{CDCl}_3$ ) of **8a**

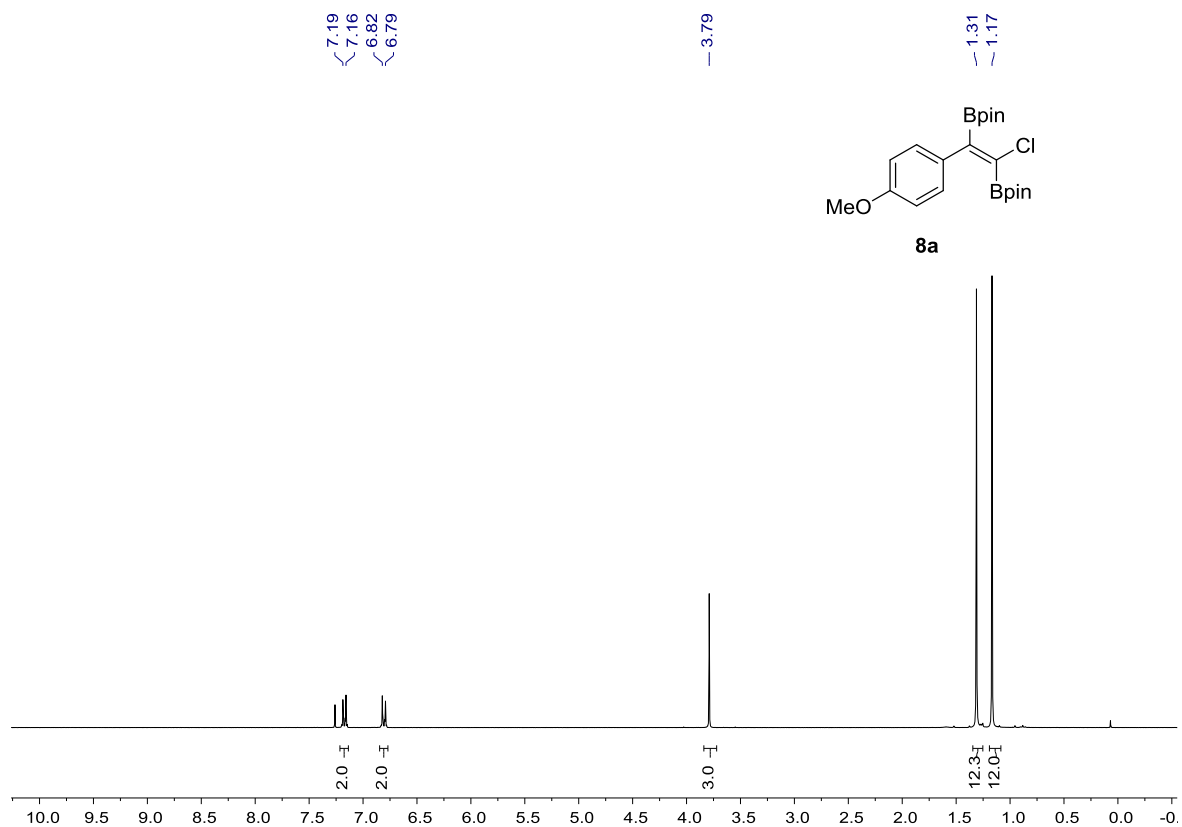

$^{13}\text{C}\{^1\text{H}\}$  NMR spectrum (75 MHz,  $\text{CDCl}_3$ ) of **8a**

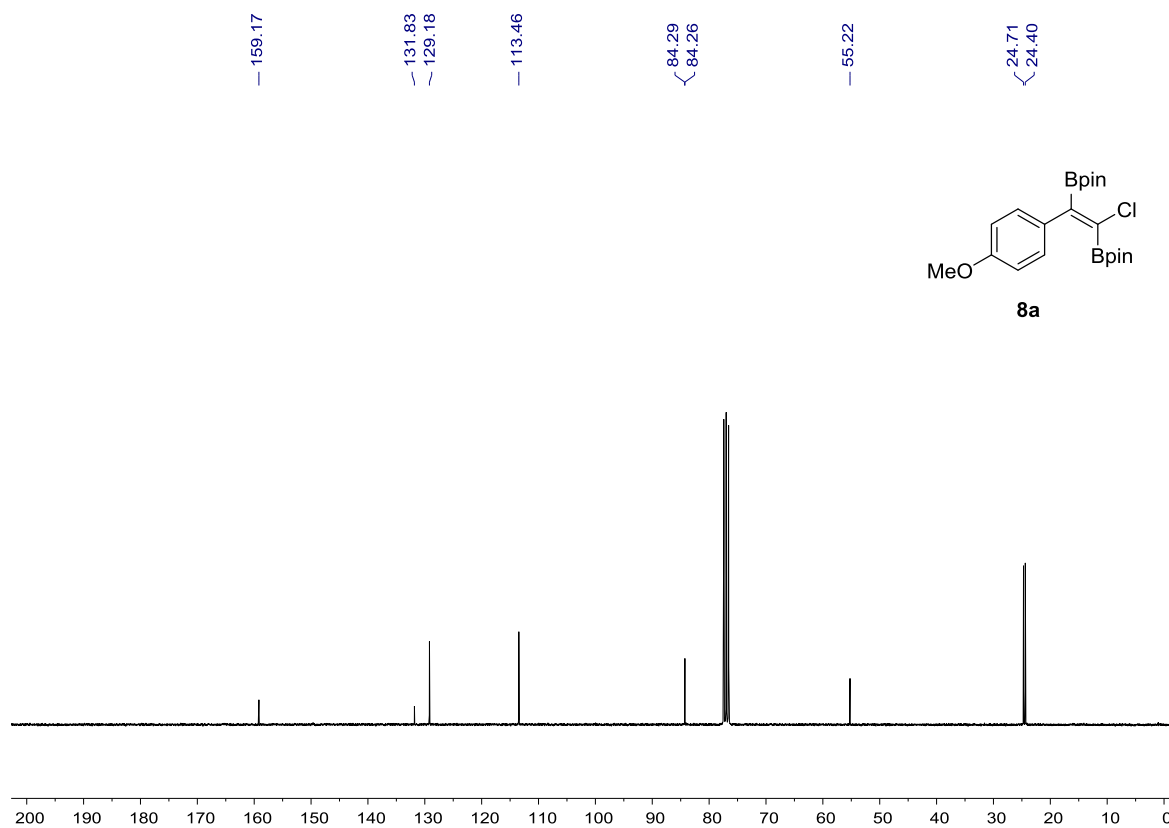

$^{11}\text{B}$  NMR spectrum (96 MHz,  $\text{CDCl}_3$ ) of **8a**

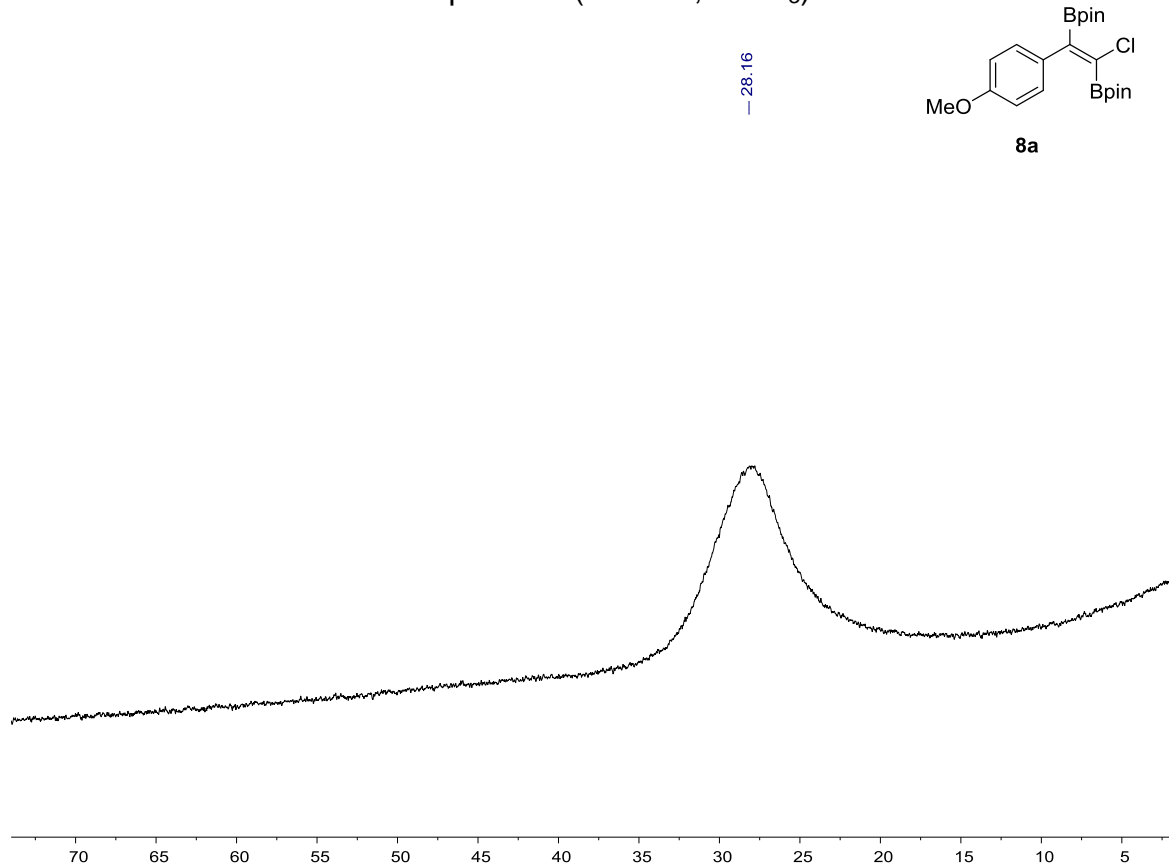

$^1\text{H}$  NMR spectrum (300 MHz,  $\text{CDCl}_3$ ) of **9a**

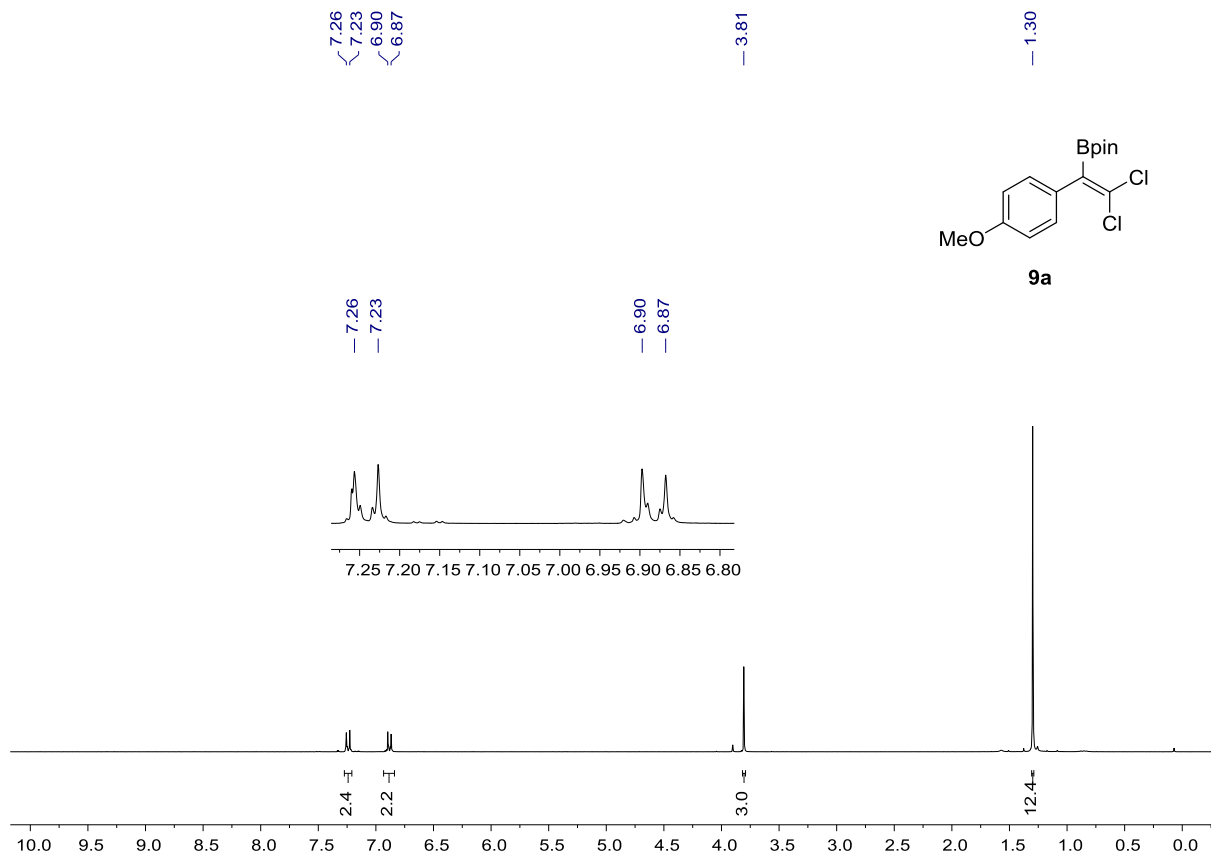

$^{13}\text{C}\{^1\text{H}\}$  NMR spectrum (75 MHz,  $\text{CDCl}_3$ ) of **9a**

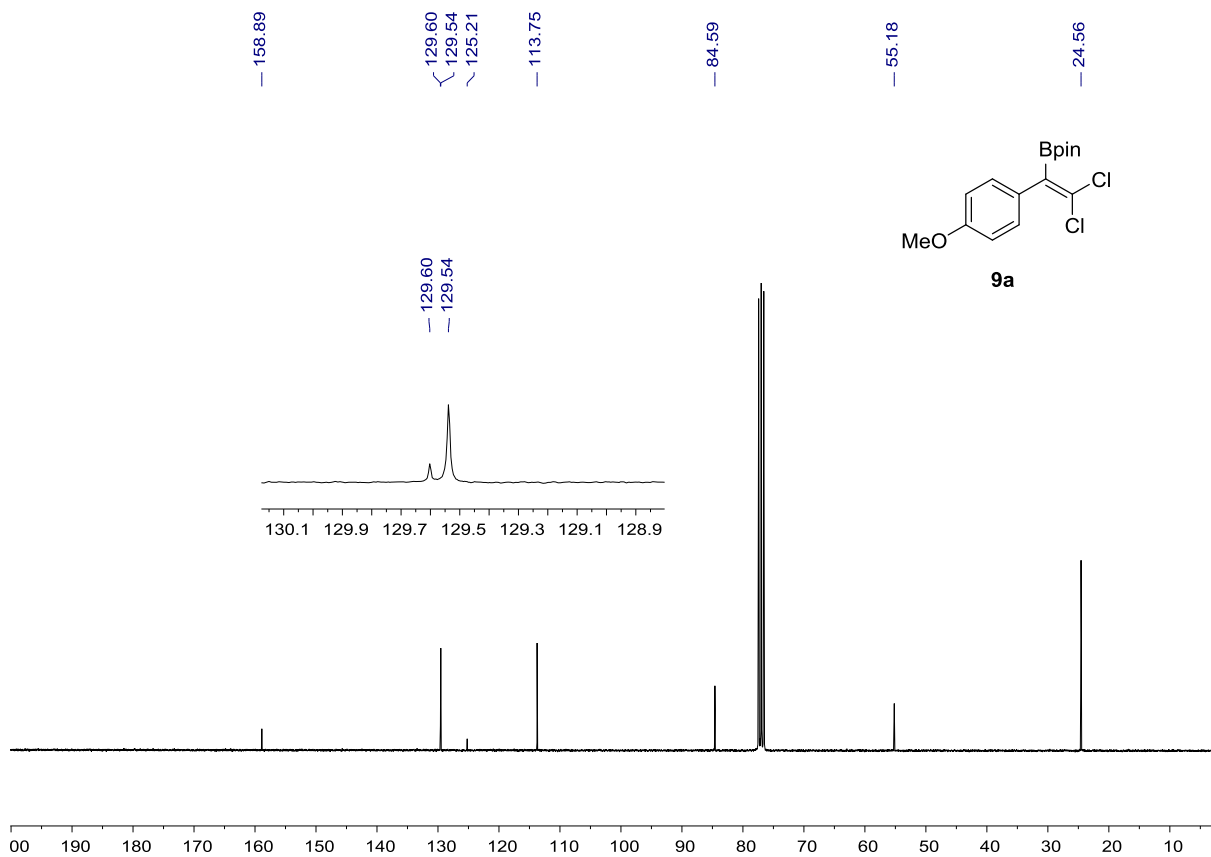

$^{11}\text{B}$  NMR spectrum (96 MHz,  $\text{CDCl}_3$ ) of **9a**

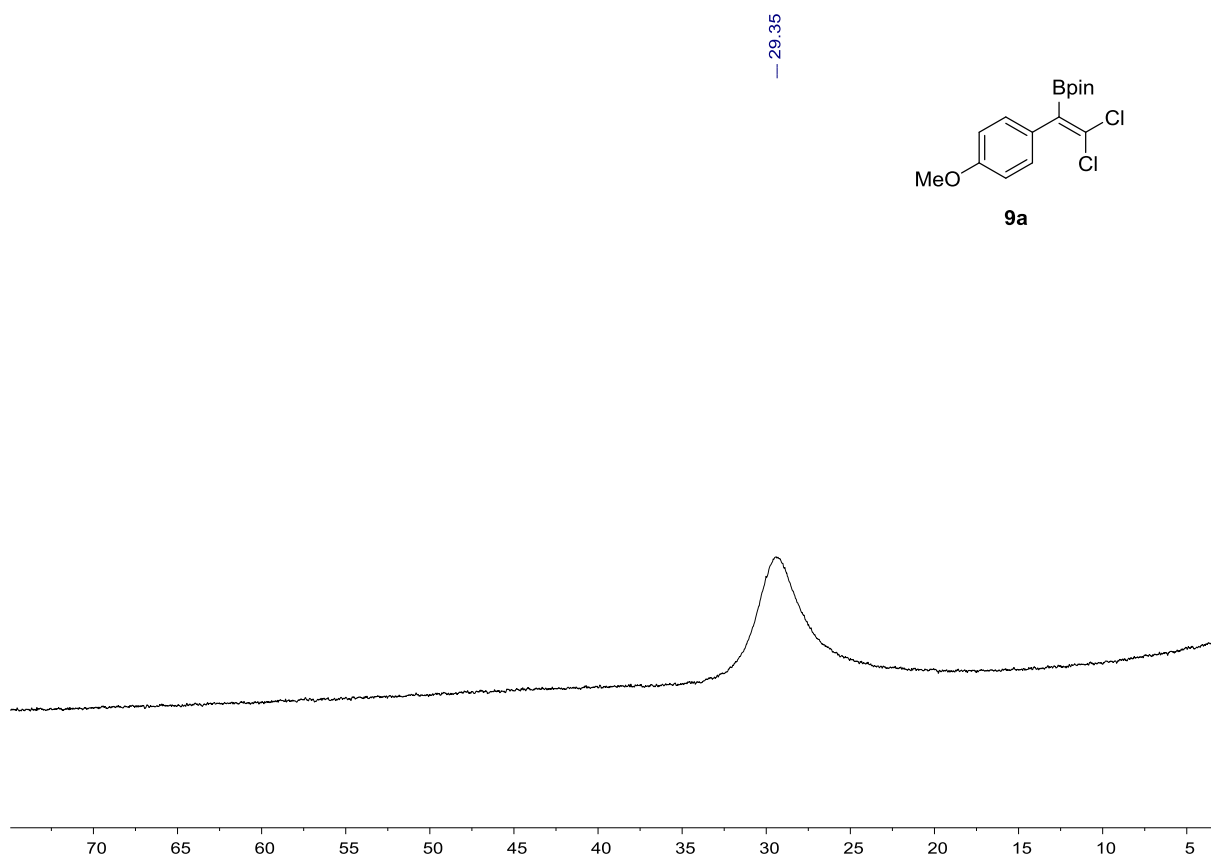

$^1\text{H}$  NMR spectrum (300 MHz,  $\text{CDCl}_3$ ) of **10a**

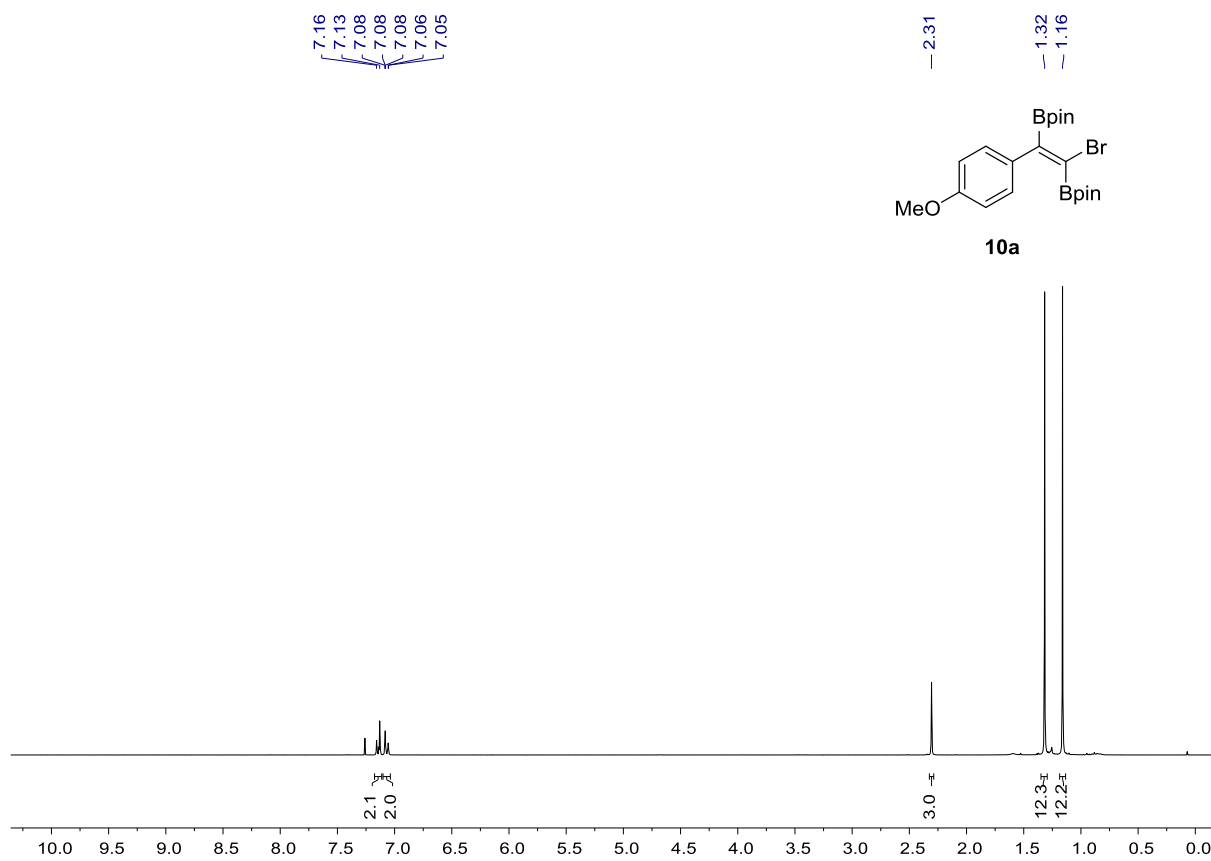



$^{13}\text{C}\{^1\text{H}\}$  NMR spectrum (75 MHz,  $\text{CDCl}_3$ ) of **10a**

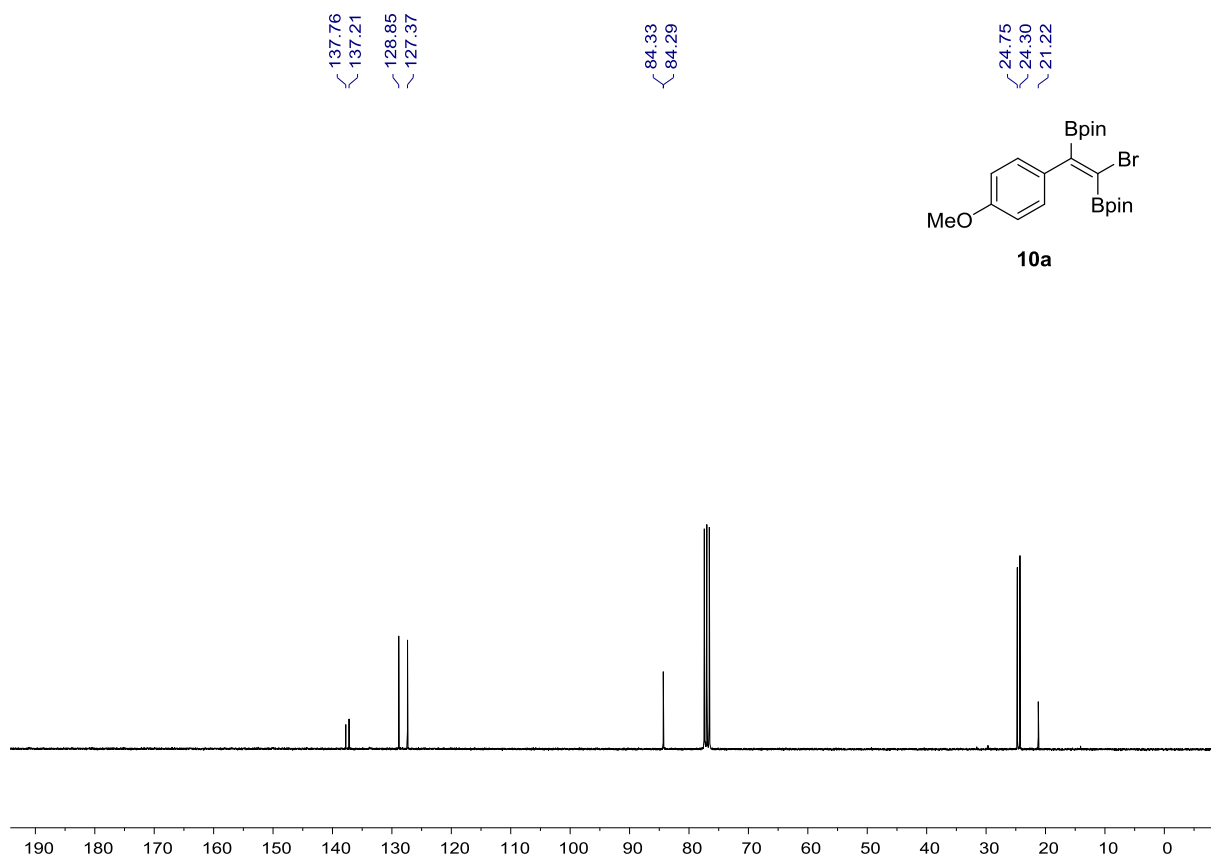

$^{11}\text{B}$  NMR spectrum (96 MHz,  $\text{CDCl}_3$ ) of **10a**

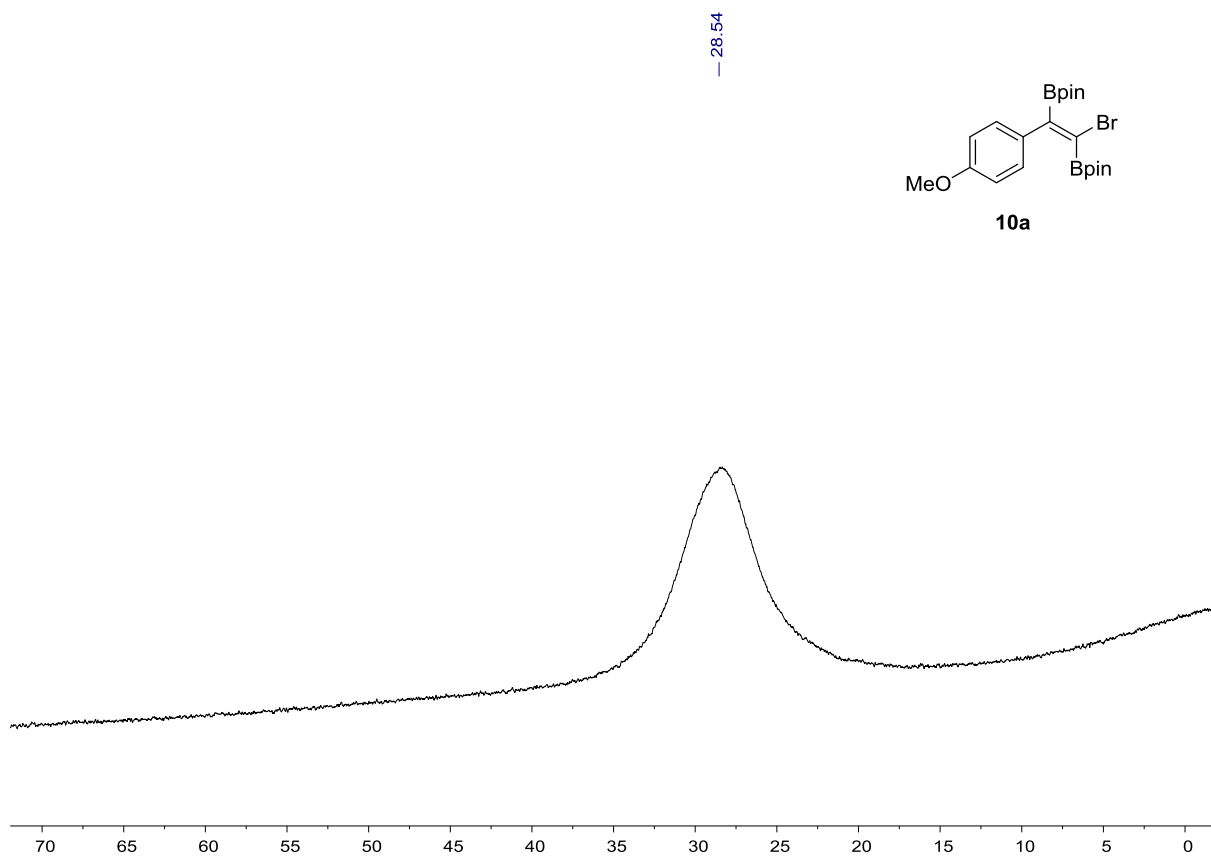

$^1\text{H}$  NMR spectrum (500 MHz,  $\text{CDCl}_3$ ) of **10b**

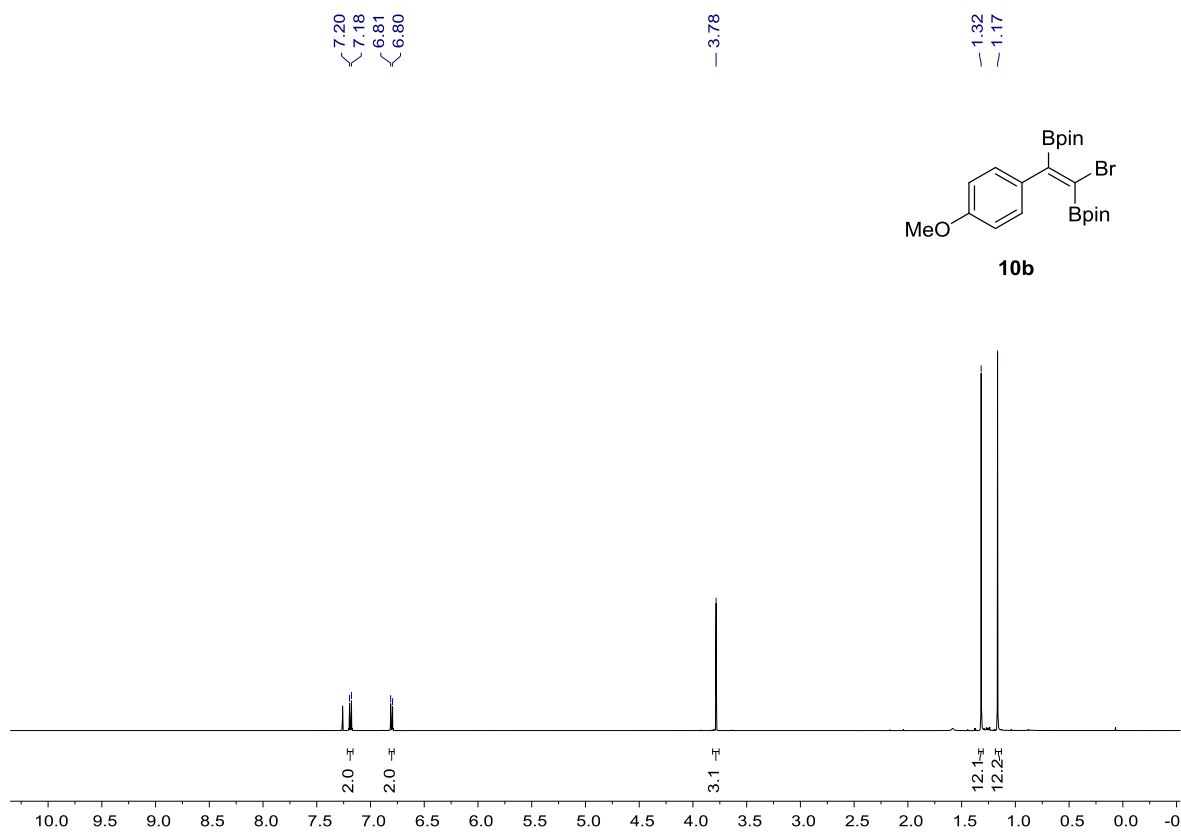

$^{13}\text{C}\{^1\text{H}\}$  NMR spectrum (125 MHz,  $\text{CDCl}_3$ ) of **10b**

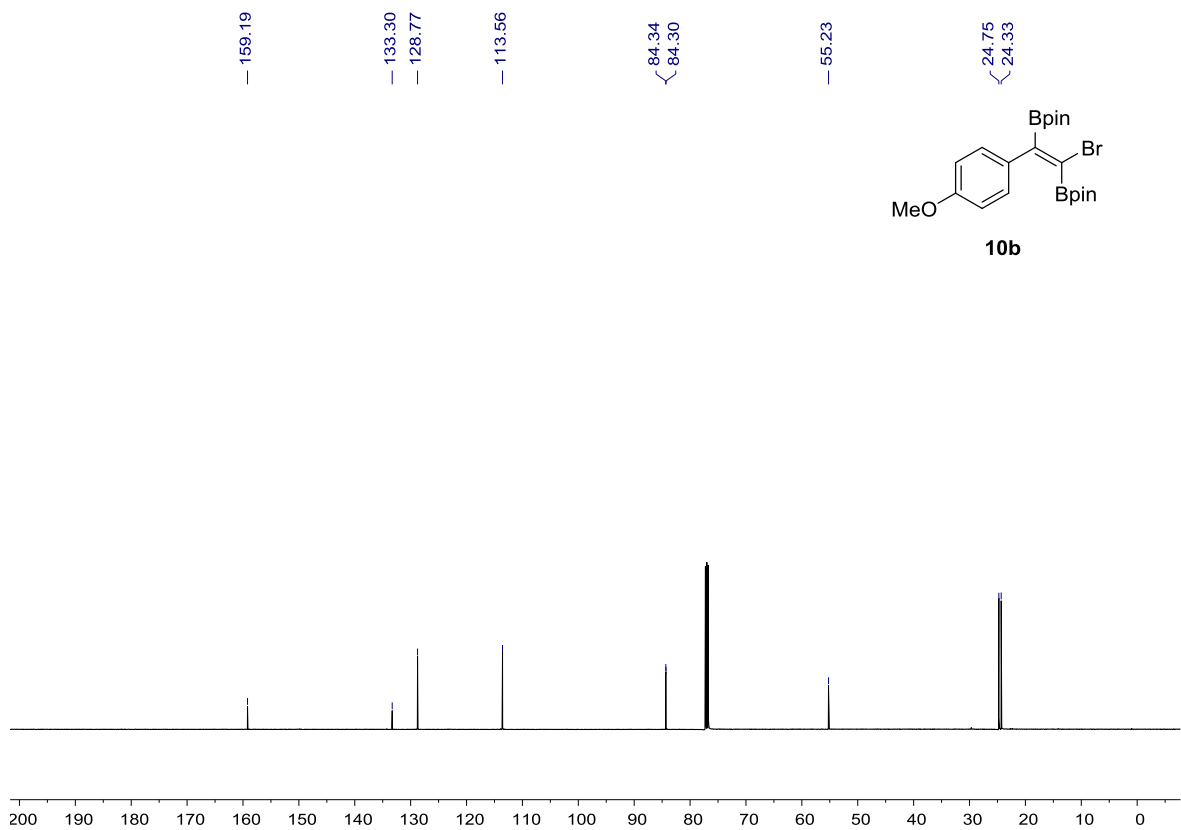

$^{11}\text{B}$  NMR spectrum (160 MHz,  $\text{CDCl}_3$ ) of **10b**

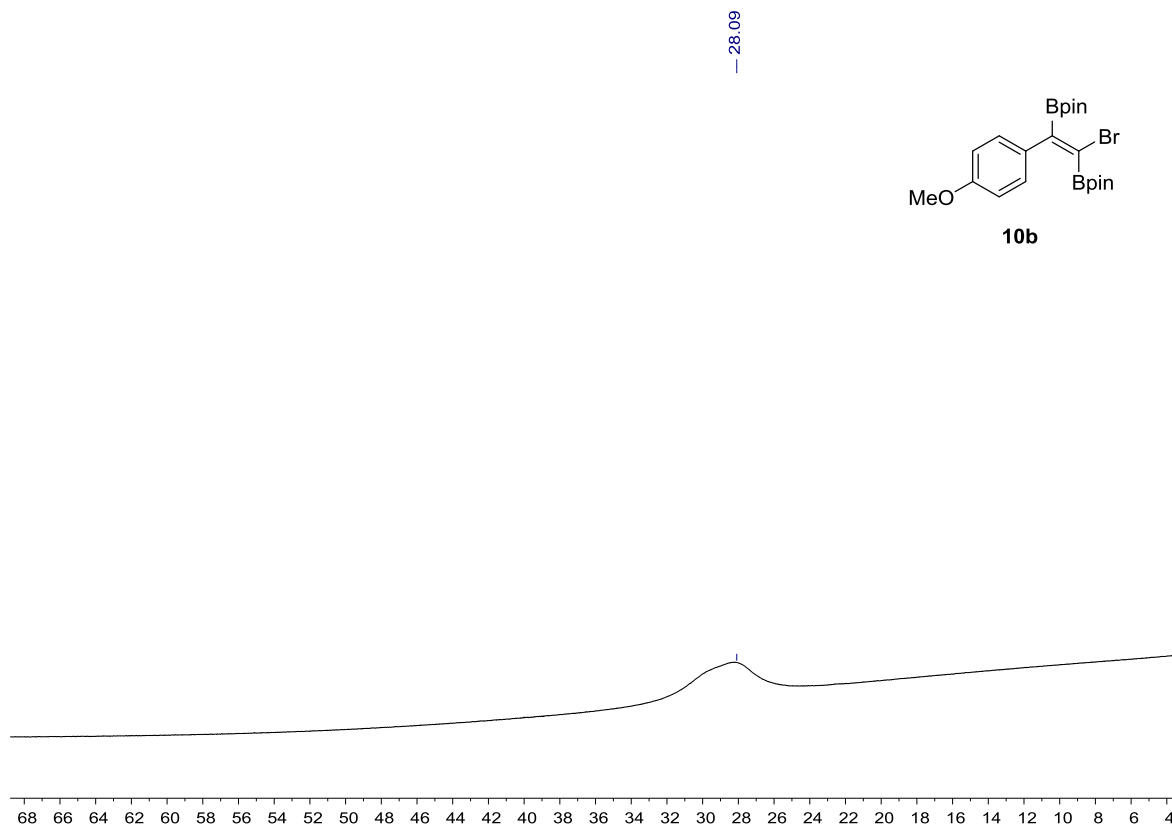

$^1\text{H}$  NMR spectrum (500 MHz,  $\text{CDCl}_3$ ) of **11a**

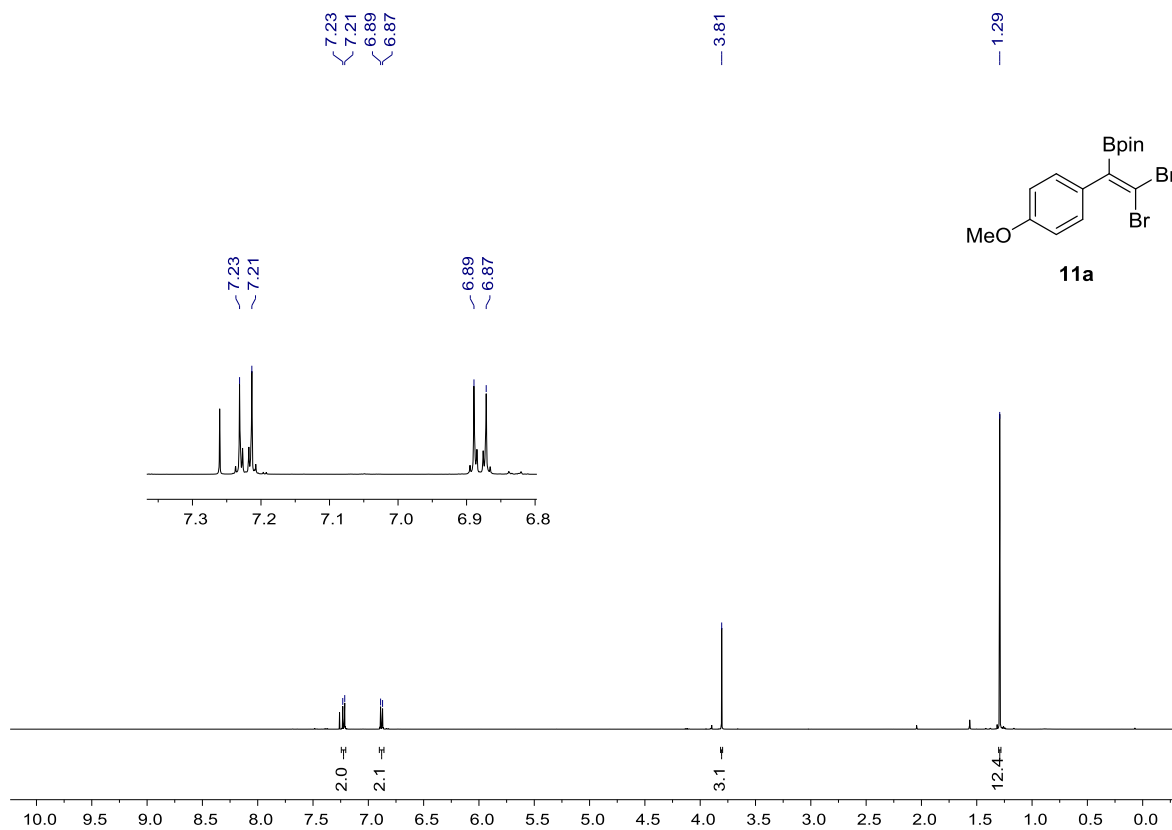



<sup>1</sup>H NMR spectrum (300 MHz, CDCl<sub>3</sub>) of **4a**

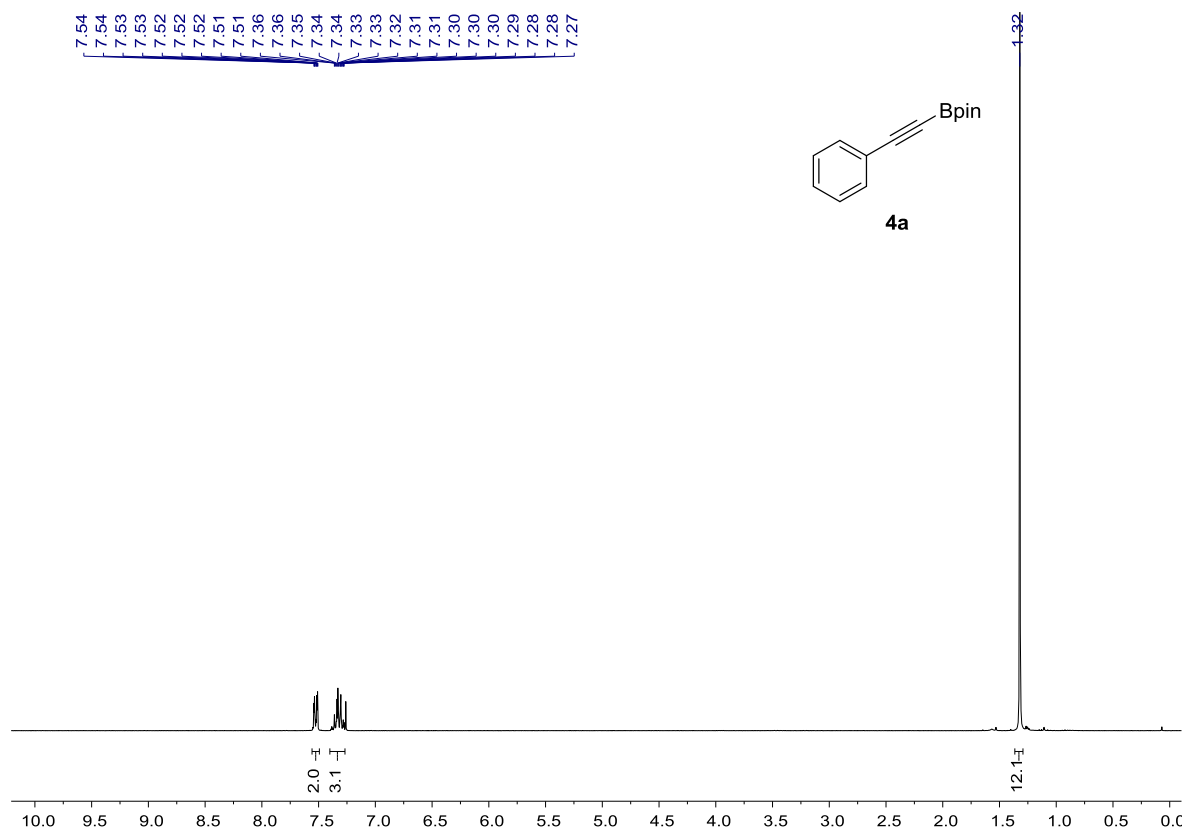

<sup>13</sup>C{<sup>1</sup>H} NMR spectrum (75 MHz, CDCl<sub>3</sub>) of **4a**

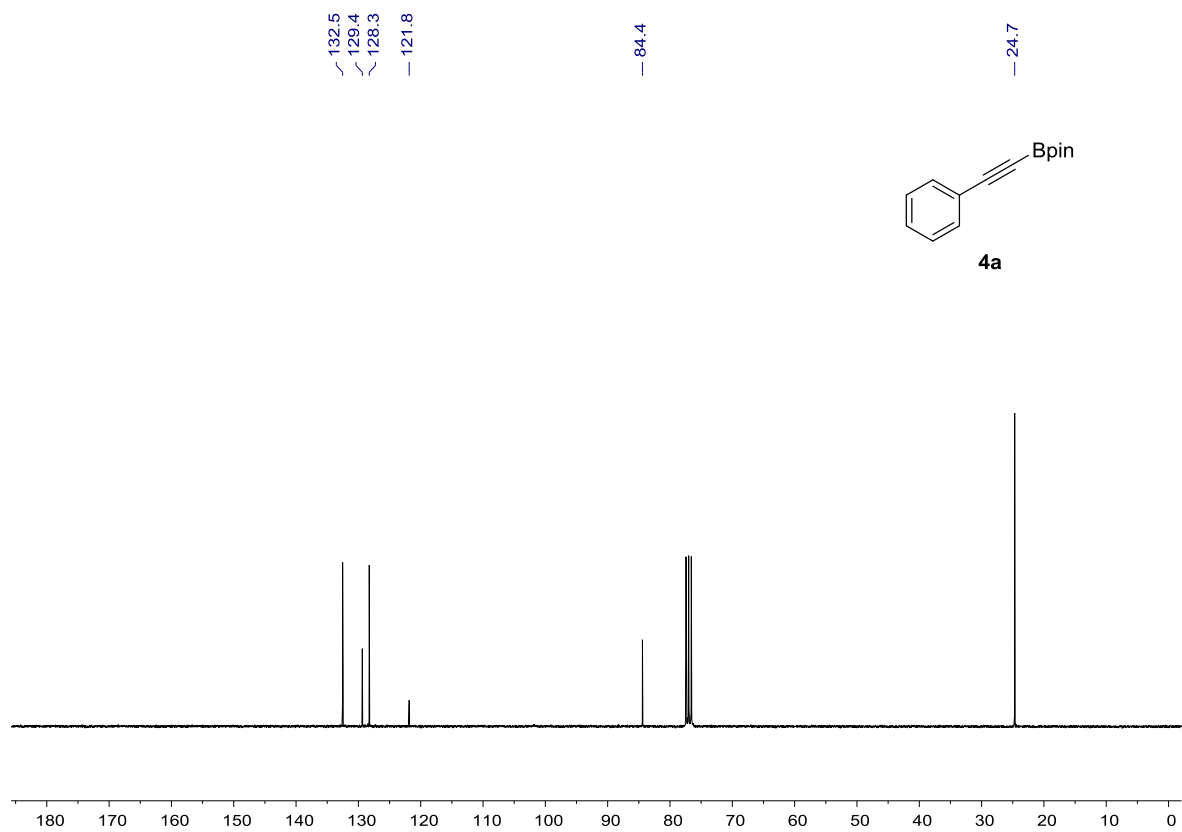

$^{11}\text{B}$  NMR spectrum (96 MHz,  $\text{CDCl}_3$ ) of **4a**

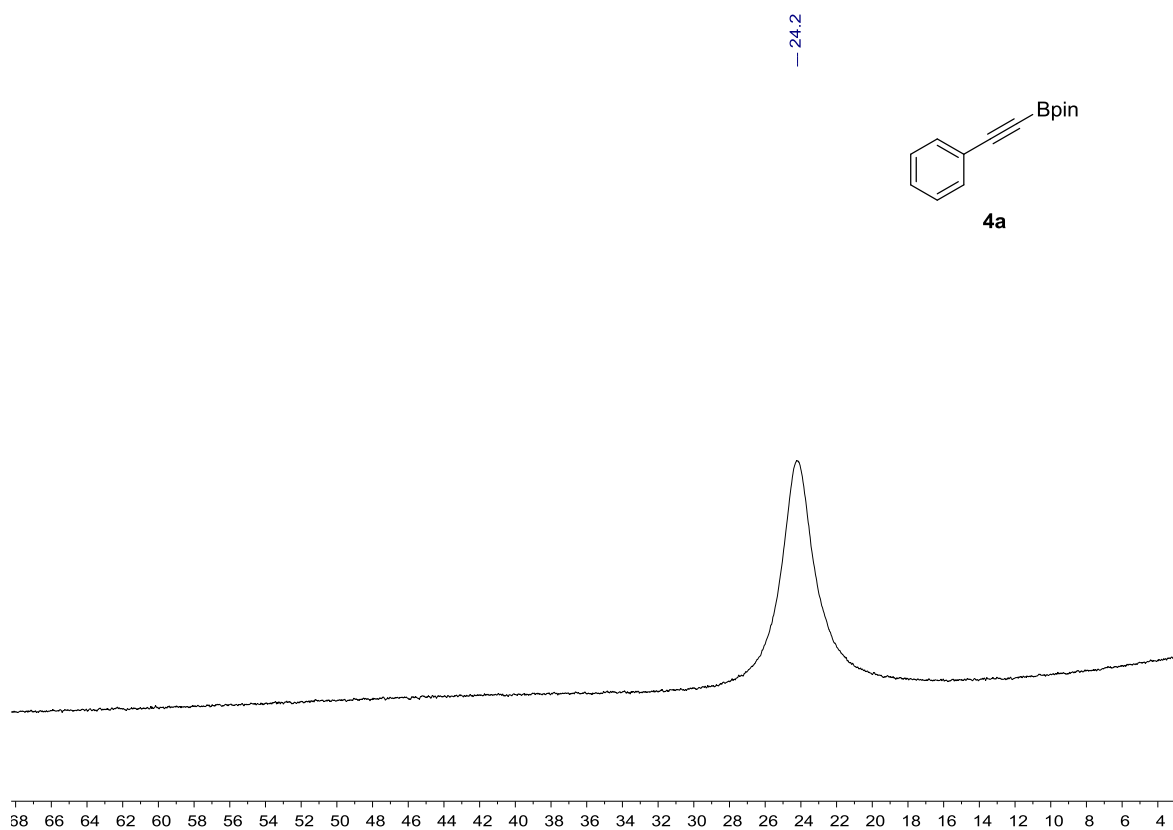

$^1\text{H}$  NMR spectrum (300 MHz,  $\text{CDCl}_3$ ) of **5**

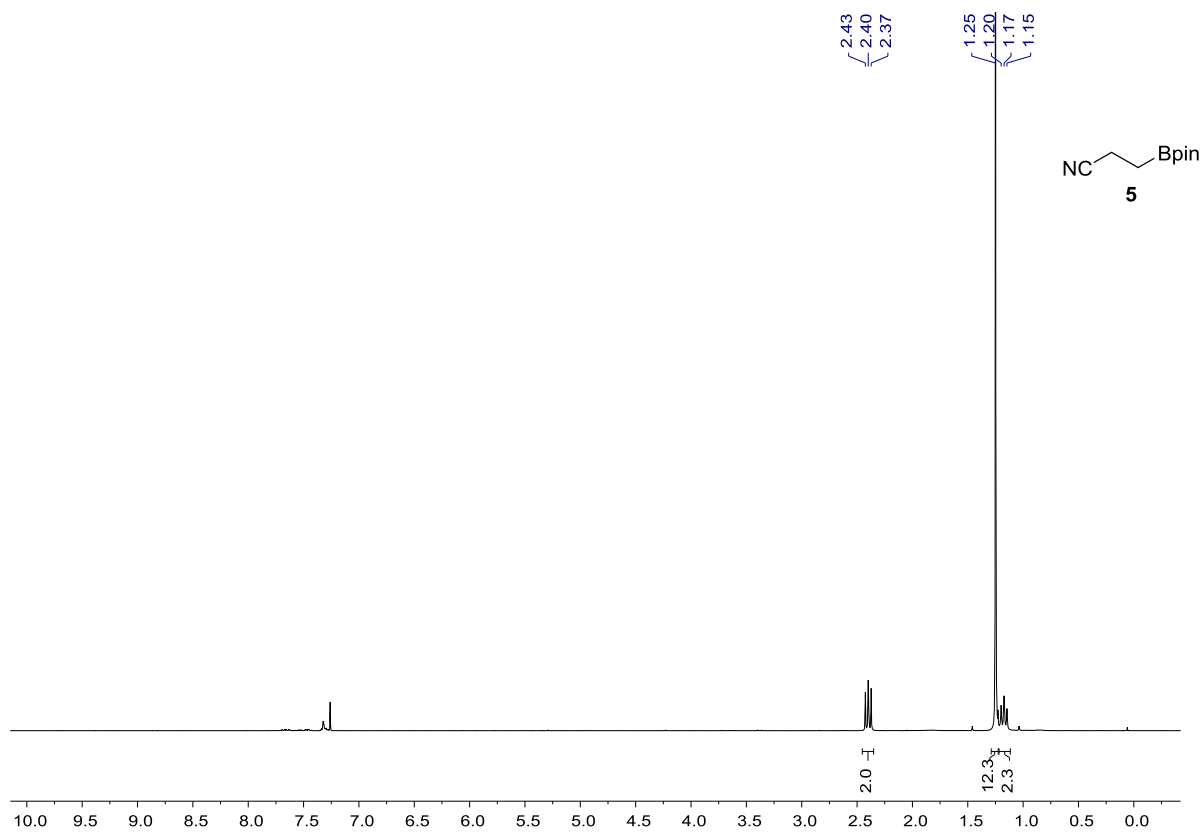

## VII. Single-crystal X-ray Diffraction

**Crystal structure determination** Crystals suitable for single-crystal X-ray diffraction were selected, coated in perfluoropolyether oil, and mounted on MiTeGen sample holders. Diffraction data were collected on Bruker X8 Apex II 4-circle diffractometers with CCD area detectors using Mo-K $\alpha$  radiation monochromated by graphite (**6b**, **10b**) or multi-layer focusing mirrors (**2a**). The crystals were cooled using an Oxford Cryostreams or Bruker Kryoflex II low-temperature device. Data were collected at 100 K. The images were processed and corrected for Lorentz-polarization effects and absorption as implemented in the Bruker software packages. The structures were solved using the intrinsic phasing method (SHELXT)<sup>[4]</sup> and Fourier expansion technique. All non-hydrogen atoms were refined in anisotropic approximation, with hydrogen atoms 'riding' in idealized positions, by full-matrix least squares against  $F^2$  of all data, using SHELXL<sup>[5]</sup> software and the SHELXLE graphical user interface.<sup>[6]</sup> The crystal structure of **2a** was solved in space group  $P2_1$  and transformed to higher symmetry (space group  $P2_1/c$ ) using the PLATON program.<sup>[7]</sup> The PLATON program<sup>[7]</sup> was also used for the determination of the occurrence of twinning. The crystal structure of **2a** was refined as a twin applying the twin matrix  $(-1\ 0\ 0, 0\ -1\ 0, 0\ 0\ 1)$ . The twin component was refined to 47.5%. The crystal structure of **10b** was refined as a twin applying the twin matrix  $(0\ 2\ 0, 0.5\ 0\ 0, 0\ 0\ -1)$ . The twin component was refined to 1.9%. Diamond<sup>[8]</sup> software was used for graphical representation. Crystal data and experimental details are listed in Table **S7**; full structural information has been deposited with Cambridge Crystallographic Data Centre. CCDC-1918365 (**2a**), 1918366 (**6b**), and 1918367 (**10b**).

**Table S7:** Single-crystal X-ray diffraction data and structure refinements of **2a**, **6b**, and **10b**.

| Data                                                         | <b>2a</b>                                                     | <b>6b</b>                                                     | <b>10b</b>                                                      |
|--------------------------------------------------------------|---------------------------------------------------------------|---------------------------------------------------------------|-----------------------------------------------------------------|
| CCDC number                                                  | 1918365                                                       | 1918366                                                       | 1918367                                                         |
| Empirical formula                                            | C <sub>26</sub> H <sub>41</sub> B <sub>3</sub> O <sub>6</sub> | C <sub>27</sub> H <sub>36</sub> B <sub>2</sub> O <sub>5</sub> | C <sub>21</sub> H <sub>31</sub> B <sub>2</sub> BrO <sub>5</sub> |
| Formula weight /<br>g·mol <sup>-1</sup>                      | 482.02                                                        | 462.18                                                        | 464.99                                                          |
| <i>T</i> / K                                                 | 100(2)                                                        | 100(2)                                                        | 100(2)                                                          |
| $\lambda$ / Å, radiation                                     | MoK $\alpha$ 0.71073                                          | MoK $\alpha$ 0.71073                                          | MoK $\alpha$ 0.71073                                            |
| Crystal size / mm <sup>3</sup>                               | 0.15×0.30×0.40                                                | 0.21×0.32×0.70                                                | 0.19×0.30×0.34                                                  |
| Crystal color, habit                                         | colorless block                                               | colorless block                                               | colorless block                                                 |
| $\mu$ / mm <sup>-1</sup>                                     | 0.077                                                         | 0.079                                                         | 1.841                                                           |
| Crystal system                                               | Monoclinic                                                    | Triclinic                                                     | Orthorhombic                                                    |
| Space group                                                  | <i>P</i> 2 <sub>1</sub> / <i>c</i>                            | <i>P</i> $\bar{1}$                                            | <i>P</i> 2 <sub>1</sub> 2 <sub>1</sub> 2 <sub>1</sub>           |
| <i>a</i> / Å                                                 | 13.084(7)                                                     | 9.492(3)                                                      | 18.711(5)                                                       |
| <i>b</i> / Å                                                 | 11.994(5)                                                     | 11.493(7)                                                     | 9.336(2)                                                        |
| <i>c</i> / Å                                                 | 17.812(7)                                                     | 13.055(3)                                                     | 12.982(3)                                                       |
| $\alpha$ / °                                                 | 90                                                            | 72.7910(10)                                                   | 90                                                              |
| $\beta$ / °                                                  | 90.124(12)                                                    | 74.7050(10)                                                   | 90                                                              |
| $\gamma$ / °                                                 | 90                                                            | 74.3700(10)                                                   | 90                                                              |
| Volume / Å <sup>3</sup>                                      | 2795(2)                                                       | 1283.7(9)                                                     | 2267.6(9)                                                       |
| <i>Z</i>                                                     | 4                                                             | 2                                                             | 4                                                               |
| $\rho_{\text{calc}}$ / g·cm <sup>-3</sup>                    | 1.145                                                         | 1.196                                                         | 1.362                                                           |
| <i>F</i> (000)                                               | 1040                                                          | 496                                                           | 968                                                             |
| $\theta$ range / °                                           | 1.556 - 26.053                                                | 1.667 - 26.022                                                | 1.088 - 30.039                                                  |
| Reflections collected                                        | 20326                                                         | 23816                                                         | 76146                                                           |
| Unique reflections                                           | 5512                                                          | 5067                                                          | 6647                                                            |
| Parameters / restraints                                      | 329 / 0                                                       | 393 / 0                                                       | 458 / 625                                                       |
| GooF on <i>F</i> <sup>2</sup>                                | 1.027                                                         | 1.023                                                         | 1.246                                                           |
| <i>R</i> <sub>1</sub> [ <i>I</i> > 2 $\sigma$ ( <i>I</i> )]  | 0.0465                                                        | 0.0387                                                        | 0.0466                                                          |
| <i>wR</i> <sup>2</sup> (all data)                            | 0.1091                                                        | 0.0982                                                        | 0.1049                                                          |
| Max. / min. residual electron<br>density / e·Å <sup>-3</sup> | 0.591 / -0.239                                                | 0.273 / -0.233                                                | 0.543 / -1.387                                                  |



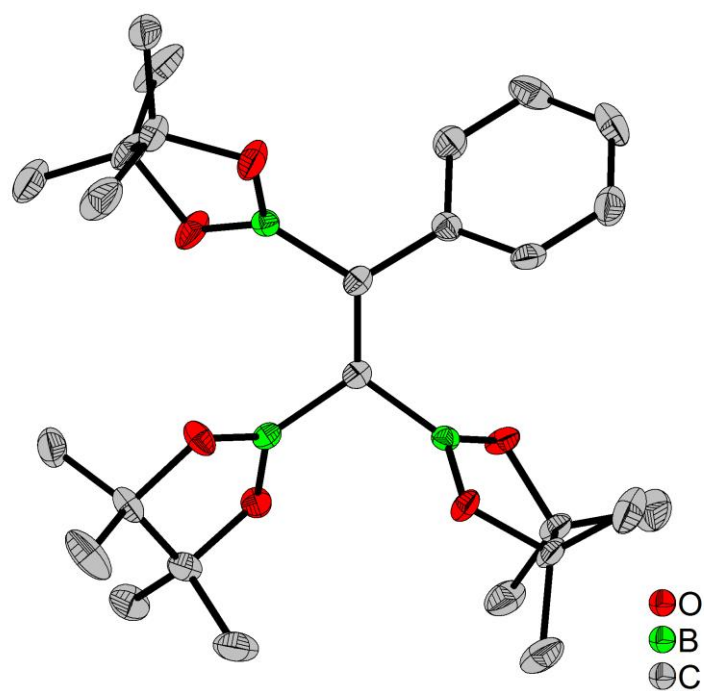

**Figure S5.** Molecular structure of **2a** in the solid state at 100 K. Atomic displacement ellipsoids are drawn at the 50% probability level, and H atoms are omitted for clarity.

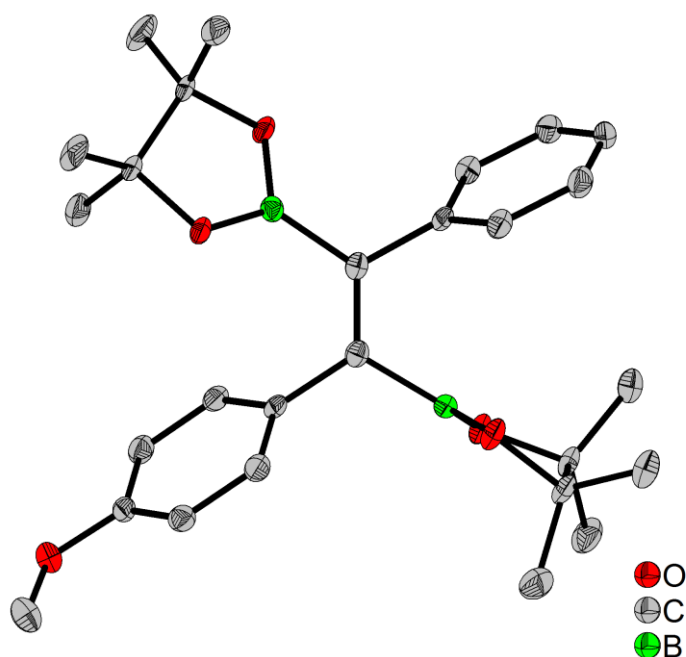

**Figure S6.** Molecular structure of **6b** in the solid state at 100 K. Atomic displacement ellipsoids are drawn at the 50% probability level, and H atoms are omitted for clarity. One of the Bpin moieties is disordered and only the part with 88% occupancy is shown.

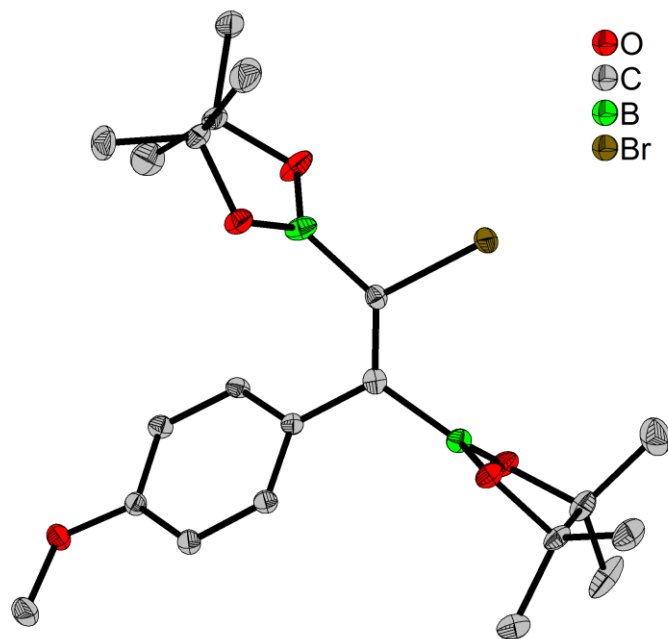

**Figure S7.** Molecular structure of **10b** in the solid state at 100 K. Atomic displacement ellipsoids are drawn at the 50% probability level, and H atoms are omitted for clarity. The molecule is disordered except for one Bpin moiety and only the part with 85.5% occupancy is shown.

## VIII. References

- [1] C. I. Lee, W. C. Shih, J. Zhou, J. H. Reibenspies, O. V. Ozerov, *Angew. Chem. Int. Ed.* **2015**, *54*, 14003-14007; *Angew. Chem.* **2015**, *127*, 14209-14213.
- [2] Y. Nishihara, M. Miyasaka, M. Okamoto, H. Takahashi, E. Inoue, K. Tanemura, K. Takagi, *J. Am. Chem. Soc.* **2007**, *129*, 12634-12635.
- [3] J. J. Eisch, W. Liu, L. Zhu, A. L. Rheingold, *Eur. J. Org. Chem.* **2015**, *2015*, 7384-7394.
- [4] G. Sheldrick, *Acta Crystallogr.* **2015**, *A71*, 3-8.
- [5] G. Sheldrick, *Acta Crystallogr.* **2008**, *A64*, 112-122.
- [6] C. B. Hubschle, G. M. Sheldrick, B. Dittrich, *J. Appl. Crystallogr.* **2011**, *44*, 1281-1284.
- [7] A. Spek, *Acta Crystallogr.* **2009**, *D65*, 148-155.
- [8] Brandenburg, K. Diamond (version 4.4.0), Crystal and Molecular Structure Visualization, Crystal Impact, H. Putz & K. Brandenburg GbR, Bonn (Germany), **2017**
